# Supplementary material for: Carbonyldiimidazole (CDI) promoted direct and instantaneous thio-esterification of a carboxylic acid and thiol at ambient temperature
Source: Royal Society of Chemistry journal article supplement (doi:10.1039/d4ob01376j), 2024-01-01
Supplement: d4ob01376j1.pdf [file d4ob01376j1.pdf]

## Supplementary Information

### **Carbonyldiimidazole (CDI) Promoted Direct and Instantaneous Thio-esterification of Carboxylic Acid and Thiol at Ambient Temperature**

Biman Bera,<sup>a</sup> Upasi Goswami,<sup>a</sup> Sujan Seikh,<sup>b</sup> Mrinal K. Bera\*<sup>a</sup>

<sup>a</sup> Department of Chemistry, Indian Institute of Engineering Science and Technology (IEST), Shibpur, P.O- Botanic Garden, Howrah- 711103 (WB), India.

<sup>b</sup> Department of Chemistry, University of Kalyani, Kalyani- 741235 (WB), India

E-mail: [mrinalkbera26@gmail.com](mailto:mrinalkbera26@gmail.com)

## Table of Content

|                                                                              |         |
|------------------------------------------------------------------------------|---------|
| 1. General methods.....                                                      | S1      |
| 2. General method for synthesizing carboxylic acids 1a-1m, 3a-3i, 9a-9f..... | S2      |
| 3. General procedure for the synthesis of thioester 2a.....                  | S3      |
| 4. Characterization data of thioester 2b-2n, 4a-4h, 6a-6g.....               | S4-S10  |
| 5. General Procedure for the synthesis of thioester 8.....                   | S10     |
| 6. General Procedure for the synthesis of thioester 10a.....                 | S11     |
| 7. Characterization data of thioester 10b-10f.....                           | S11-S12 |
| 8. Copies of $^1\text{H}$ & $^{13}\text{C}$ NMR.....                         | S13-S48 |
| 9. Single crystal XRD study of thioester 2j.....                             | S49     |

## Experimental Section:

### 1. General methods:

All the reactions were performed under nitrogen atmosphere in oven dried flasks. TLC was performed using 100-200 mesh silica gel plates. The column chromatography was performed using silica gel 100-200 mesh. TLC plates were visualized under UV light at 254 nm and molecular iodine vapour.  $^1\text{H}$  NMR spectra were recorded on Bruker 400 MHz spectrometer and  $^{13}\text{C}$  NMR Spectra were recorded on Bruker 100 MHz spectrometer using  $\text{CDCl}_3$  as a solvent with TMS as the internal standard. The chemical shift values at 7.28 and 77 ppm are referenced for  $\text{CDCl}_3$  solvent. The data of HRMS was carried out on a high-resolution mass spectrometer instrument. Melting points were measured with a Lab X India digital melting point apparatus. All the commercial reagents were used from a different commercial source.  $\text{CH}_2\text{Cl}_2$  and  $\text{CH}_3\text{CN}$  were purified by using the traditional drying procedure.

### 2. General method for synthesizing carboxylic acids 1a-1m.

#### a. Typical procedure for the synthesis of carboxylic acid 1a.

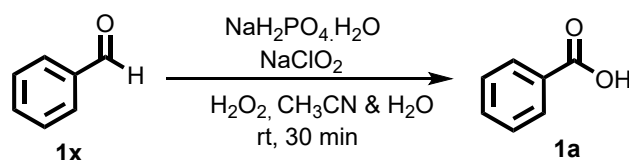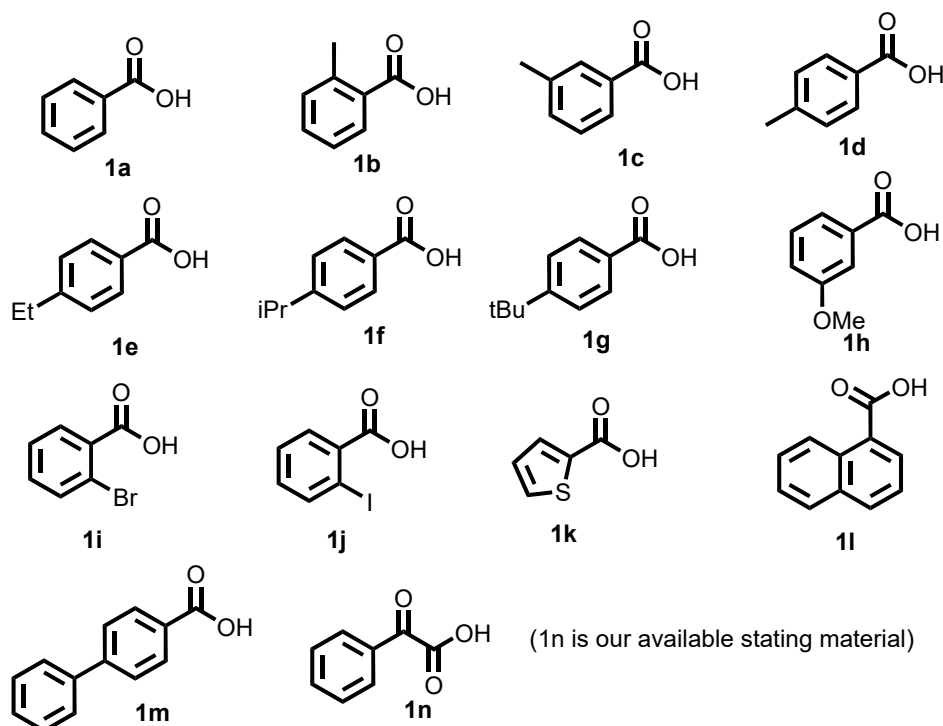

Into a mixture of Benzaldehyde **1x** (150mg, 3.2 mmol),  $\text{NaH}_2\text{PO}_4 \cdot \text{H}_2\text{O}$  (115mg, 1.90 mmol) and  $\text{H}_2\text{O}_2$  (0.12 ml) in  $\text{CH}_3\text{CN}$  (1.5 ml) was added dropwise  $\text{NaClO}_2$  (438 mg, 11 mmol) in  $\text{H}_2\text{O}$  (1.5 ml) at  $25^\circ\text{C}$  for 15 min. After adding  $\text{Na}_2\text{SO}_3$  (28 mg, 0.50 mmol), the mixture was evaporated under reduced pressure. The mixture was acidified by adding 2N HCl and extracted with ethyl acetate. The extract was washed with  $\text{H}_2\text{O}$ , dried with  $\text{Na}_2\text{SO}_4$ . Solvent was removed under reduced pressure to dryness to produce Benzoic Acid **1a** (152 mg, 88%) as white solid.

Carboxylic acids **1b- 1m** were synthesized from their corresponding aryl aldehydes as per the procedure mentioned above. **1n** is our available carboxylic acid.

**b. Typical procedure for the synthesis of aliphatic acids (3a-3i).**

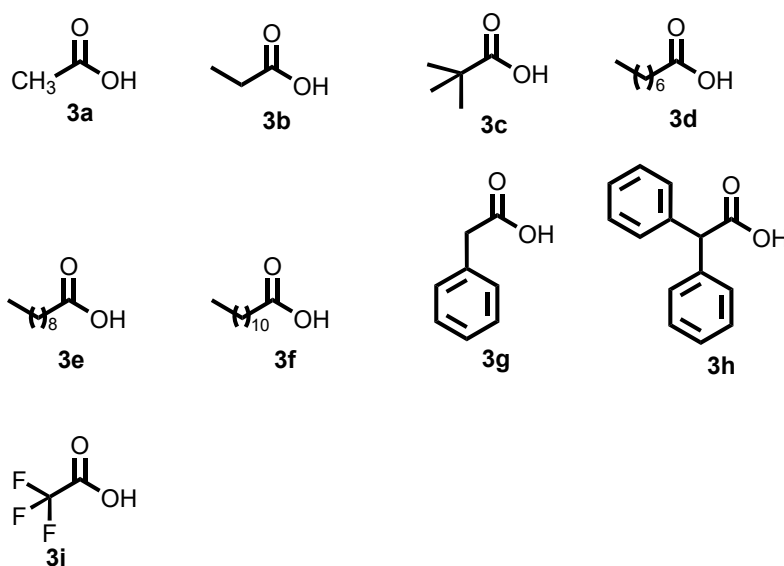

**3a- 3i** are the available aliphatic acids.

**c. Typical procedure for the synthesis of alpha beta unsaturated acids (9a-9f).**

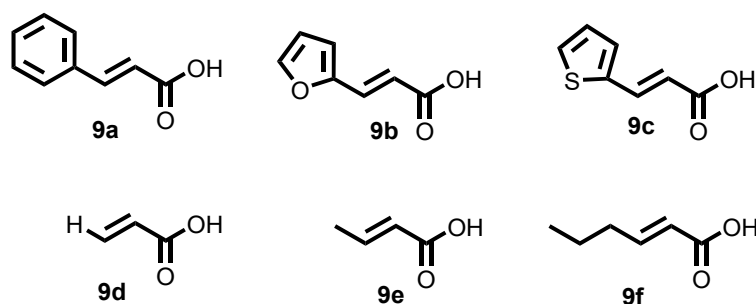

**9a-9f** are the available alpha beta unsaturated acids.

### 3. General procedure for the synthesis of thioester 2a.

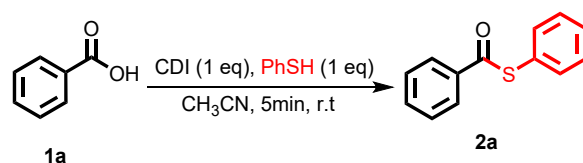

Dry CH<sub>3</sub>CN (3ml) solution of Benzoic acid **1a** (0.8 mmol, 100mg) and CDI (0.8 mmol) was taken in a 50 ml dry round bottom flask fitted with magnetic stir bar under N<sub>2</sub> atmosphere. Then PhSH (0.8 mmol) was added into this mixture. The mixture was stirred at room temperature for 5 min. After the total consumption of the starting material **1a** as shown by TLC, the mixture was evaporated under reduced pressure & then the reaction mixture was quenched by ethyl acetate followed by water. The combined organic layer was separated, washed with brine solution (twice) and collected over anhydrous sodium sulphate.

The concentrated organic solution was then loaded on a 100-200 mesh column of silica gel & eluted with hexane: ethyl acetate (98:2) to get purified thioester **2a** (163 mg, 95%) as yellowish solid.

#### S-phenyl benzothioate(**2a**)

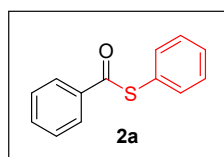

**mp**- 99°C; **<sup>1</sup>H NMR** (400 MHz, CDCl<sub>3</sub>) δ= 8.14-8.09 (m, 2H), 7.68-7.63 (m, 1H), 7.60 (dd, *J*= 6.6, 3.1Hz, 2H), 7.56-7.49 (m, 5H); **<sup>13</sup>C NMR** (100MHz, CDCl<sub>3</sub>) δ= 190.2, 136.7, 135.2, 133.8, 129.6, 129.3, 128.9, 127.6, 127.4; **IR** (neat, cm<sup>-1</sup>) = 1664; **HRMS** (ESI) *m/z* (M+Na)<sup>+</sup> calculated for C<sub>13</sub>H<sub>10</sub>NaOS: 237.0350; found 237.0353.

### 4. Characterization data of thioester 2b-2n, 4a-4h, 6a-6g

#### S-phenyl 2-methylbenzothioate(**2b**)

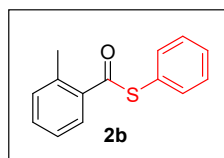

According to the above-mentioned procedure, carboxylic acid **1b** (0.7 mmol, 100 mg) upon reaction with CDI (0.7 mmol) & PhSH (0.7 mmol) to afford thioester **2b** (144 mg, 90%) as orange solid. **mp**-123°C; **<sup>1</sup>H NMR** (400 MHz, CDCl<sub>3</sub>) δ = 8.00 (dd, *J* = 7.7, 1.4 Hz, 1H), 7.59-7.57 (m, 2H), 7.53-7.45 (m, 4H), 7.35-7.30 (m, 2H), 2.55 (s, 3H); **<sup>13</sup>C NMR** (100MHz, CDCl<sub>3</sub>) δ = 192.2, 137.5, 136.7, 134.9, 132.1, 131.8, 129.5, 129.3, 128.7, 128.2, 125.9, 20.8; **IR** (neat, cm<sup>-1</sup>) = 1674; **HRMS** (ESI) *m/z* (M+Na)<sup>+</sup> calculated for C<sub>14</sub>H<sub>12</sub>NaOS: 251.0507; found 251.0509.

#### S-phenyl 3-methylbenzothioate(**2c**)

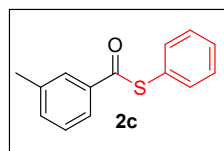

According to the above-mentioned procedure, carboxylic acid **1c** (0.7 mmol, 100 mg) upon reaction with CDI (0.7 mmol) & PhSH (0.7 mmol) to afford thioester **2c** (142 mg, 89%) as white solid. **mp**-122°C; **<sup>1</sup>H NMR** (400 MHz, CDCl<sub>3</sub>) δ= 7.91-7.88 (m, 2H), 7.58 (dt, *J*= 5.7, 1.7 Hz, 2H), 7.51 (dd, *J*= 5.0, 1.9 Hz, 3H), 7.47-7.39 (m, 2H), 2.4 (s, 3H); **<sup>13</sup>C NMR** (100MHz, CDCl<sub>3</sub>) δ = 190.3, 136.7, 135.1, 134.5, 129.5, 129.3, 128.6, 127.9, 127.5, 124.7, 21.4; **IR** (neat, cm<sup>-1</sup>) = 1673; **HRMS** (ESI) *m/z* (M+Na)<sup>+</sup> calculated for C<sub>14</sub>H<sub>12</sub>NaOS: 251.0507; found 251.0510.

### S-phenyl 4-methylbenzothioate(2d)

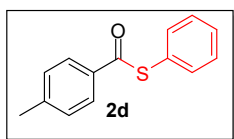

According to the above-mentioned procedure, carboxylic acid **1d** (0.7 mmol, 100 mg) upon reaction with CDI (0.7 mmol) & PhSH (0.7mmol) to afford thioester **2d** (146 mg, 91%) as yellow solid. **mp**-121°C; **<sup>1</sup>H NMR** (400 MHz, CDCl<sub>3</sub>) δ= 7.99 (d, *J*= 8.3 Hz, 2H), 7.57 (dd, *J*=4.7,1.6 Hz, 2H), 7.50 (dt, *J*= 4.6, 2.9 Hz, 3H), 7.32 (d, *J*=8.0 Hz, 2H), 2.47(s, 3H); **<sup>13</sup>C NMR** (100MHz,CDCl<sub>3</sub>) δ= 189.7, 144.6, 135.2, 134.1, 130.7, 129.5, 129.2, 127.6, 21.8; **IR** (neat, cm<sup>-1</sup>) = 1675; **HRMS** (ESI) *m/z* (M+Na)<sup>+</sup> calculated for C<sub>14</sub>H<sub>12</sub>NaOS: 251.0507; found 251.0512.

### S-phenyl 4-ethylbenzothioate(2e)

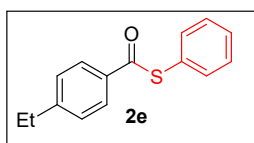

According to the above-mentioned procedure, carboxylic acid **1e** (0.6 mmol, 100 mg) upon reaction with CDI (0.6 mmol) & PhSH (0.6 mmol) to afford thioester **2e** (132 mg, 91%) as white solid **mp**-135°C; **<sup>1</sup>H NMR** (400 MHz, CDCl<sub>3</sub>) δ= 7.99-7.97 (m, 2H), 7.54-7.53 (m, 2H), 7.47 (d, *J*=2.6 Hz, 3H), 7.34 (d, *J*= 8.3 Hz, 2H), 2.75 (q, *J*=7.6 Hz, 2H), 1.30 (t, *J*= 7.6Hz, 2H); **<sup>13</sup>C NMR** (100MHz,CDCl<sub>3</sub>) δ= 189.8, 150.8, 135.2, 134.3, 129.5, 129.2, 128.3, 127.7, 127.5, 29.0, 15.2; **IR** (neat, cm<sup>-1</sup>) = 1678; **HRMS** (ESI) *m/z* (M+Na)<sup>+</sup> calculated for C<sub>15</sub>H<sub>14</sub>NaOS: 265.0663; found 265.0667.

### S-phenyl 4-isopropylbenzothioate(2f)

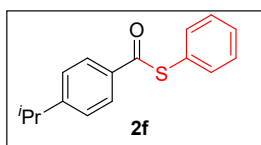

According to the above-mentioned procedure, carboxylic acid **1f** (0.6 mmol, 100 mg) upon reaction with CDI (0.6 mmol) & PhSH (0.6 mmol) to afford thioester **2f** (141 mg, 92%) as orange solid. **mp**-131°C; **<sup>1</sup>H NMR** (400 MHz, CDCl<sub>3</sub>) δ= 8.04 (d, *J*= 8.2 Hz, 2H), 7.58 (dd, *J*= 6.6, 3.2Hz, 2H), 7.50 (dd, *J*=5.1, 2.0 Hz, 3H), 7.41-7.37 (m, 2H), 3.03 (hept, *J*= 6.9 Hz, 1H), 1.34 (d, *J*= 6.9 Hz, 6H); **<sup>13</sup>C NMR**(100MHz,CDCl<sub>3</sub>) δ= 189.7, 135.2, 134.5, 129.5, 129.3, 127.8, 127.5, 126.9, 34.4, 23.7; **IR** (neat, cm<sup>-1</sup>) = 1677; **HRMS** (ESI) *m/z* (M+Na)<sup>+</sup> calculated for C<sub>16</sub>H<sub>16</sub>NaOS: 279.0820; found 279.0824.

### S-phenyl 4-(tert-butyl)benzothioate(2g)

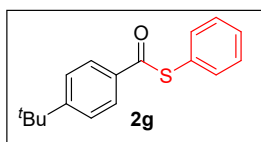

According to the above-mentioned procedure, carboxylic acid **1g** (0.5 mmol, 100 mg) upon reaction with CDI (0.5 mmol) & PhSH (0.5 mmol) to afford thioester **2g** (126 mg, 93%) as yellowish liquid. **<sup>1</sup>H NMR** (400 MHz, CDCl<sub>3</sub>) δ= 8.04-8.01 (m, 2H), 7.57-7.53 (m, 4H), 7.50 (dd, *J*= 5.1, 1.9 Hz, 3H), 1.40 (s, 9H); **<sup>13</sup>C NMR** (100MHz, CDCl<sub>3</sub>) δ= 189.6, 157.6, 135.2, 134.1, 129.5, 129.3,127.5, 127.5, 125.8, 35.3, 31.1; **IR** (neat, cm<sup>-1</sup>) = 1675; **HRMS** (ESI) *m/z* (M+Na)<sup>+</sup> calculated for C<sub>17</sub>H<sub>18</sub>NaOS: 293.0976; found 293.0979.

### S-phenyl 3-methoxybenzothioate(2h)

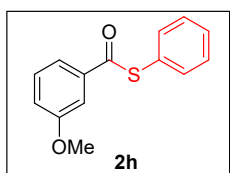

According to the above-mentioned procedure, carboxylic acid **1h** (0.6 mmol, 100 mg) upon reaction with CDI (0.6 mmol) & PhSH (0.6 mmol) to afford thioester **2h** (144 mg, 98%) as yellowish liquid. **<sup>1</sup>H NMR** (400 MHz, CDCl<sub>3</sub>)  $\delta$ = 7.74-7.67 (m, 1H), 7.57 (dt,  $J$ = 4.0, 3.0 Hz, 3H), 7.50 (dd,  $J$ = 5.0, 1.9 Hz, 3H), 7.43 (t,  $J$ = 8.0 Hz, 1H), 7.19 (ddd,  $J$ = 8.4, 2.7, 1.0 Hz, 1H), 3.88 (s, 3H); **<sup>13</sup>C NMR** (100 MHz, CDCl<sub>3</sub>)  $\delta$ = 190.1, 159.9, 137.9, 135.1, 129.7, 129.5, 129.2, 127.3, 120.1, 111.7, 55.5; **IR** (neat, cm<sup>-1</sup>) = 1679; **HRMS** (ESI)  $m/z$  (M+Na)<sup>+</sup> calculated for C<sub>14</sub>H<sub>12</sub>NaO<sub>2</sub>S: 267.0456; found 267.0459.

### S-phenyl 2-bromobenzothioate(2i)

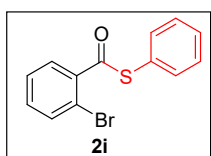

According to the above-mentioned procedure, carboxylic acid **1i** (0.4 mmol, 100 mg) upon reaction with CDI (0.4 mmol) & PhSH (0.4 mmol) to afford thioester **2i** (116 mg, 80%) as white solid. **mp**-172°C; **<sup>1</sup>H NMR** (400 MHz, CDCl<sub>3</sub>)  $\delta$ = 7.75 (dd,  $J$ = 7.6, 1.8 Hz, 1H), 7.69 (dd,  $J$ = 7.9, 1.3 Hz, 1H), 7.59-7.54 (m, 2H), 7.49 (dd,  $J$ = 5.0, 2.0 Hz, 3H), 7.41 (dd,  $J$ = 24.0, 1.6 Hz, 2H); **<sup>13</sup>C NMR** (100 MHz, CDCl<sub>3</sub>)  $\delta$ = 191.2, 139.2, 135.2, 134.5, 134.1, 132.3, 129.8, 129.4, 129.1, 127.2, 119.1; **IR** (neat, cm<sup>-1</sup>) = 1670; **HRMS** (ESI)  $m/z$  (M+Na)<sup>+</sup> calculated for C<sub>13</sub>H<sub>9</sub>BrNaOS: 314.9455; found 314.9458.

### S-phenyl 2-iodobenzothioate(2j)

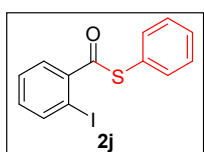

According to the above-mentioned procedure, carboxylic acid **1j** (0.4 mmol, 100 mg) upon reaction with CDI (0.4 mmol) & PhSH (0.4 mmol) to afford thioester **2j** (116 mg, 85%) as white solid. **mp**-170°C; **<sup>1</sup>H NMR** (400 MHz, CDCl<sub>3</sub>)  $\delta$ = 7.99 (dd,  $J$ = 7.9, 1.1 Hz, 1H), 7.74 (dd,  $J$ = 7.7, 1.6 Hz, 1H), 7.62-7.56 (m, 2H), 7.53-7.43 (m, 4H), 7.21 (td,  $J$ = 7.7, 1.6 Hz, 1H); **<sup>13</sup>C NMR** (100 MHz, CDCl<sub>3</sub>)  $\delta$ = 192.4, 142.4, 140.7, 134.5, 132.5, 129.8, 129.4, 128.5, 128.1, 127.5, 91.5; **IR** (neat, cm<sup>-1</sup>) = 1671; **HRMS** (ESI)  $m/z$  (M+Na)<sup>+</sup> calculated for C<sub>13</sub>H<sub>9</sub>INaOS: 362.9317; found 362.9320.

### S-phenyl thiophene-2-carbothioate(2k)

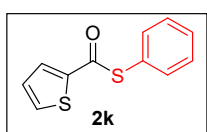

According to the above-mentioned procedure, carboxylic acid **1k** (0.7 mmol, 100 mg) upon reaction with CDI (0.7 mmol) & PhSH (0.7 mmol) to afford thioester **2k** (140 mg, 82%) as orange solid. **mp**-163°C; **<sup>1</sup>H NMR** (400 MHz, CDCl<sub>3</sub>)  $\delta$ = 7.94 (dd,  $J$ = 3.9, 1.2 Hz, 1H), 7.69 (dd,  $J$ = 5.0, 1.2 Hz, 1H), 7.59-7.54 (m, 2H), 7.48 (dt,  $J$ = 4.9, 1.8 Hz, 3H), 7.19 (dd,  $J$ = 5.0, 3.8 Hz, 1H); **<sup>13</sup>C NMR** (100 MHz, CDCl<sub>3</sub>)  $\delta$ = 182.1, 141.4, 135.1, 133.3, 131.6, 129.7, 129.3, 128.1, 126.9; **IR** (neat, cm<sup>-1</sup>) = 1640; **HRMS** (ESI)  $m/z$  (M+Na)<sup>+</sup> calculated for C<sub>11</sub>H<sub>8</sub>NaOS<sub>2</sub>: 242.9914; found 242.9918.

### S-phenyl naphthalene-1-carbothioate(2l)

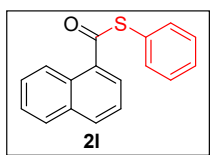

According to the above-mentioned procedure, carboxylic acid **1l** (0.5 mmol, 100 mg) upon reaction with CDI (0.5 mmol) & PhSH (0.5 mmol) to afford thioester **2l** (138 mg, 90%) as brownish solid. **mp**-190°C; **<sup>1</sup>H NMR** (400 MHz, CDCl<sub>3</sub>) δ= 8.61-8.59 (m, 1H), 8.27 (dd, *J*= 7.3, 1.2 Hz, 1H), 8.08 (dt, *J*= 8.3, 1.1 Hz, 1H), 7.93 (dd, *J*= 7.8, 1.7 Hz, 1H), 7.66-7.53 (m, 8H); **<sup>13</sup>C NMR** (100MHz, CDCl<sub>3</sub>) δ= 192.3, 135.2, 134.9, 134.7, 133.8, 133.4, 129.6, 129.4, 128.4, 128.2, 128.1, 126.8, 125.3, 124.5; **IR** (neat, cm<sup>-1</sup>) = 1672; **HRMS** (ESI) *m/z* (M+Na)<sup>+</sup> calculated for C<sub>17</sub>H<sub>12</sub>NaOS: 287.0507; found 287.0510.

### S-phenyl [1,1'-biphenyl]-4-carbothioate(2m)

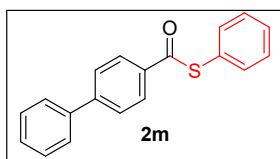

According to the above-mentioned procedure, carboxylic acid **1m** (0.5mmol, 100 mg) upon reaction with CDI (0.5 mmol) & PhSH (0.5 mmol) to afford thioester **2m** (133 mg, 91%) as white solid. **mp**-206°C; **<sup>1</sup>H NMR** (400 MHz, CDCl<sub>3</sub>) δ= 8.16-8.13 (m, 2H), 7.76-7.74 (m, 2H), 7.69-7.67 (m, 2H), 7.60-7.58 (m, 2H), 7.54-7.50 (m, 5H), 7.47 (d, *J*= 7.3 Hz, 1H); **<sup>13</sup>C NMR** (100MHz, CDCl<sub>3</sub>) δ= 189.7, 140.4, 139.7, 135.3, 135.2, 129.5, 129.3, 129.1, 128.4, 128.1, 127.4, 127.3; **IR** (neat, cm<sup>-1</sup>) = 1673; **HRMS** (ESI) *m/z* (M+Na)<sup>+</sup> calculated for C<sub>19</sub>H<sub>14</sub>NaOS: 313.0663; found 313.0667.

### S-phenyl 2-oxo-2-phenylethanethioate(2n)

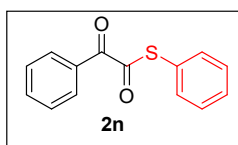

According to the above-mentioned procedure, carboxylic acid **1n** (0.6mmol, 100 mg) upon reaction with CDI (0.6 mmol) & PhSH (0.6 mmol) to afford thioester **2n** (148 mg, 92%) as yellowish liquid. **<sup>1</sup>H NMR** (400 MHz, CDCl<sub>3</sub>) δ= 7.59-7.53 (m, 4H), 7.45 (dddd, *J*= 7.1, 6.1, 4.9, 1.7 Hz, 6H); **<sup>13</sup>C NMR** (100MHz, CDCl<sub>3</sub>) δ= 188.4, 135.2, 130.1, 129.4, 127.1; **IR** (neat, cm<sup>-1</sup>) = 1709, 1650; **HRMS** (ESI) *m/z* (M+Na)<sup>+</sup> calculated for C<sub>14</sub>H<sub>10</sub>NaO<sub>2</sub>S: 265.0299; found 265.0303.

### S-phenyl ethanethioate(4a)

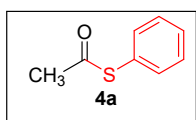

According to the above-mentioned procedure, carboxylic acid **3a** (1.66 mmol, 100 mg) upon reaction with CDI (1.66 mmol) & PhSH (1.66 mmol) to afford thioester **4a** (192 mg, 76%) as white liquid. **<sup>1</sup>H NMR** (400 MHz, CDCl<sub>3</sub>) δ= 7.48-7.41 (m, 5H), 2.45 (s, 1H); **<sup>13</sup>C NMR** (100MHz, CDCl<sub>3</sub>) δ= 194.2, 134.5, 129.5, 129.2, 127.9, 30.2; **IR** (neat, cm<sup>-1</sup>) = 1703; **HRMS** (ESI) *m/z* (M+H)<sup>+</sup> calculated for C<sub>8</sub>H<sub>9</sub>OS: 153.0374; found 153.0377.



### S-phenyl propanethioate(4b)

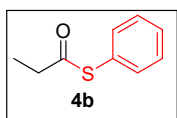

According to the above-mentioned procedure, carboxylic acid **3b** (1.34 mmol, 100 mg) upon reaction with CDI (1.34 mmol) & PhSH (1.34 mmol) to afford thioester **4b** (175mg, 78%) as white liquid. <sup>1</sup>H NMR (400 MHz, CDCl<sub>3</sub>) δ= 7.47-7.42 (m, 5H), 2.72 (q, *J*= 7.5 Hz, 2H), 1.26 (t, *J*= 7.5 Hz, 3H); <sup>13</sup>C NMR (100MHz, CDCl<sub>3</sub>) δ= 198.3, 134.6, 129.3, 129.2, 127.8, 37.1, 9.6; IR (neat, cm<sup>-1</sup>) = 1704; HRMS (ESI) m/z (M+H)<sup>+</sup> calculated for C<sub>9</sub>H<sub>11</sub>OS: 167.0531; found 167.0534.

### S-phenyl 2,2-dimethylpropanethioate(4c)

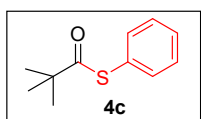

According to the above-mentioned procedure, carboxylic acid **3c** (0.9 mmol, 100 mg) upon reaction with CDI (0.9 mmol) & PhSH (0.9 mmol) to afford thioester **4c** (161mg, 85%) as yellowish liquid. <sup>1</sup>H NMR (400 MHz, CDCl<sub>3</sub>) δ= 7.46-7.38 (m, 5H), 1.35 (s, 9H); <sup>13</sup>C NMR (100MHz, CDCl<sub>3</sub>) δ= 204.7, 135.0, 129.1, 129.1, 128.1, 46.9, 27.4; IR (neat, cm<sup>-1</sup>) = 1706; HRMS (ESI) m/z (M+H)<sup>+</sup> calculated for C<sub>11</sub>H<sub>15</sub>OS: 195.0844; found 195.0848.

### S-phenyl octanethioate(4d)

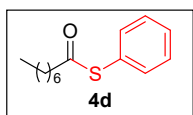

According to the above-mentioned procedure, carboxylic acid **3d** (0.6 mmol, 100 mg) upon reaction with CDI (0.6 mmol) & PhSH (0.6 mmol) to afford thioester **4d** (127mg, 78%) as white liquid. <sup>1</sup>H NMR (400 MHz, CDCl<sub>3</sub>) δ= 7.46-7.42 (m, 5H), 2.69 (t, *J*= 7.5 Hz, 2H), 1.75 (p, *J*= 7.4 Hz, 2H), 1.47-1.27 (m, 8H), .94-.91 (m, 3H); <sup>13</sup>C NMR (100MHz, CDCl<sub>3</sub>) δ= 197.5, 134.5, 129.3, 129.2, 128.0, 43.7, 31.6, 28.9, 25.6, 22.6, 14.1; IR (neat, cm<sup>-1</sup>) = 1709; HRMS (ESI) m/z (M+H)<sup>+</sup> calculated for C<sub>14</sub>H<sub>21</sub>OS: 237.1313; found 237.1317.

### S-phenyl decanethioate(4e)

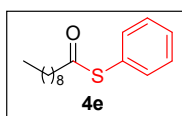

According to the above-mentioned procedure, carboxylic acid **3e** (0.5 mmol, 100 mg) upon reaction with CDI (0.5 mmol) & PhSH (0.5 mmol) to afford thioester **4e** (123mg, 80%) as yellowish liquid. <sup>1</sup>H NMR (400 MHz, CDCl<sub>3</sub>) δ= 7.46-.7.41 (m, 5H), 2.68 (t, *J*= 7.5 Hz, 2H), 1.74 (p, *J*= 7.4 Hz, 2H), 1.44-1.26 (m, 12H), .92 (t, *J*= 6.7 Hz, 3H); <sup>13</sup>C NMR (100MHz, CDCl<sub>3</sub>) δ= 197.6, 134.5, 129.3, 129.2, 127.9, 43.7, 31.8, 29.4, 29.3, 28.9, 25.6, 22.7, 14.2; IR (neat, cm<sup>-1</sup>) = 1707; HRMS (ESI) m/z (M+H)<sup>+</sup> calculated for C<sub>16</sub>H<sub>25</sub>OS: 265.1626; found 265.1630.

### S-phenyl dodecanethioate(4f)

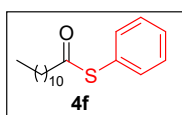

According to the above-mentioned procedure, carboxylic acid **3f** (0.4 mmol, 100 mg) upon reaction with CDI (0.4 mmol) & PhSH (0.4 mmol) to afford thioester **4f** (119mg, 81%) as white liquid. <sup>1</sup>H NMR (400 MHz, CDCl<sub>3</sub>) δ= 7.47-7.39 (m, 5H), 2.68 (t, *J*= 7.5 Hz, 2H), 1.74 (p, *J*= 7.4 Hz, 2H), 1.41-1.29 (m, 16H), .92 (t, *J*= 6.8 Hz, 3H); <sup>13</sup>C NMR (100MHz, CDCl<sub>3</sub>) δ= 197.6, 134.5, 129.3, 129.2, 128.0, 43.7, 31.9, 29.6, 29.5, 29.4, 29.3, 29.0, 25.6, 22.7, 14.2; IR (neat, cm<sup>-1</sup>) = 1705; HRMS (ESI) m/z (M+H)<sup>+</sup> calculated for C<sub>18</sub>H<sub>29</sub>OS: 293.1939; found 293.1942.

### S-phenyl 2-phenylethanethioate(4g)

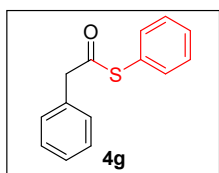

According to the above-mentioned procedure, carboxylic acid **3g** (0.7 mmol, 100 mg) upon reaction with CDI (0.7 mmol) & PhSH (0.7 mmol) to afford thioester **4g** (132 mg, 79%) as white liquid.  $^1\text{H NMR}$  (400 MHz,  $\text{CDCl}_3$ )  $\delta$ = 7.42-7.32 (m, 10H), 3.96 (s, 2H);  $^{13}\text{C NMR}$  (100MHz,  $\text{CDCl}_3$ )  $\delta$ = 195.4, 134.5, 133.3, 129.7, 129.5, 129.21, 128.7, 127.7, 127.6, 50.2; **IR** (neat,  $\text{cm}^{-1}$ ) = 1710; **HRMS** (ESI)  $m/z$  ( $\text{M}+\text{Na}$ ) $^+$  calculated for  $\text{C}_{14}\text{H}_{12}\text{NaOS}$ : 251.0507; found 251.0510.

### S-phenyl 2,2-diphenylethanethioate(4h)

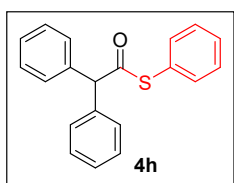

According to the above-mentioned procedure, carboxylic acid **3h** (0.4 mmol, 100 mg) upon reaction with CDI (0.4 mmol) & PhSH (0.4 mmol) to afford thioester **4h** (115mg, 80%) as white solid. **mp**-190°C;  $^1\text{H NMR}$  (400 MHz,  $\text{CDCl}_3$ )  $\delta$ = 7.51-7.35 (m, 15H), 5.41 (s, 1H);  $^{13}\text{C NMR}$  (100MHz,  $\text{CDCl}_3$ )  $\delta$ = 196.7, 138.1, 134.5, 129.6, 129.3, 128.9, 128.8, 127.9, 127.7, 64.9; **IR** (neat,  $\text{cm}^{-1}$ ) = 1712; **HRMS** (ESI)  $m/z$  ( $\text{M}+\text{Na}$ ) $^+$  calculated for  $\text{C}_{20}\text{H}_{16}\text{NaOS}$ : 327.0820; found 327.0824.

### S-butyl benzothioate(6a)

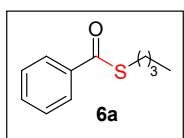

According to the above-mentioned procedure, benzoic acid **1a** (1 equiv, 100 mg) upon reaction with CDI & 1 butane thiol to afford thioester **6a** (138mg, 87%) as white liquid.  $^1\text{H NMR}$  (400 MHz,  $\text{CDCl}_3$ )  $\delta$ = 7.88-7.85(m,2H), 7.46-7.41(m,1H), 7.33(dd,  $J$ = 8.5, 7.1Hz, 2H), 2.97(t,  $J$ = 7.3Hz, 2H). 1.57-1.51(m, 2H), 1.35(h,  $J$ = 7.3Hz,2H), .85(t,  $J$ = 7.4Hz, 3H);  $^{13}\text{C NMR}$  (100MHz,  $\text{CDCl}_3$ )  $\delta$ = 192.1, 137.2, 133.2, 128.6, 127.2, 31.6, 28.7, 22.1, 13.7; **IR** (neat,  $\text{cm}^{-1}$ ) = 1656; **HRMS** (ESI)  $m/z$  ( $\text{M}+\text{H}$ ) $^+$  calculated for  $\text{C}_{11}\text{H}_{15}\text{OS}$ : 195.0844; found 195.0847.

### S-decyl benzothioate(6b)

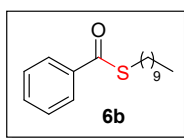

According to the above-mentioned procedure, benzoic acid **1a** (0.8 mmol, 100 mg) upon reaction with CDI (0.8 mmol) & 1 decane thiol (0.8 mmol) to afford thioester **6b** (202mg, 89%) as white liquid.  $^1\text{H NMR}$  (400 MHz,  $\text{CDCl}_3$ )  $\delta$ = 8.00-7.98 (m, 2H), 7.59-7.54 (m, 1H), 7.45 (dd,  $J$ = 8.4, 7.1 Hz, 1H), 3.09 (t,  $J$ = 7.4 Hz, 2H), 1.68 (q,  $J$ = 7.5 Hz, 2H), 1.34-1.28 (m, 14H), .90 (t,  $J$ = 6.8 Hz, 3H);  $^{13}\text{C NMR}$  (100MHz,  $\text{CDCl}_3$ )  $\delta$ = 192.1, 137.3, 133.2, 128.5, 127.2, 31.9, 29.7, 29.7, 29.6, 29.5, 29.5, 29.3, 29.2, 29.1, 29.0, 22.7, 14.2; **IR** (neat,  $\text{cm}^{-1}$ ) = 1658; **HRMS** (ESI)  $m/z$  ( $\text{M}+\text{H}$ ) $^+$  calculated for  $\text{C}_{17}\text{H}_{27}\text{OS}$ : 279.1783; found 279.1787.

### S-cyclohexyl benzothioate(6c)

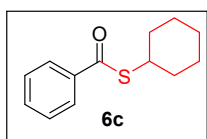

According to the above-mentioned procedure, benzoic acid **1a** (0.8 mmol, 100 mg) upon reaction with CDI (0.8 mmol) & cyclohexane thiol (0.8 mmol) to afford thioester **6c** (154mg, 86%) as white liquid.  $^1\text{H NMR}$  (400 MHz,  $\text{CDCl}_3$ )  $\delta$ = 7.98-7.96 (m, 2H), 7.57-7.53 (m, 1H), 7.44 (dd,  $J$ = 8.4, 7.0 Hz, 2H), 3.75 (tt,  $J$ = 10.1, 3.9 Hz, 1H), 2.06-2.02 (m, 2H), 1.79-1.74 (m, 2H), 1.65-1.62 (m, 1H), 1.55-1.45 (m, 4H), 1.38-1.28 (m, 1H);  $^{13}\text{C NMR}$  (100MHz,  $\text{CDCl}_3$ )  $\delta$ = 191.8, 137.4, 133.2, 128.5, 127.2, 42.5, 33.2, 26.1, 25.6; **IR** (neat,  $\text{cm}^{-1}$ ) = 1660; **HRMS** (ESI)  $m/z$  ( $\text{M}+\text{H}$ )<sup>+</sup> calculated for  $\text{C}_{13}\text{H}_{17}\text{OS}$ : 221.1000; found 221.1004.

### S-(o-tolyl) benzothioate(6d)

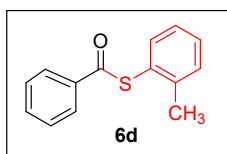

According to the above-mentioned procedure, benzoic acid **1a** (0.8 mmol, 100 mg) upon reaction with CDI (0.8 mmol) & 2-methyl thiol (0.8 mmol) to afford thioester **6d** (175mg, 94%) as white liquid.  $^1\text{H NMR}$  (400 MHz,  $\text{CDCl}_3$ )  $\delta$ = 8.16-8.14 (m, 2H), 7.69-7.65 (m, 1H), 7.60-7.53 (m, 3H), 7.46-7.43 (m, 2H), 7.37-7.33 (m, 1H), 2.50 (s, 3H);  $^{13}\text{C NMR}$  (100MHz,  $\text{CDCl}_3$ )  $\delta$ = 189.7, 142.7, 136.8, 136.5, 133.7, 130.9, 130.4, 128.8, 127.6, 126.8, 126.7, 20.9; **IR** (neat,  $\text{cm}^{-1}$ ) = 1662; **HRMS** (ESI)  $m/z$  ( $\text{M}+\text{Na}$ )<sup>+</sup> calculated for  $\text{C}_{14}\text{H}_{12}\text{NaOS}$ : 251.0507; found 251.0510.

### S-(4-chlorophenyl) benzothioate(6e)

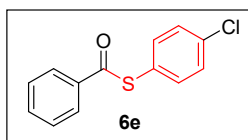

According to the above-mentioned procedure, benzoic acid **1a** (0.8 mmol, 100 mg) upon reaction with CDI (0.8 mmol) & 4-chloro thiol (0.8 mmol) to afford thioester **6e** (194 mg, 96%) as white solid. **mp**-142°C;  $^1\text{H NMR}$  (400 MHz,  $\text{CDCl}_3$ )  $\delta$ = 8.07-8.04 (m, 2H), 7.68-7.60 (m, 1H), 7.53-7.46 (m, 6H);  $^{13}\text{C NMR}$  (100MHz,  $\text{CDCl}_3$ )  $\delta$ = 189.5, 136.4, 136.3, 136.0, 133.9, 129.5, 128.9, 127.6, 125.9; **IR** (neat,  $\text{cm}^{-1}$ )= 1661; **HRMS** (ESI)  $m/z$  ( $\text{M}+\text{Na}$ )<sup>+</sup> calculated for  $\text{C}_{13}\text{H}_9\text{ClNaOS}$ : 270.9960; found 270.9963.

### S-benzyl benzothioate(6f)

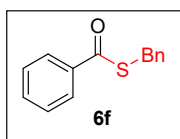

According to the above-mentioned procedure, benzoic acid **1a** (0.8 mmol, 100 mg) upon reaction with CDI (0.8 mmol) & benzyl thiol (0.8 mmol) to afford thioester **6f** (175 mg, 92%) as white liquid.  $^1\text{H NMR}$  (400 MHz,  $\text{CDCl}_3$ )  $\delta$ = 8.03-8.01 (m, 2H), 7.62-7.58 (m, 1H), 7.50-7.34 (m, 7H), 4.37 (s, 2H);  $^{13}\text{C NMR}$  (100MHz,  $\text{CDCl}_3$ )  $\delta$ = 191.4, 137.5, 136.7, 133.5, 129.0, 128.6, 128.7, 127.4, 127.4, 33.4; **IR** (neat,  $\text{cm}^{-1}$ ) = 1654; **HRMS** (ESI)  $m/z$  ( $\text{M}+\text{Na}$ )<sup>+</sup> calculated for  $\text{C}_{14}\text{H}_{12}\text{NaOS}$ : 251.0507; found 251.0511.

### S-(naphthalen-2-yl) benzothioate(6g)

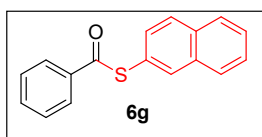

According to the above-mentioned procedure, benzoic acid **1a** (0.8 mmol, 100 mg) upon reaction with CDI (0.8 mmol) & 2-naphthiol (0.8 mmol) to afford thioester **6g** (200 mg, 93%) as white solid. **mp**-191°C; **<sup>1</sup>H NMR** (400 MHz, CDCl<sub>3</sub>) δ= 8.10 (dt, *J*= 7.1Hz, 1.4 Hz, 3H), 7.96-7.87 (m, 3H), 7.65 (d, *J*= 7.4 Hz, 1H), 7.60-7.51 (m, 5H); **<sup>13</sup>C NMR** (100MHz, CDCl<sub>3</sub>) δ= 190.4, 136.6, 135.0, 133.7, 133.6, 133.5, 131.4, 128.9, 128.8, 128.0, 127.8, 127.5, 127.2, 126.5, 124.7; **IR** (neat, cm<sup>-1</sup>) = 1663; **HRMS** (ESI) *m/z* (M+Na)<sup>+</sup> calculated for C<sub>17</sub>H<sub>12</sub>NaOS: 287.0507; found 287.0511.

### 5. General Procedure for the synthesis of thioester **8**:

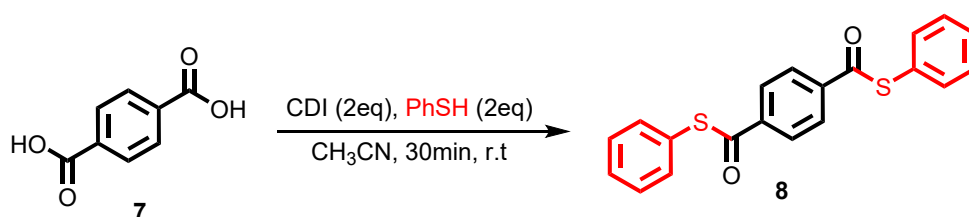

Dry CH<sub>3</sub>CN (3ml) solution of Terephthalic acid **7** (0.6 mmol, 100mg) and CDI (1.2 mmol) was taken in a 50 ml dry round bottom flask fitted with magnetic stir bar under N<sub>2</sub> atmosphere. Then PhSH (1.2 mmol) was added into this mixture. The mixture was stirred at room temperature for 30min. After the total consumption of the starting material **7** as shown by TLC, the mixture was evaporated under reduced pressure & then the reaction mixture was quenched by ethyl acetate followed by water. The combined organic layer was separated, washed with brine solution (twice) and collected over anhydrous sodium sulphate.

The concentrated organic solution was then loaded on a 100-200 mesh column of silica gel & eluted with hexane: ethyl acetate (95:5) to get purified thioester **8** (183 mg, 87%) as white solid.

### S,S-diphenyl benzene-1,4-bis(carbothioate)(**8**)

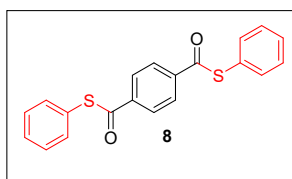

**mp**-302°C; **<sup>1</sup>H NMR** (400 MHz, CDCl<sub>3</sub>) δ= 8.16 (s, 4H), 7.57-7.53 (m, 4H), 7.52-7.50 (m, 6H); **<sup>13</sup>C NMR** (100MHz, CDCl<sub>3</sub>) δ= 189.5, 140.4, 135.0, 129.8, 129.4, 127.8, 126.6; **IR** (neat, cm<sup>-1</sup>) = 1665; **HRMS** (ESI) *m/z* (M+Na)<sup>+</sup> calculated for C<sub>20</sub>H<sub>14</sub>NaO<sub>2</sub>S<sub>2</sub>: 373.0333; found 373.0336.

## 6. General Procedure for the synthesis of thioester **10a**:

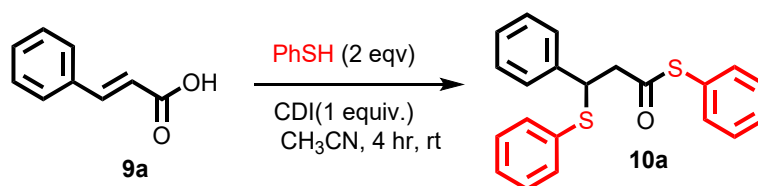

Dry CH<sub>3</sub>CN (3ml) solution of Cinnamic acid **9a** (0.6 mmol, 100mg) and CDI (0.6 mmol) was taken in a 50 ml dry round bottom flask fitted with magnetic stir bar under N<sub>2</sub> atmosphere. Then PhSH (1.34 mmol) was added into this mixture. The mixture was stirred at room temperature for 4 hr. After the total consumption of the starting material **9a** as shown by TLC, the mixture was evaporated under reduced pressure & then the reaction mixture was quenched by ethyl acetate followed by water. The combined organic layer was separated, washed with brine solution (twice) and collected over anhydrous sodium sulphate.

The concentrated organic solution was then loaded on a 100-200 mesh column of silica gel & eluted with hexane: ethyl acetate (98:2) to get purified thioester **10a** (204 mg, 86%) as white solid.

### S-phenyl 3-phenyl-3-(phenylthio)propanethioate(**10a**)

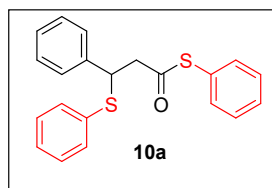

**mp**-235°C; **<sup>1</sup>H NMR** (400 MHz, CDCl<sub>3</sub>) δ= 7.42-7.36 (m, 5H), 7.34-7.25 (m, 10H), 4.79 (t, *J*= 7.6 Hz, 1H), 3.30 (d, *J*= 7.6 Hz, 2H); **<sup>13</sup>C NMR** (100MHz, CDCl<sub>3</sub>) δ= 194.7, 139.9, 134.4, 133.6, 133.2, 129.5, 129.2, 128.9, 128.6, 127.8, 127.8, 127.7, 127.3, 49.4, 49.2; **IR** (neat, cm<sup>-1</sup>) = 1710; **HRMS** (ESI) *m/z* (M+Na)<sup>+</sup> calculated for C<sub>21</sub>H<sub>18</sub>NaOS<sub>2</sub>: 373.0697; found 373.0699.

## 7. Characterization data of thioester **10b-10f**

### S-phenyl 3-(furan-2-yl)-3-(phenylthio)propanethioate(**10b**)

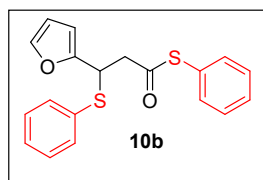

According to the above-mentioned procedure, alpha beta unsaturated acid **9b** (0.7 mmol, 100 mg) upon reaction with CDI (0.7 mmol) & thiophenol (1.44 mmol) to afford thioester **10b** (201 mg, 82%) as yellowish liquid. **<sup>1</sup>H NMR** (400 MHz, CDCl<sub>3</sub>) δ= 7.42 (tt, *J*= 5.2, 2.6 Hz, 6H), 7.38-7.35 (m, 2H), 7.31 (dd, *J*= 5.3, 1.9 Hz, 3H), 6.29 (dd, *J*= 3.3, 1.9 Hz, 1H), 6.06 (d, *J*= 3.3 Hz, 1H), 4.81 (t, *J*= 7.5 Hz, 1H), 3.36-3.20 (m, 2H); **<sup>13</sup>C NMR** (100MHz, CDCl<sub>3</sub>) δ= 194.3, 152.3, 142.3, 134.4, 134.2, 132.5, 129.6, 129.3, 128.9, 128.3, 127.2, 110.3, 107.7, 46.8, 42.5; **IR** (neat, cm<sup>-1</sup>) = 1701; **HRMS** (ESI) *m/z* (M+Na)<sup>+</sup> calculated for C<sub>19</sub>H<sub>16</sub>NaO<sub>2</sub>S<sub>2</sub>: 363.0489; found 363.0493.

### S-phenyl 3-(phenylthio)-3-(thiophen-2-yl)propanethioate(10c)

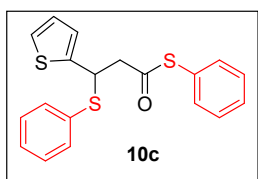

According to the above-mentioned procedure, alpha beta unsaturated acid **9c** (0.6 mmol, 100 mg) upon reaction with CDI (0.6 mmol) & thiophenol (1.29 mmol) to afford thioester **10c** (195 mg, 84%) as brownish liquid.  $^1\text{H NMR}$  (400 MHz,  $\text{CDCl}_3$ )  $\delta$ = 7.44 (ddt,  $J$ = 8.2, 5.4, 2.7 Hz, 7H), 7.35-7.32 (m, 3H), 7.26 (dd,  $J$ = 5.0, 1.3 Hz, 1H), 6.93-6.89 (m, 2H), 5.12 (t,  $J$ = 7.4 Hz, 1H), 3.36 (d,  $J$ = 7.4 Hz, 2H);  $^{13}\text{C NMR}$  (100MHz,  $\text{CDCl}_3$ )  $\delta$ = 194.3, 144.1, 134.5, 133.5, 133.3, 129.7, 129.3, 129.1, 128.3, 127.3, 126.7, 125.8, 125.1, 50.4, 44.6; **IR** (neat,  $\text{cm}^{-1}$ ) = 1700; **HRMS** (ESI)  $m/z$  ( $\text{M}+\text{Na}$ ) $^+$  calculated for  $\text{C}_{19}\text{H}_{16}\text{NaOS}_3$ : 379.0261; found 379.0265.

### S-phenyl 3-(phenylthio)propanethioate(10d)

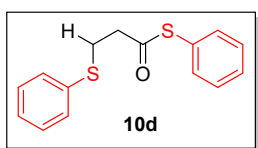

According to the above-mentioned procedure, alpha beta unsaturated acid **9d** (1.38 mmol, 100 mg) upon reaction with CDI (1.38 mmol) & thiophenol (2.77 mmol) to afford thioester **10d** (295 mg, 78%) as white liquid.  $^1\text{H NMR}$  (400 MHz,  $\text{CDCl}_3$ )  $\delta$ = 7.45-7.39 (m, 7H), 7.34 (t,  $J$ = 7.5 Hz, 2H), 7.26 (td,  $J$ = 6.5, 2.9 Hz, 1H), 3.25 (dd,  $J$ = 8.1, 6.8 Hz, 2H), 2.98 (dd,  $J$ = 8.1, 6.8 Hz, 2H);  $^{13}\text{C NMR}$  (100MHz,  $\text{CDCl}_3$ )  $\delta$ = 195.8, 134.9, 134.5, 130.2, 129.5, 129.2, 129.1, 127.2, 126.7, 43.2, 29.2; **IR** (neat,  $\text{cm}^{-1}$ ) = 1701; **HRMS** (ESI)  $m/z$  ( $\text{M}+\text{Na}$ ) $^+$  calculated for  $\text{C}_{15}\text{H}_{14}\text{NaOS}_2$ : 297.0384; found 297.0388.

### S-phenyl 3-(phenylthio)butanethioate(10e)

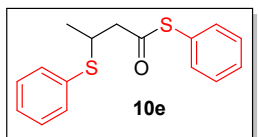

According to the above-mentioned procedure, alpha beta unsaturated acid **9e** (1.16 mmol, 100 mg) upon reaction with CDI (1.16 mmol) & thiophenol (2.32 mmol) to afford thioester **10e** (267 mg, 80%) as white liquid.  $^1\text{H NMR}$  (400 MHz,  $\text{CDCl}_3$ )  $\delta$ = 7.50-7.47 (m, 2H), 7.46-7.40 (m, 5H), 7.38-7.31 (m, 3H), 3.76 (ddd,  $J$ = 8.8, 6.8, 5.3 Hz, 1H), 3.03-2.76 (m, 2H), 1.41 (d,  $J$ = 6.8 Hz, 3H);  $^{13}\text{C NMR}$  (100MHz,  $\text{CDCl}_3$ )  $\delta$ = 195.5, 134.5, 133.6, 132.7, 129.5, 129.3, 129.1, 127.5, 127.4, 50.3, 39.7, 20.6; **IR** (neat,  $\text{cm}^{-1}$ ) = 1703; **HRMS** (ESI)  $m/z$  ( $\text{M}+\text{Na}$ ) $^+$  calculated for  $\text{C}_{16}\text{H}_{16}\text{NaOS}_2$ : 311.0540; found 311.0544.

### S-phenyl 3-(phenylthio)hexanethioate(10f)

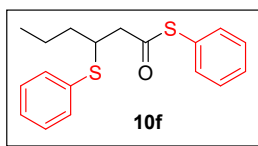

According to the above-mentioned procedure, alpha beta unsaturated acid **9f** (0.8 mmol, 100 mg) upon reaction with CDI (0.8 mmol) & thiophenol (1.75 mmol) to afford thioester **10f** (224 mg, 81%) as white liquid.  $^1\text{H NMR}$  (400 MHz,  $\text{CDCl}_3$ )  $\delta$ = 7.47 (dt,  $J$ = 7.3, 1.4 Hz, 2H), 7.44-7.39 (m, 5H), 7.39-7.28 (m, 3H), 2.99-2.84 (m, 2H), 1.69-1.50 (m, 5H), .95 (t,  $J$ = 7.0 Hz, 3H);  $^{13}\text{C NMR}$  (100MHz,  $\text{CDCl}_3$ )  $\delta$ = 195.6, 135.1, 134.4, 133.9, 132.6, 129.5, 129.3, 129.0, 127.4, 49.1, 44.8, 36.5, 20.1, 13.7; **IR** (neat,  $\text{cm}^{-1}$ ) = 1705; **HRMS** (ESI)  $m/z$  ( $\text{M}+\text{Na}$ ) $^+$  calculated for  $\text{C}_{18}\text{H}_{20}\text{NaOS}_2$ : 339.0853; found 339.0857.

## 8. Copies of $^1\text{H}$ & $^{13}\text{C}$ NMR:

### 2a - $^1\text{H}$ & $^{13}\text{C}$ NMR

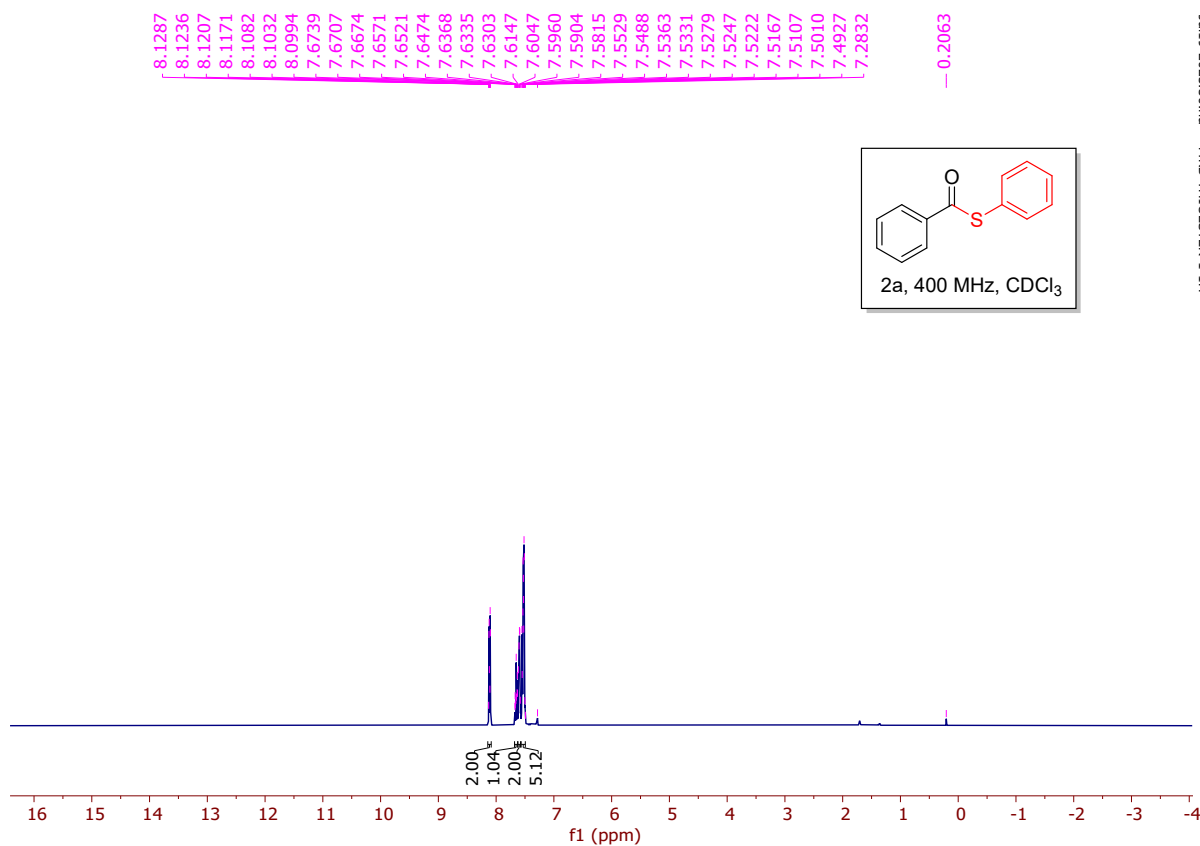

Jul19-2023.30.fid — MKB-THIOESTER-1-1H

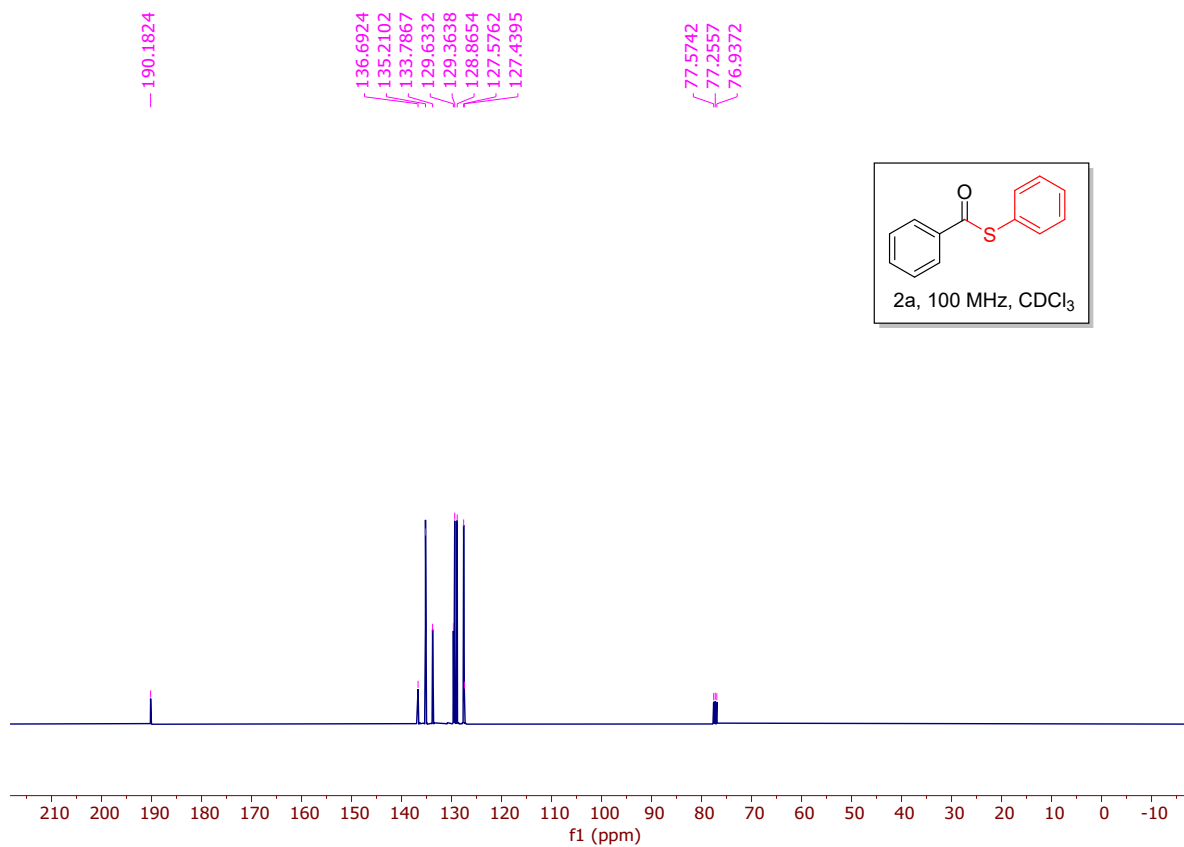

Jul31-2023.20.fid — MKB-thioester-1-13C

2b -  $^1\text{H}$  &  $^{13}\text{C}$  NMR

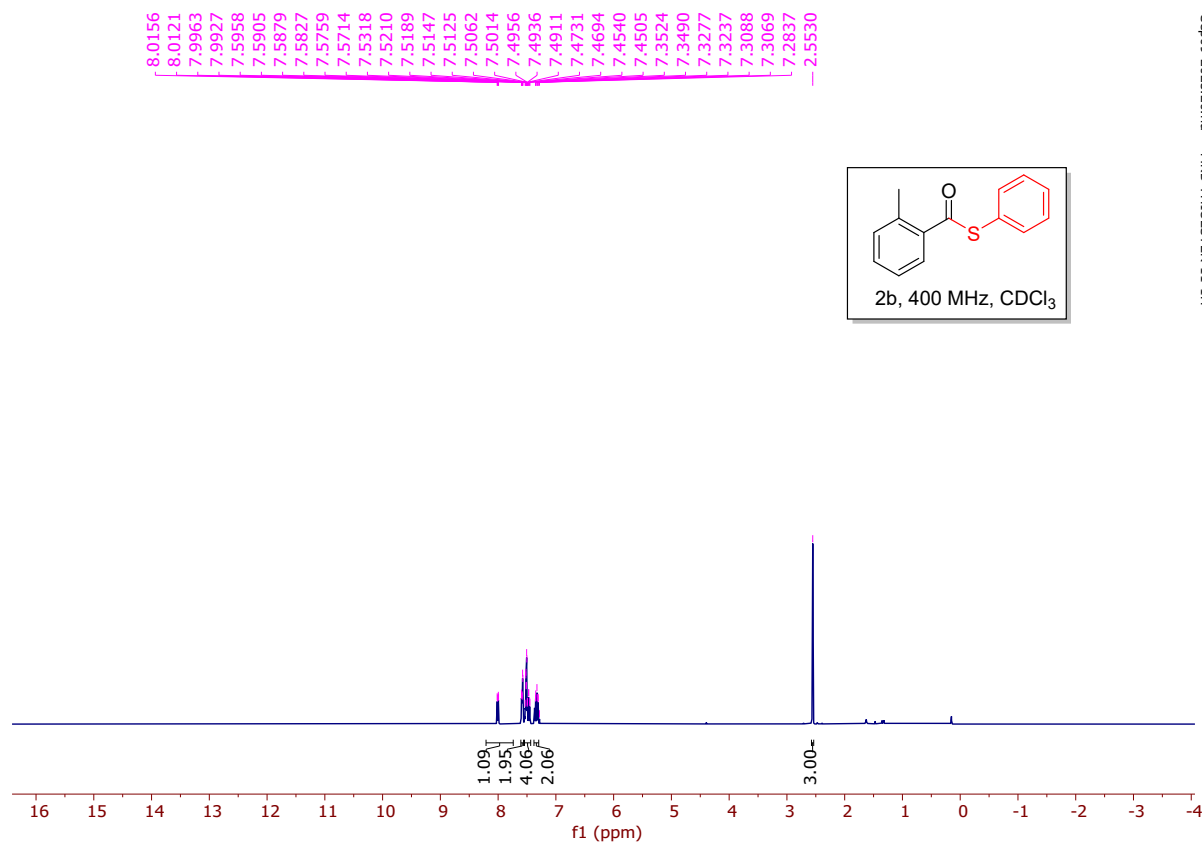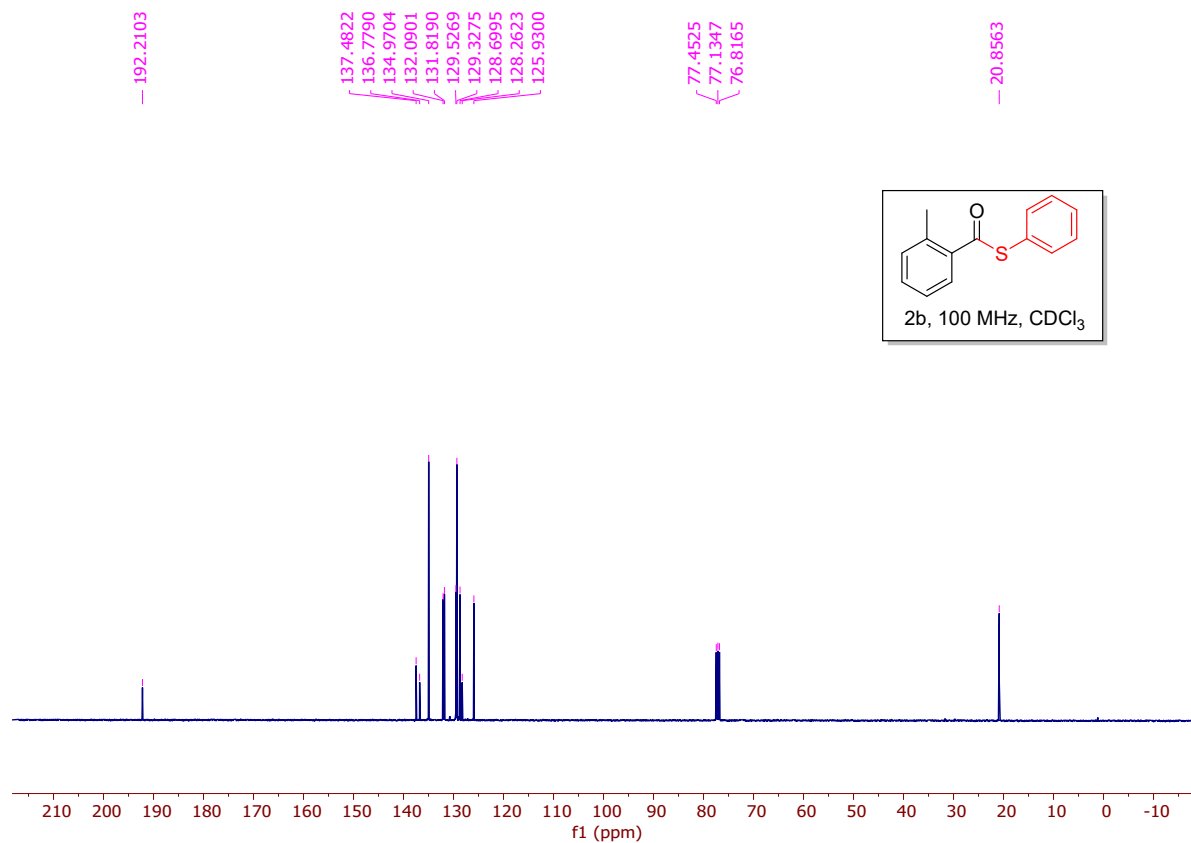

Sep09-2023.20.fid — MKB-THIOESTER-11-1H

Sep09-2023.60.fid — MKB-THIOESTER-11-13C



2c - <sup>1</sup>H & <sup>13</sup>C NMR

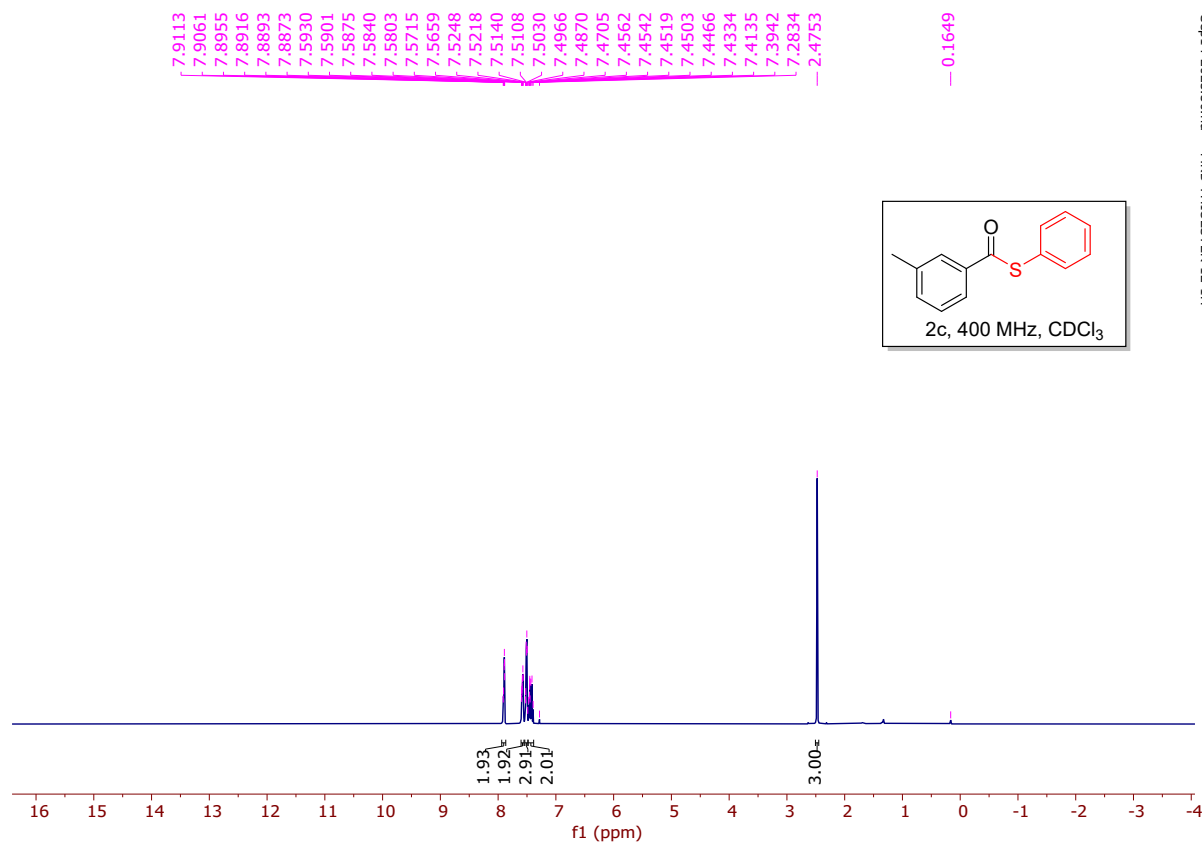

Sep14-2023.30.fid — MKB-THIOESTER-12-1H

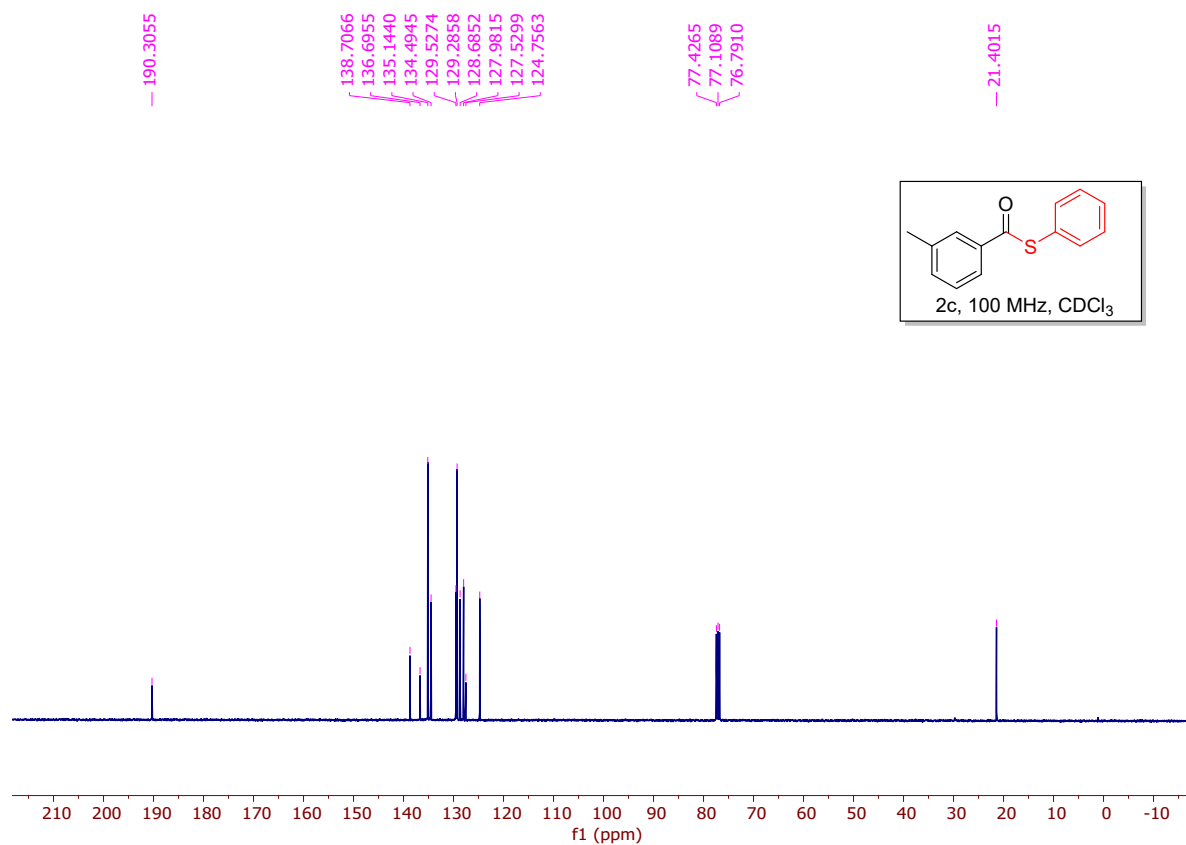

Sep18-2023.20.fid — MKB-thioester-12-13C

2d - <sup>1</sup>H & <sup>13</sup>C NMR

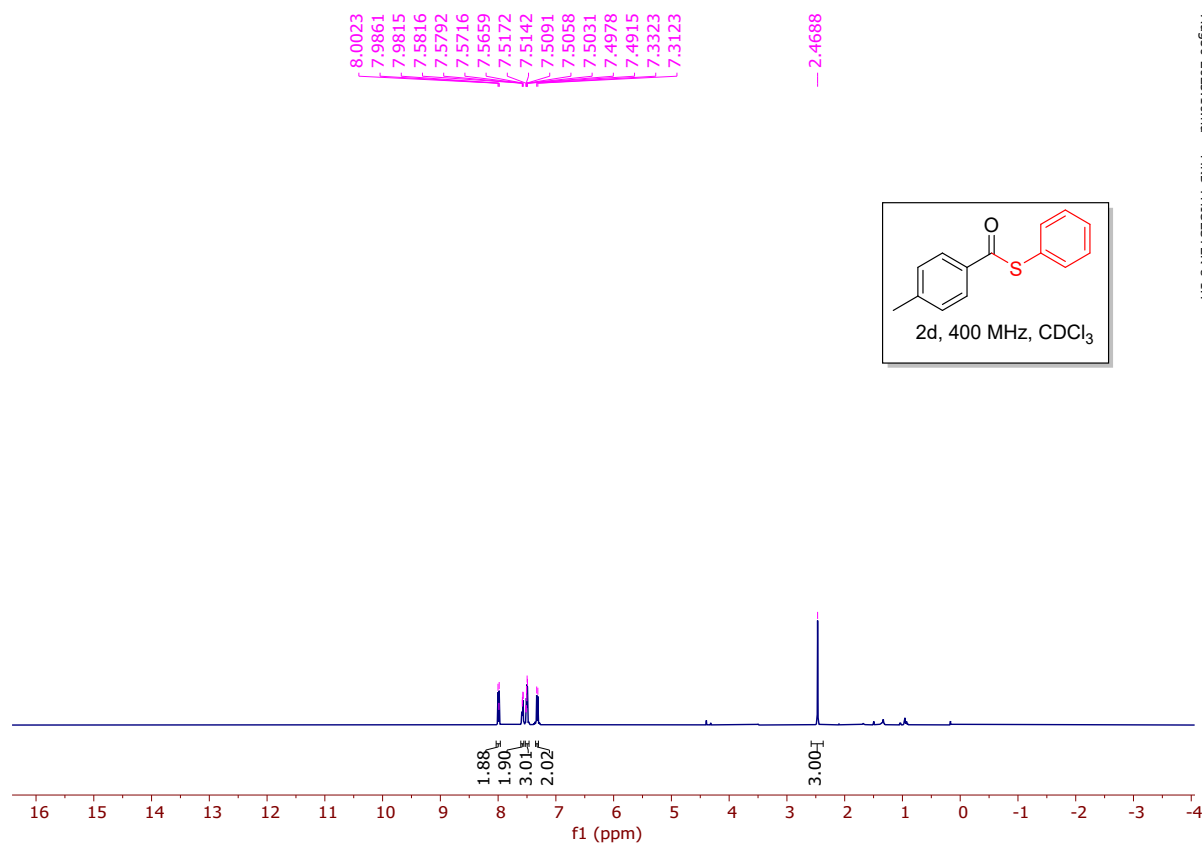

AUG30-2023-10.FID — MK8-THIOESTER-8-1H

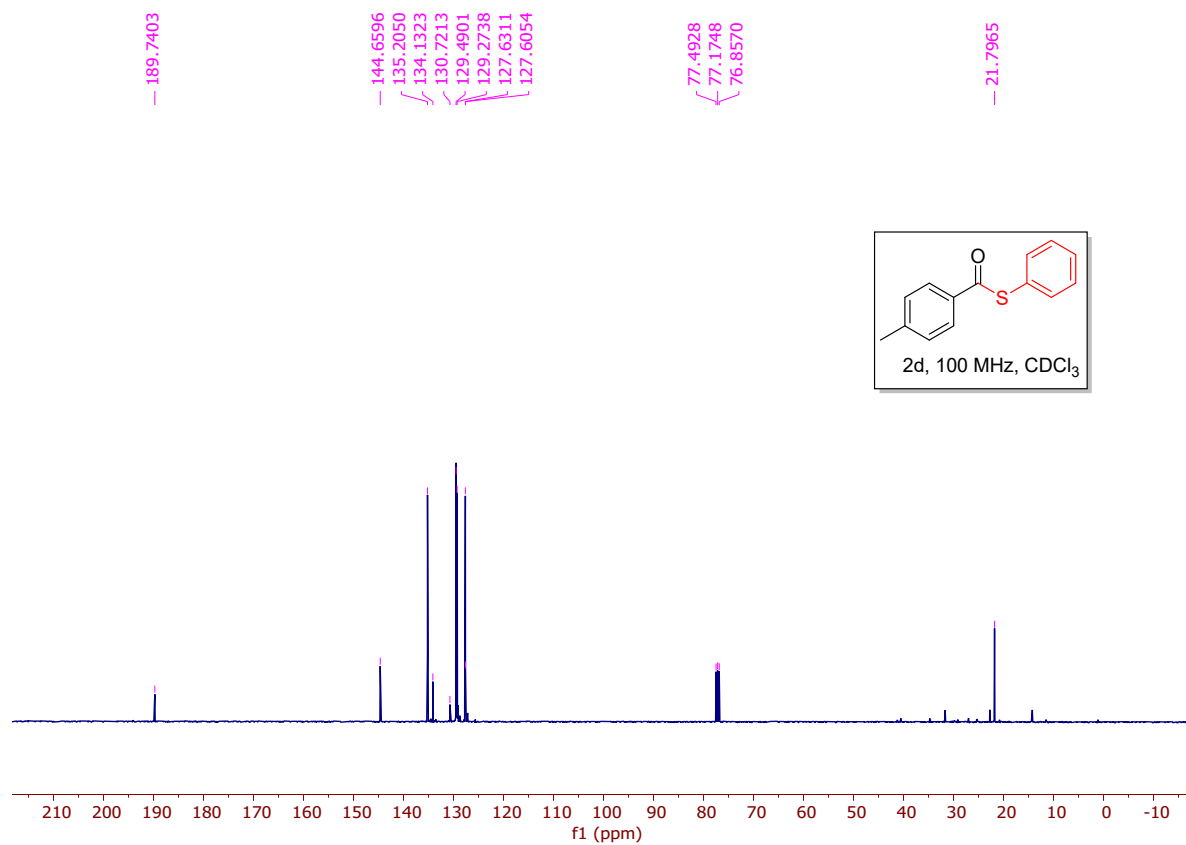

AUG30-2023-10.FID — MK8-THIOESTER-8-13C

2e -  $^1\text{H}$  &  $^{13}\text{C}$  NMR

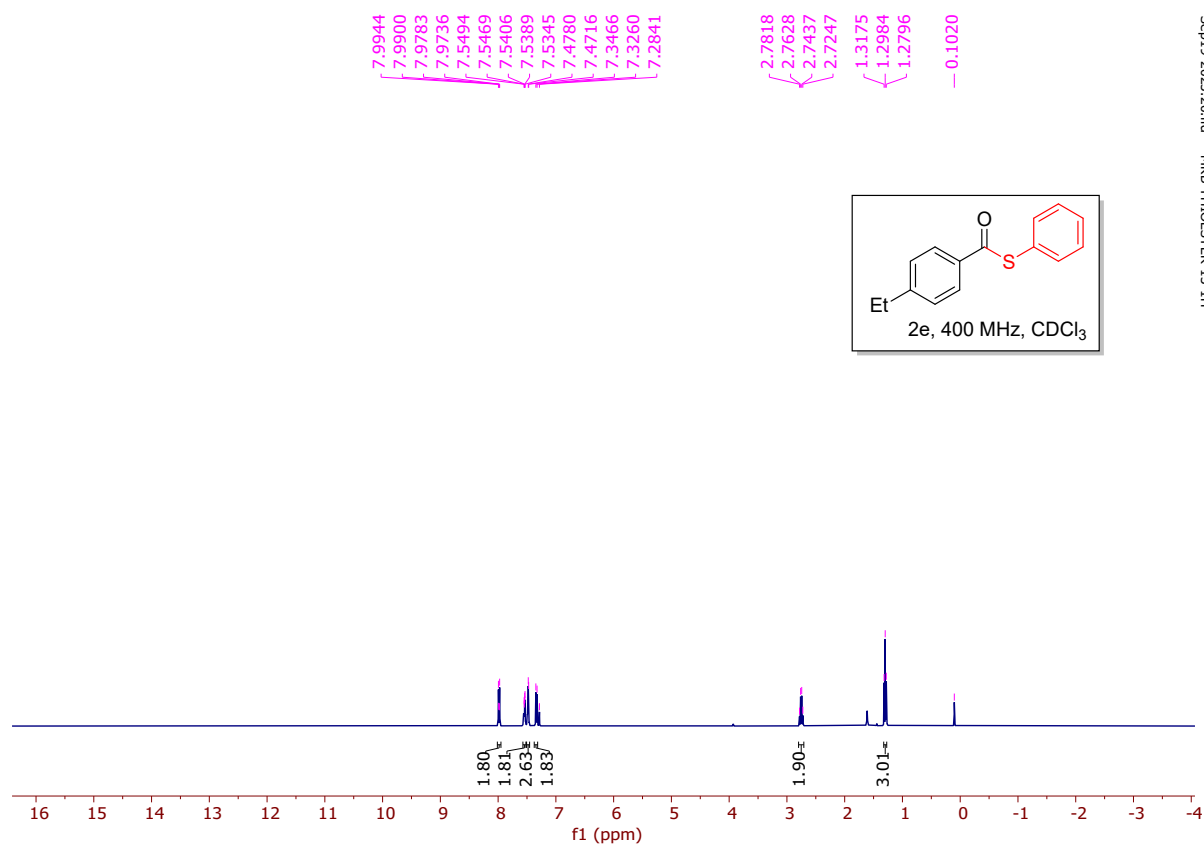

Sep19-2023.20.fid — MKB-Thioester-13-1H

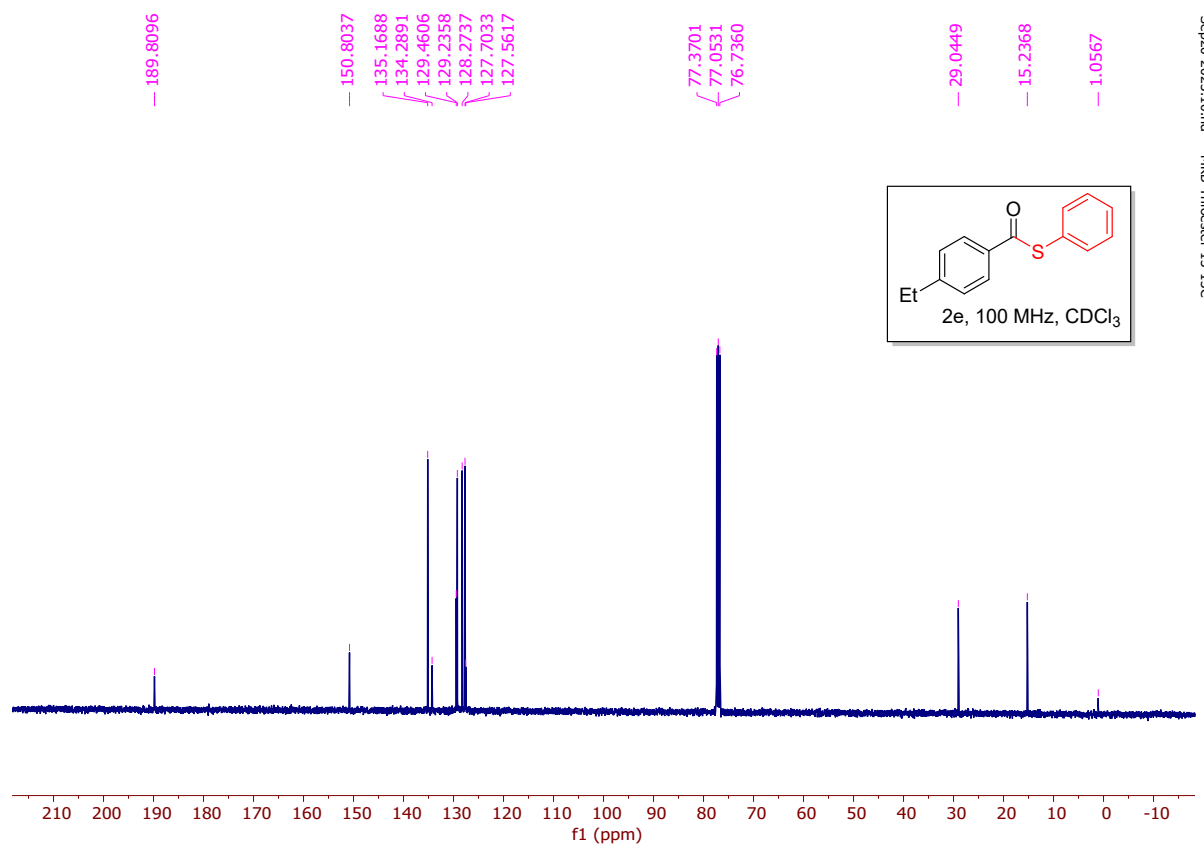

Sep20-2023.10.fid — MKB-Thioester-13-13C

2f - <sup>1</sup>H & <sup>13</sup>C NMR

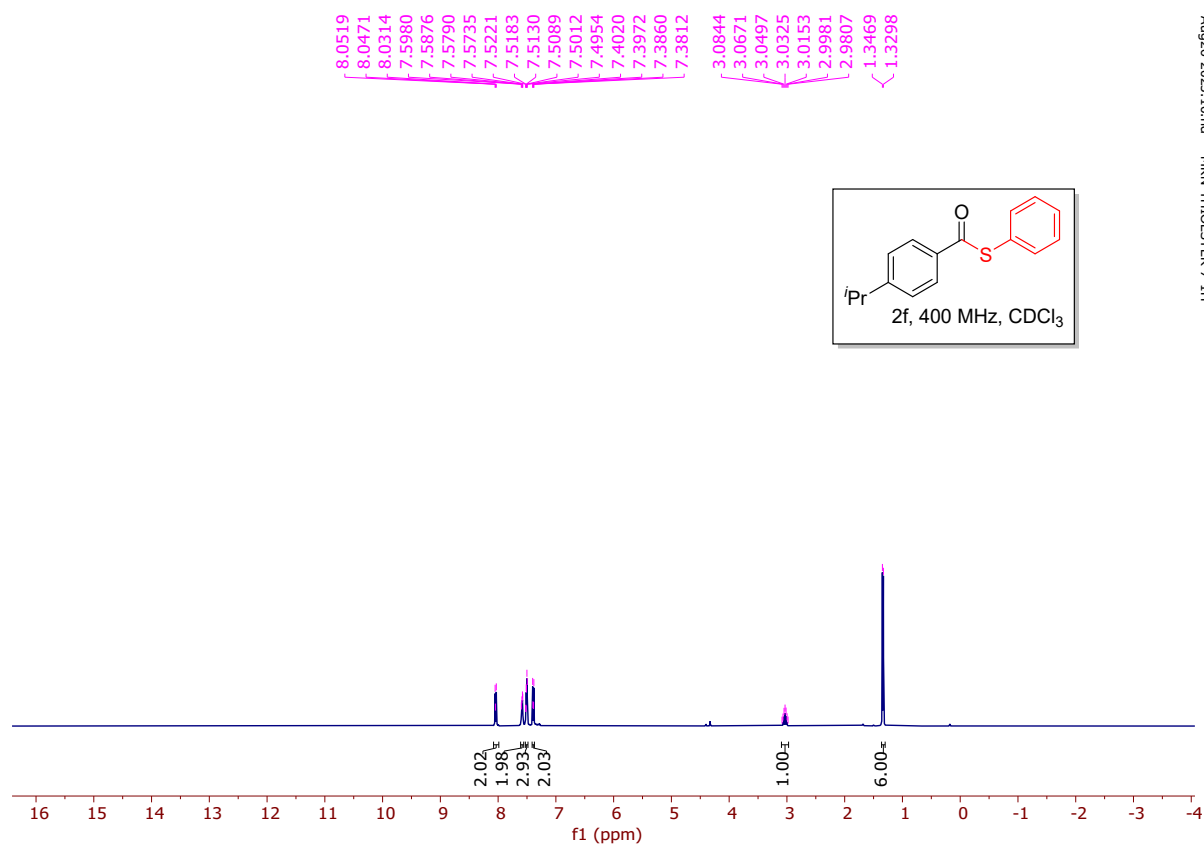

Aug26-2023.10.fid — MKK-THIOESTER-7-1H

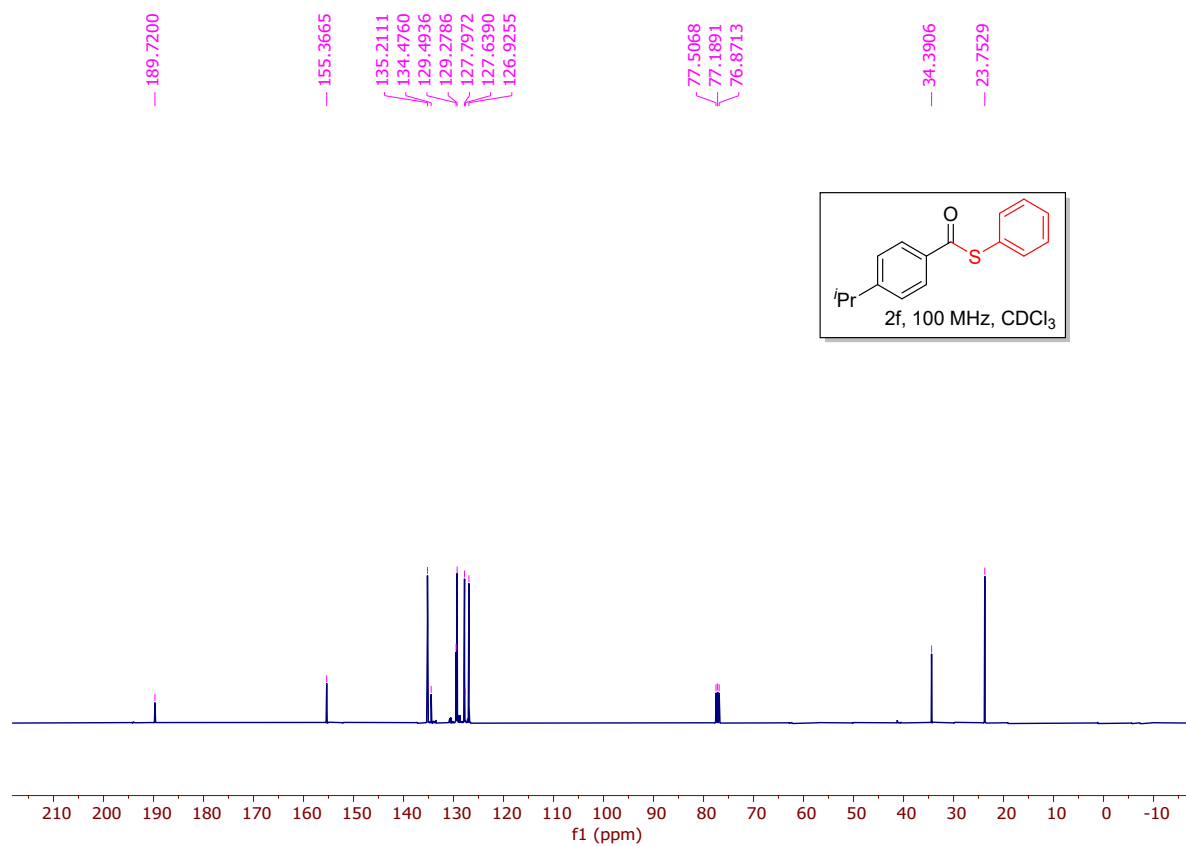

Aug26-2023.50.fid — MKK-THIOESTER-7-13C

2g -  $^1\text{H}$  &  $^{13}\text{C}$  NMR

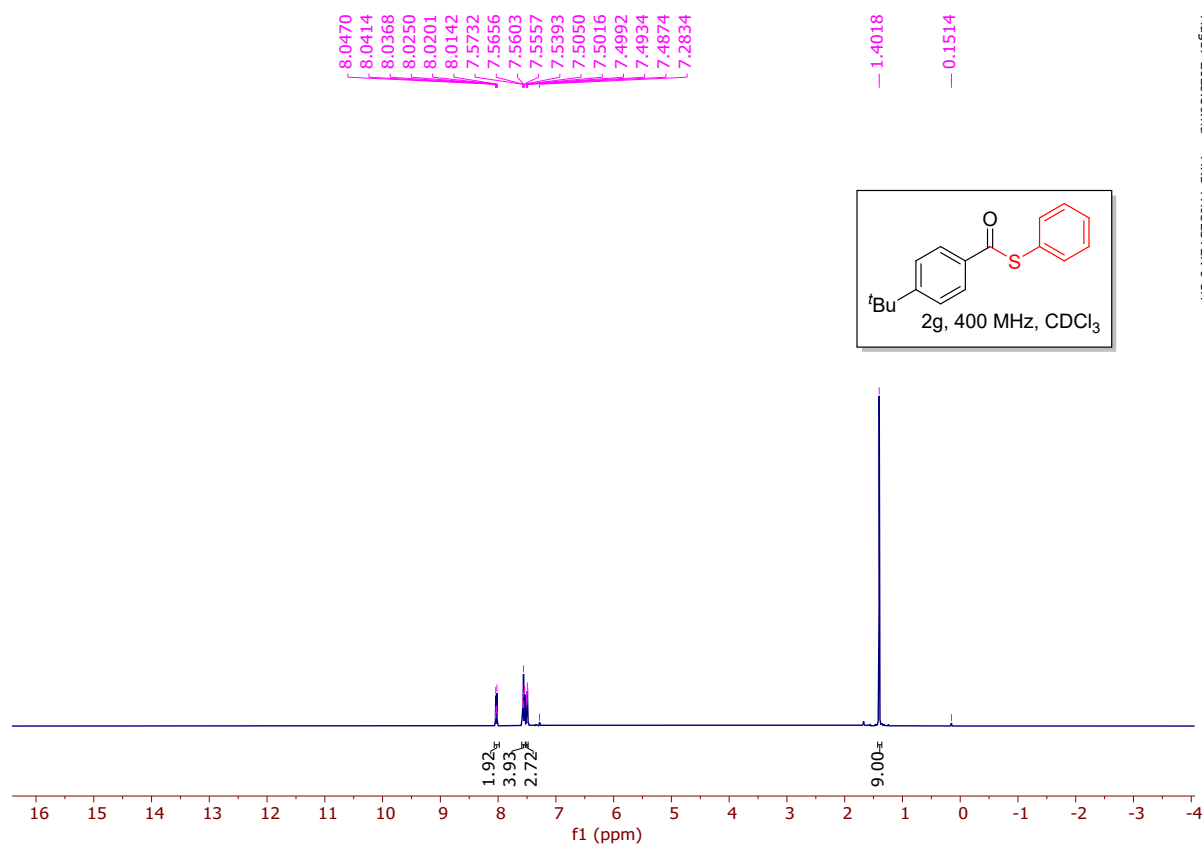

Aug17-2023.30.fid — MKB-THIOESTER-6-1H

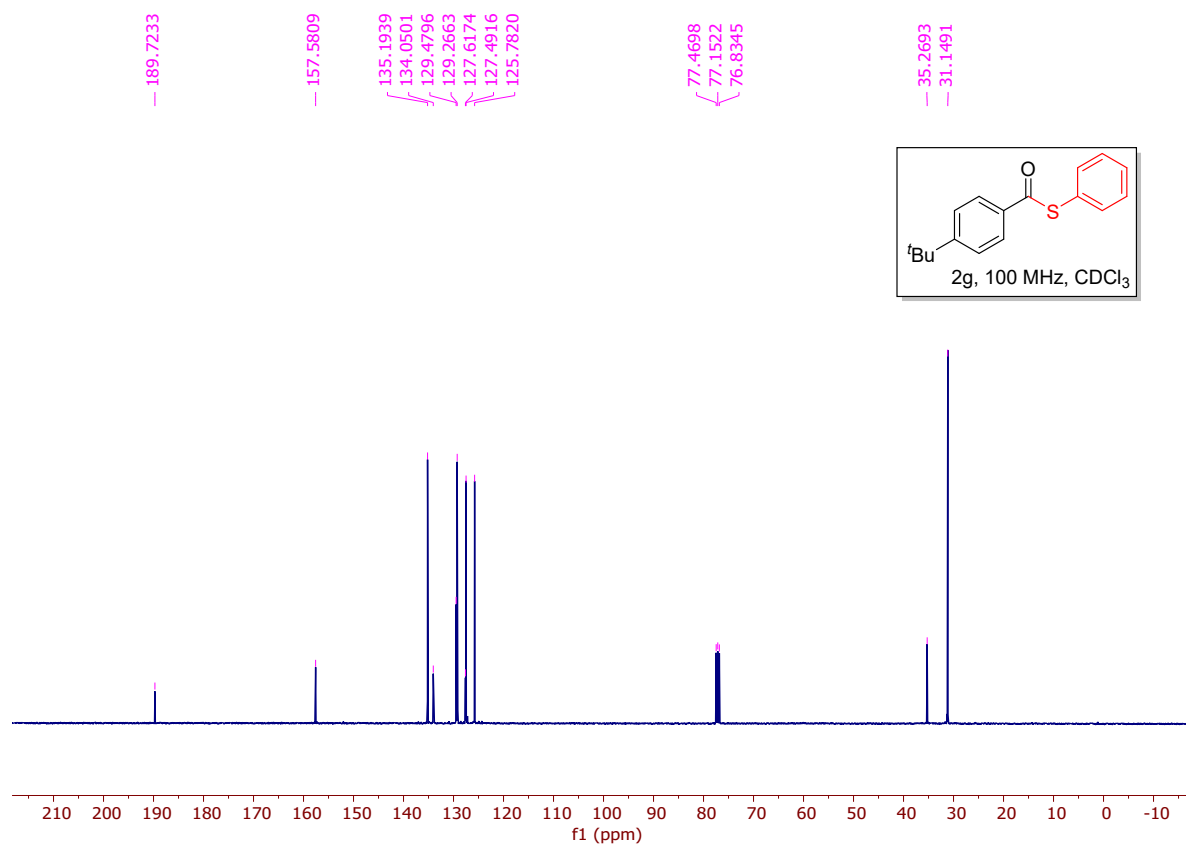

Aug22-2023.50.fid — MKB-THIOESTER-6-13C

**2h - <sup>1</sup>H & <sup>13</sup>C NMR**

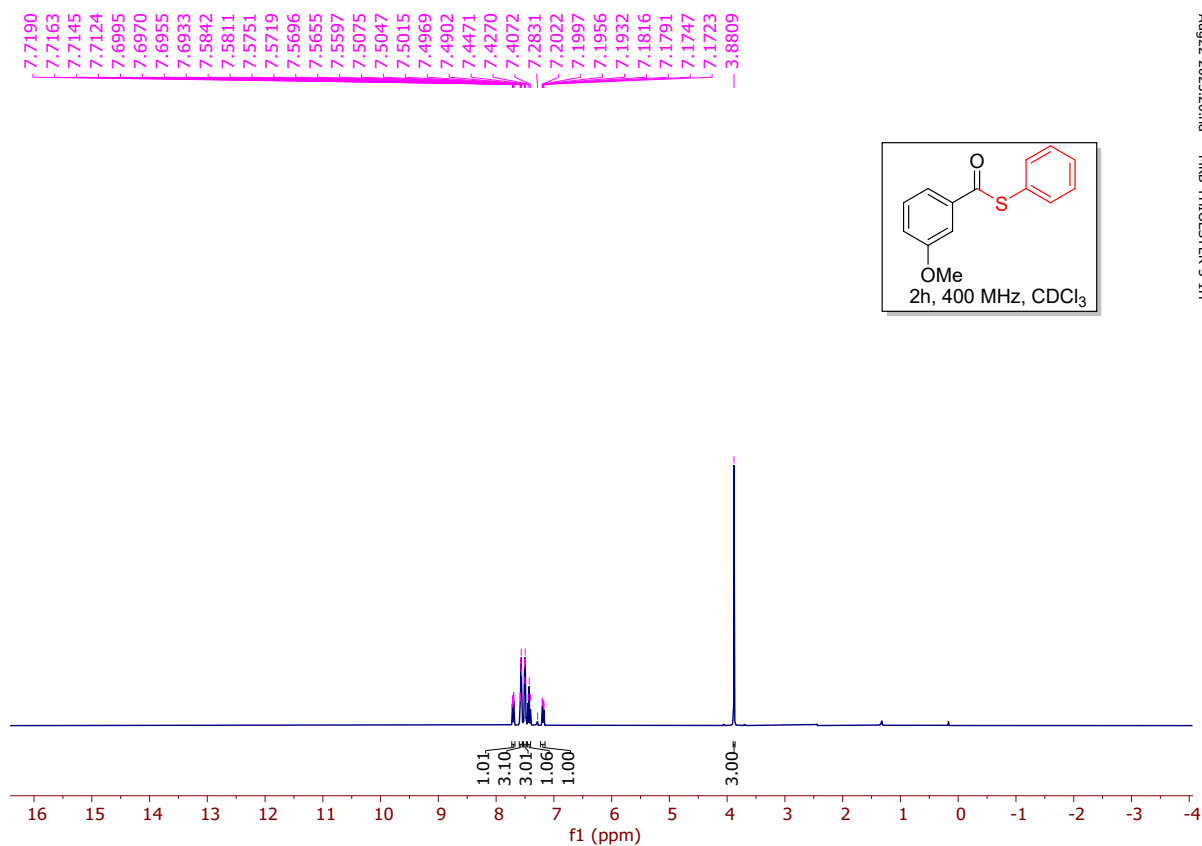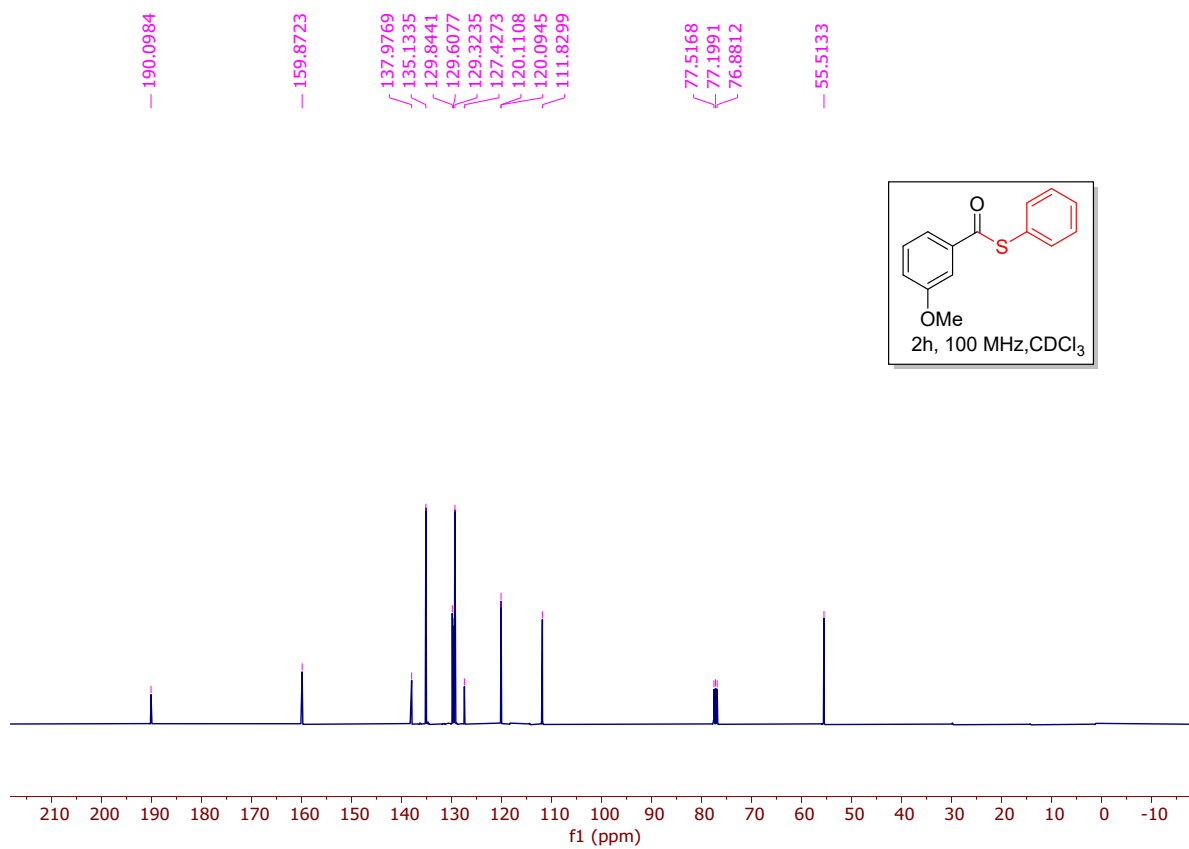

Aug22-2023,20.fid — MKB-THIOESTER-5-1H

Aug30-2023,30.fid — MKB-THIOESTER-5-13C

2i - <sup>1</sup>H & <sup>13</sup>C NMR

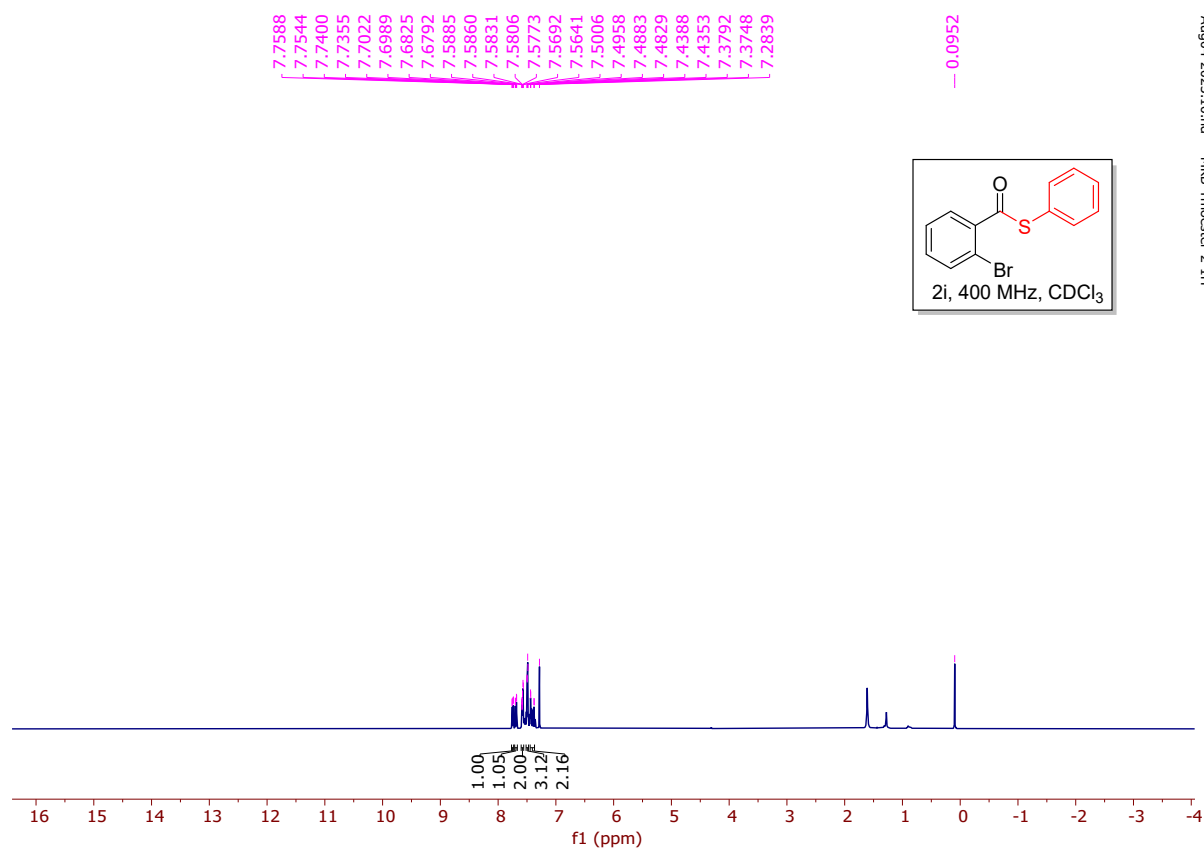

Aug04-2023.10.fid — MKB-THIOESTER-2-1H

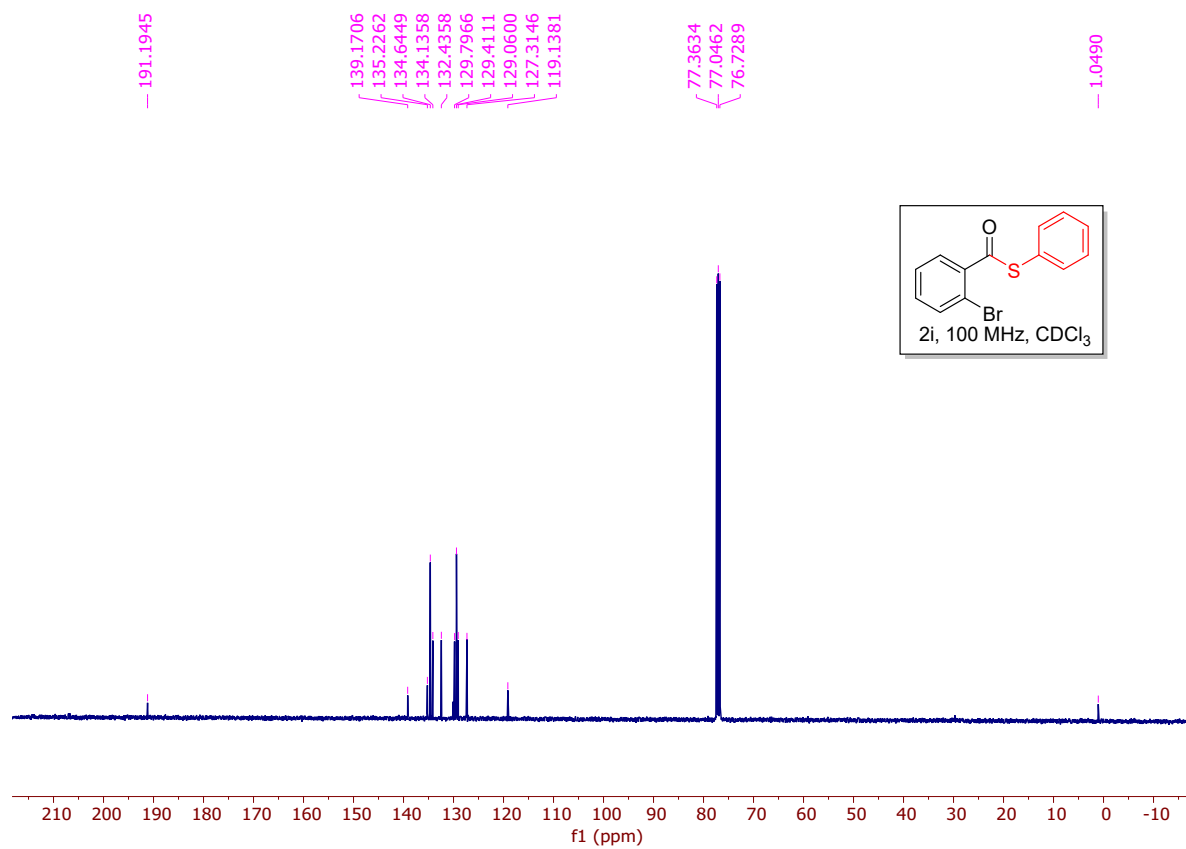

Aug07-2023.50.fid — MKB-THIOESTER-2-13C

# 2j - <sup>1</sup>H & <sup>13</sup>C NMR

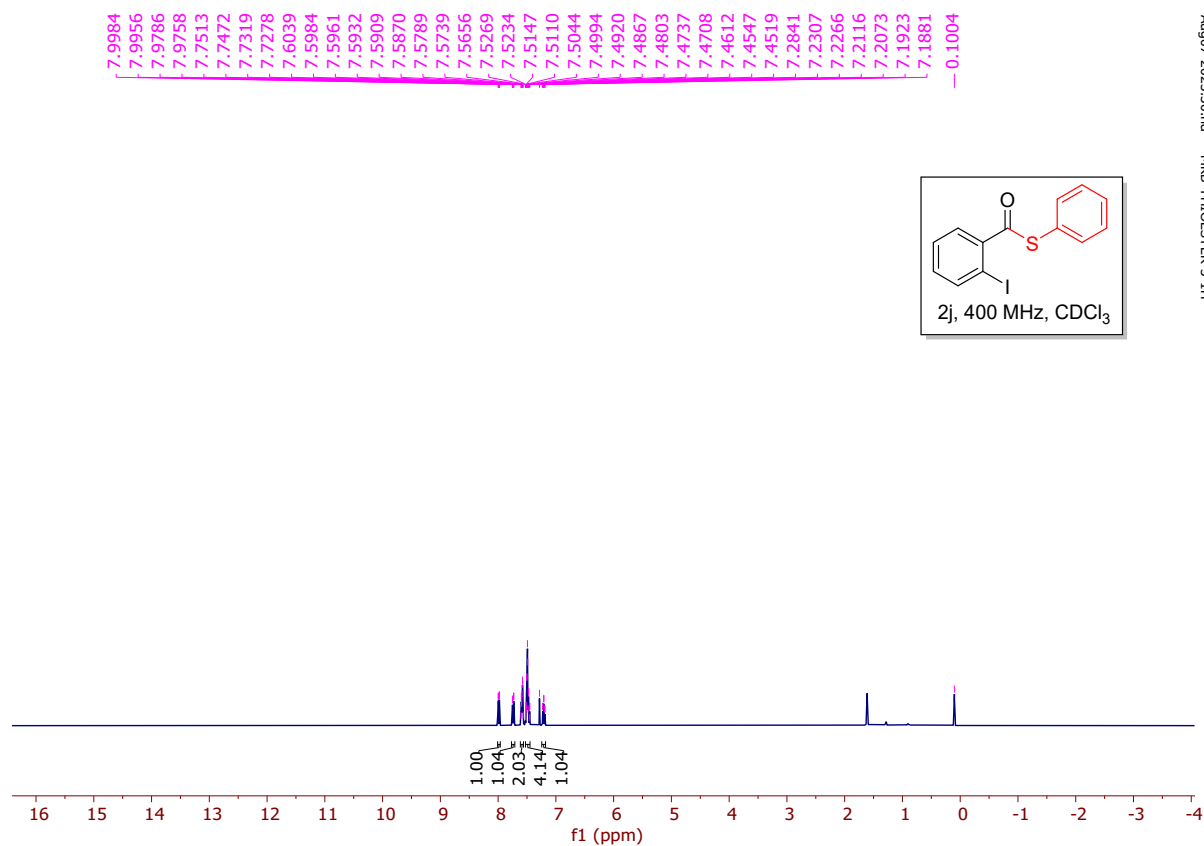

Aug07-2023-30.fid — MKB-THIOESTER-3-1H

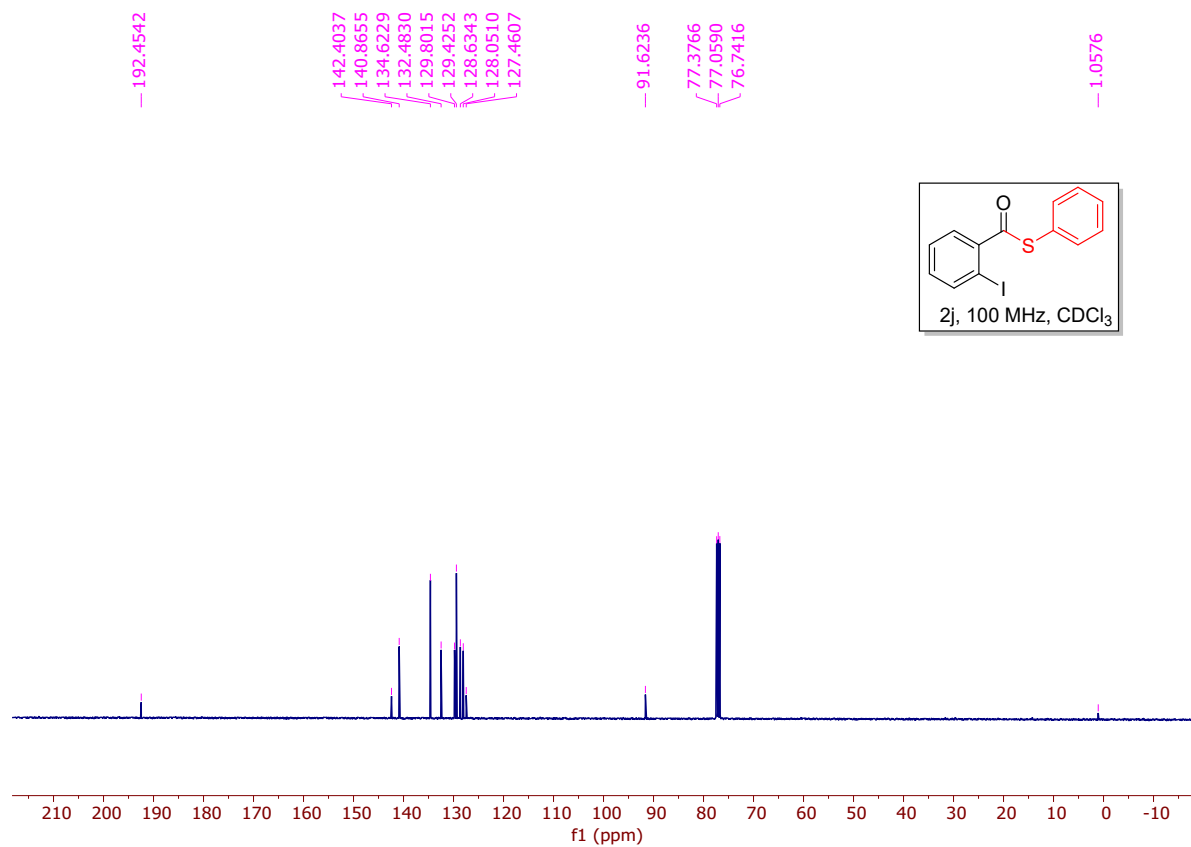

Aug11-2023-40.fid — MKB-thioester-3-13C



2k - <sup>1</sup>H & <sup>13</sup>C NMR

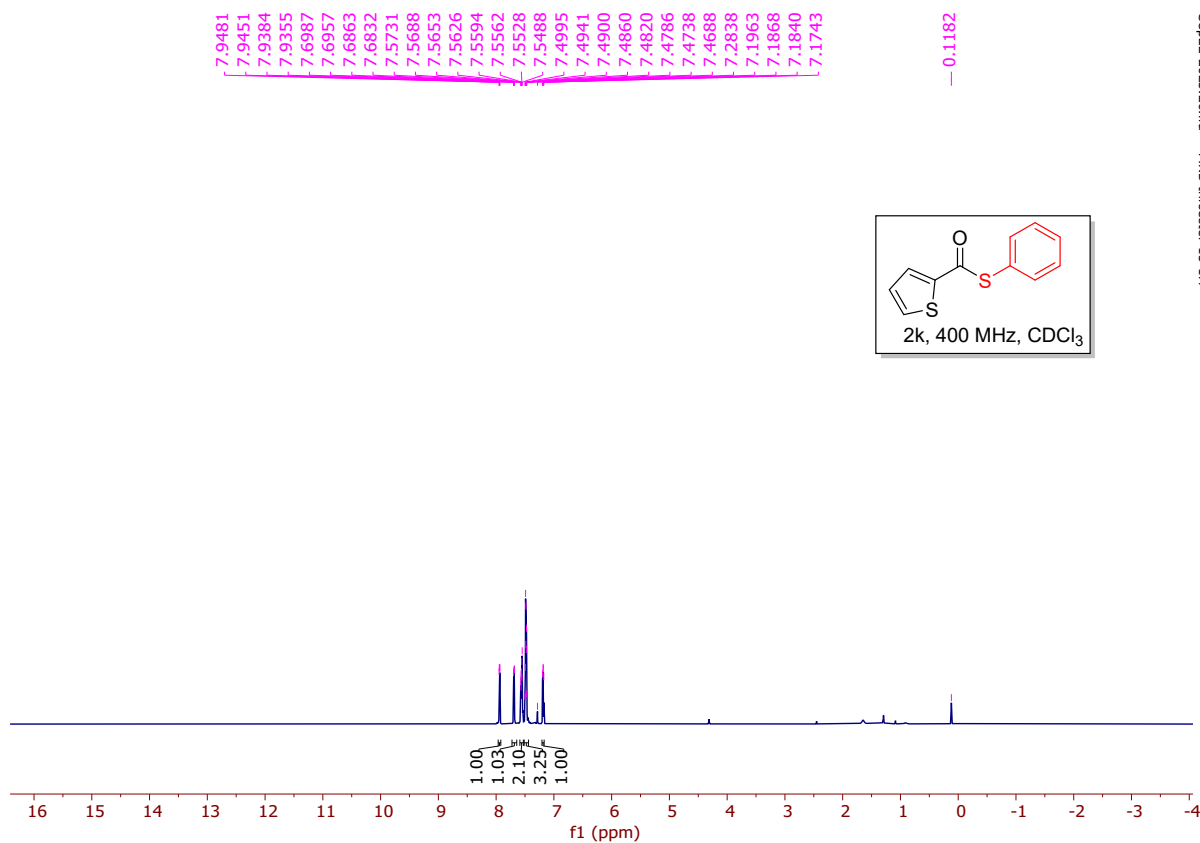

Sep22-2023.20.fid — MKB-thioester-15-1H

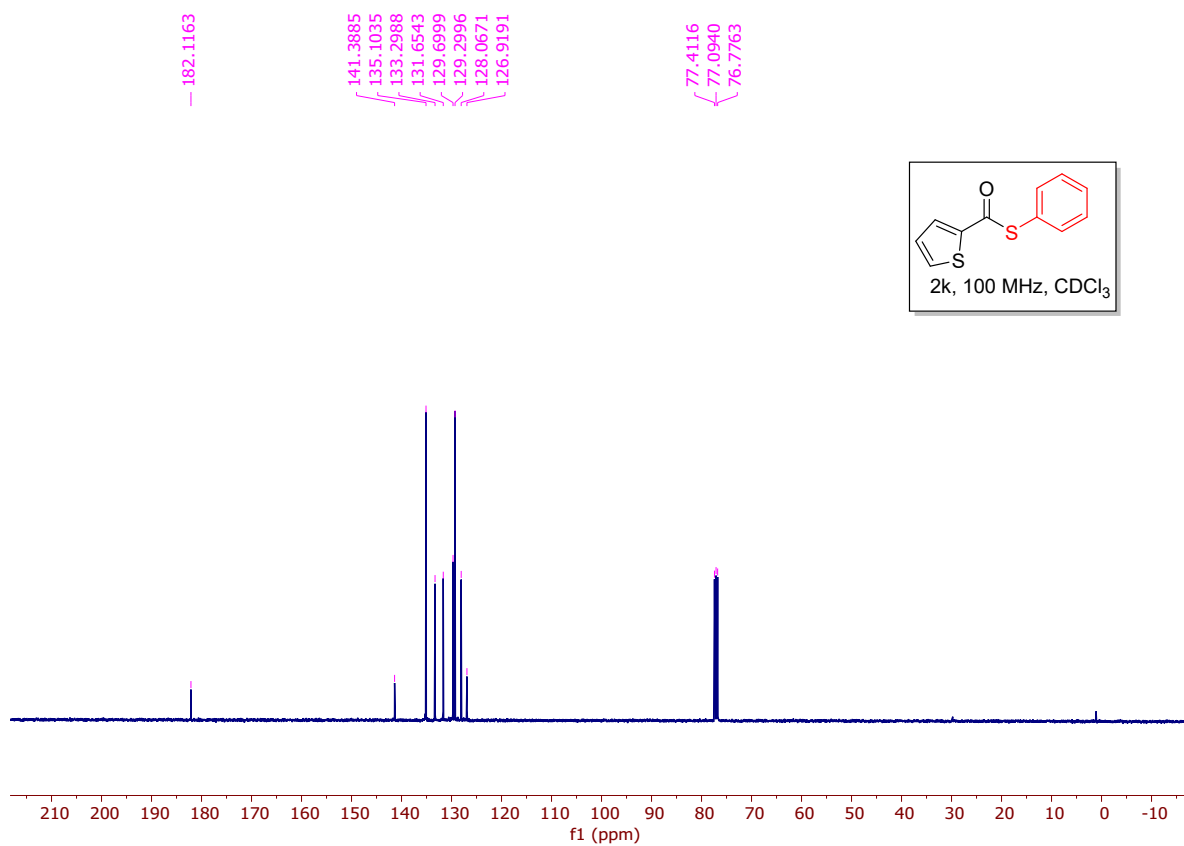

Sep29-2023.61.fid — MKB-thioester-15-13C

2I - <sup>1</sup>H & <sup>13</sup>C NMR

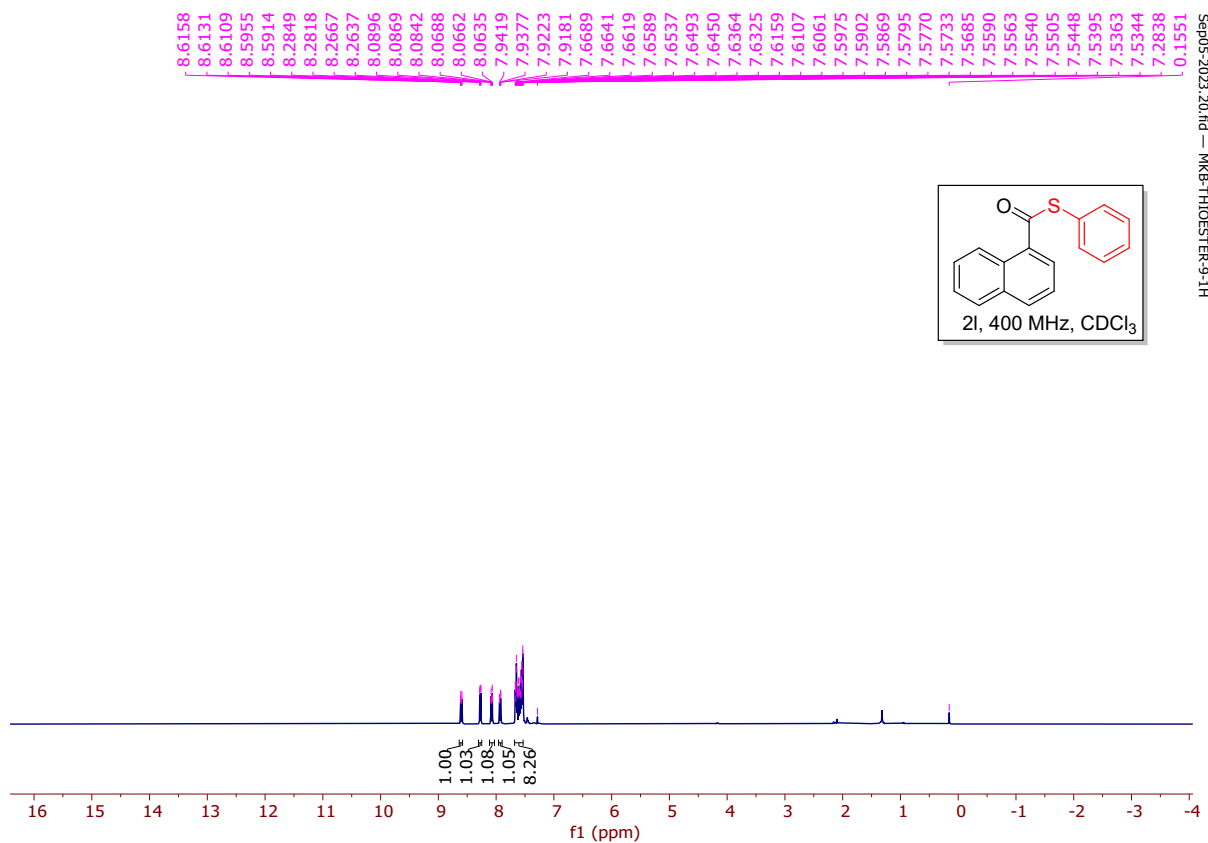

Sep05-2023-20.fid — MKB-THIOESTER-9-1H

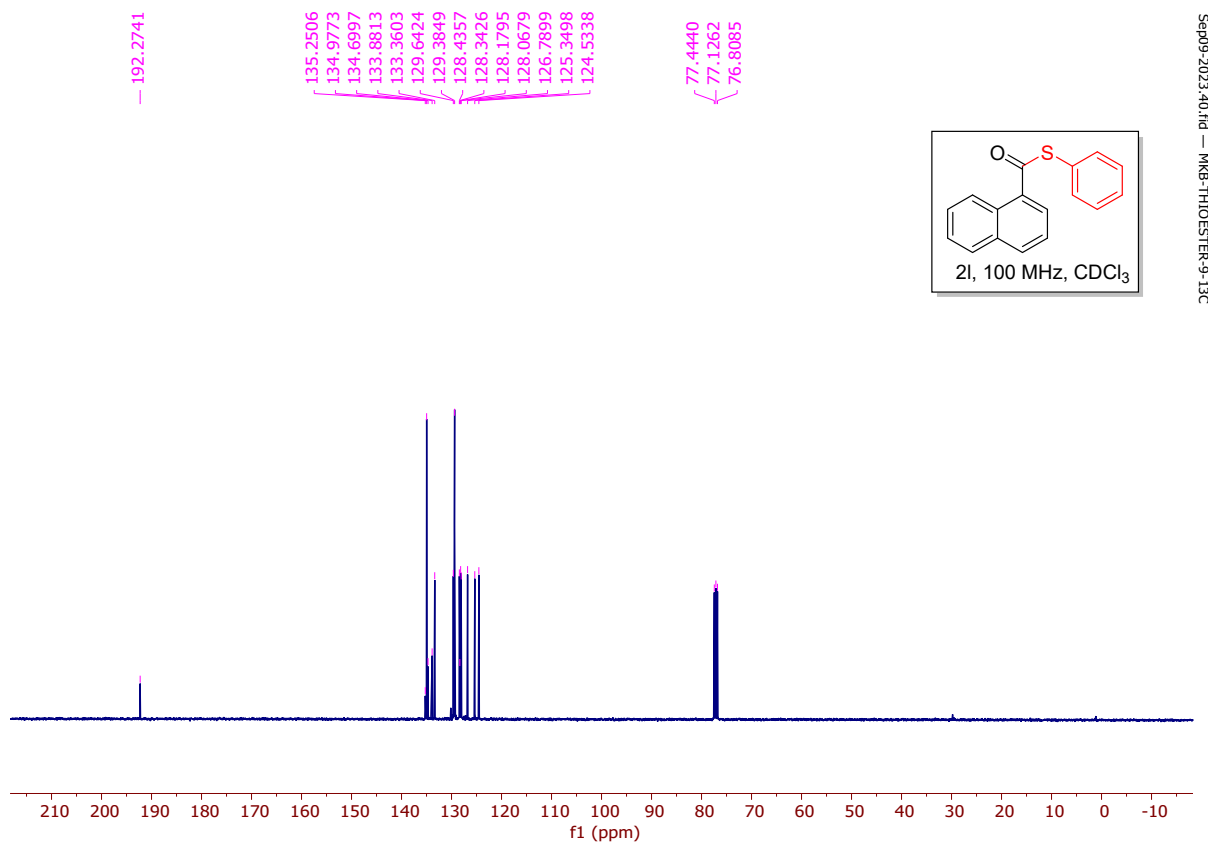

Sep09-2023-40.fid — MKB-THIOESTER-9-13C

# 2m - <sup>1</sup>H & <sup>13</sup>C NMR

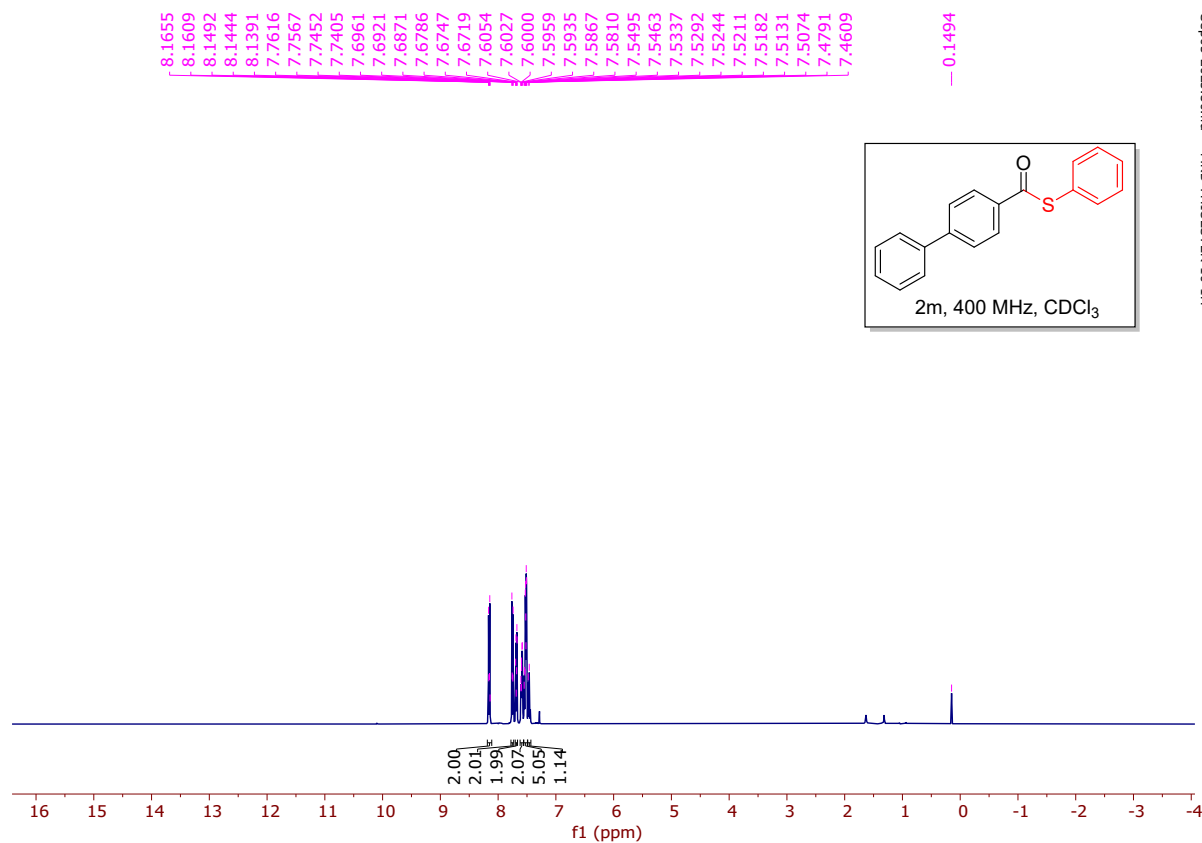

Sep05-2023\_30.fid — MKB-THIOESTER-10-1H

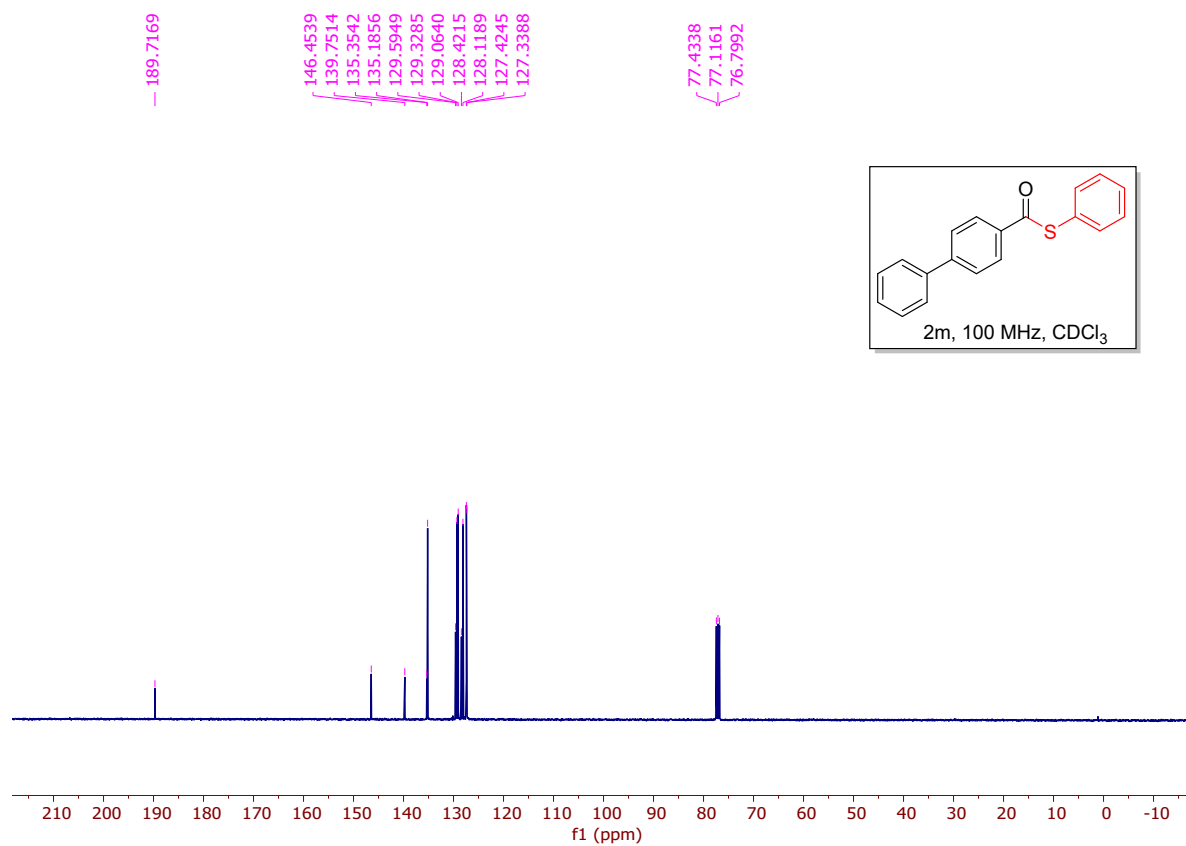

Sep09-2023\_50.fid — MKB-THIOESTER-10-13C

2n - <sup>1</sup>H & <sup>13</sup>C NMR

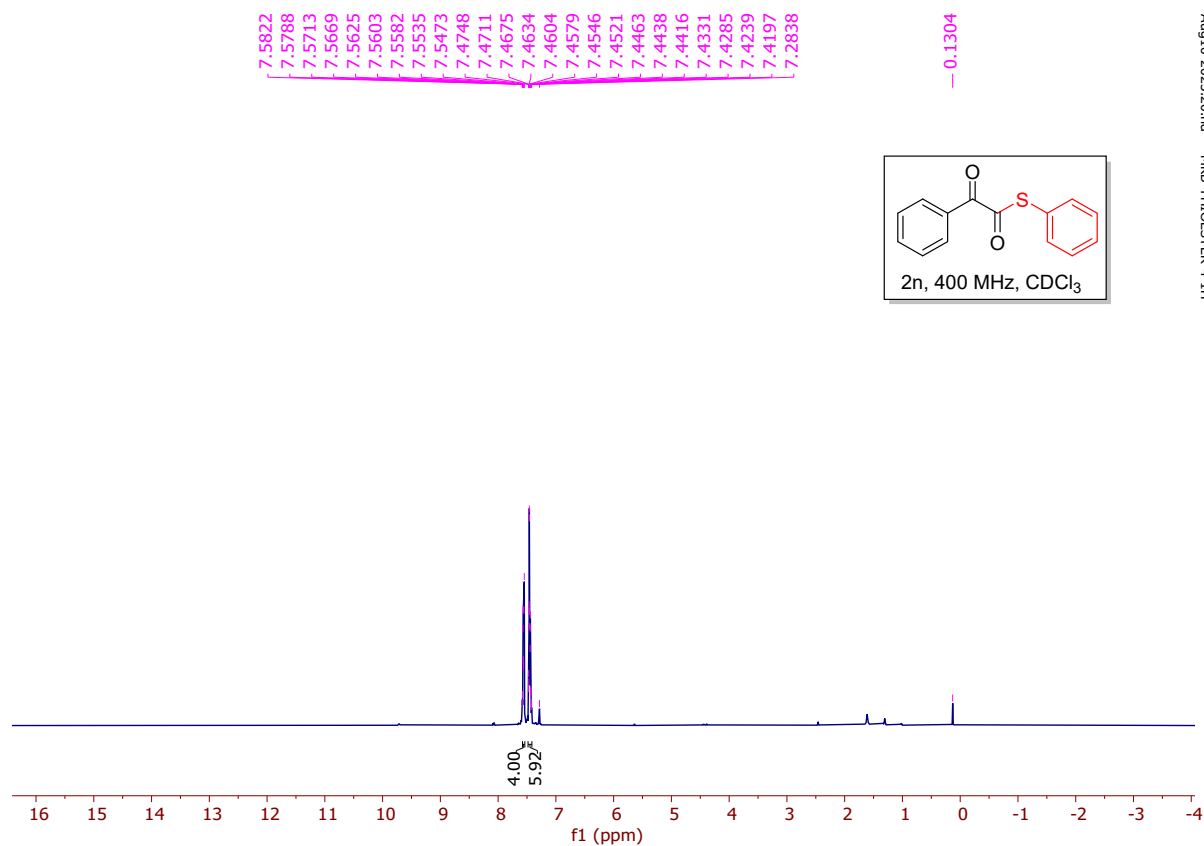

Aug10-2023.20.fid — MKB-THIOESTER-4-1H

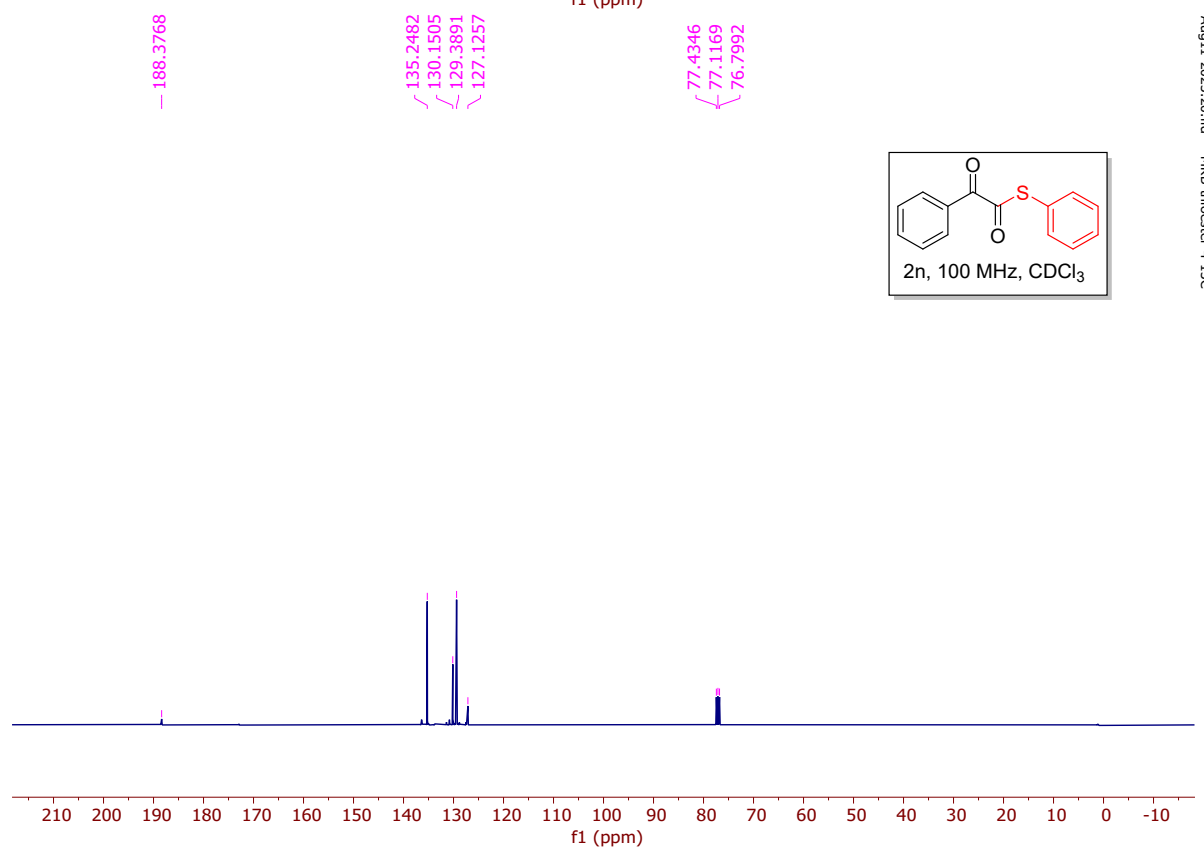

Aug11-2023.20.fid — MKB-thioester-4-13C

# 4a - $^1\text{H}$ & $^{13}\text{C}$ NMR

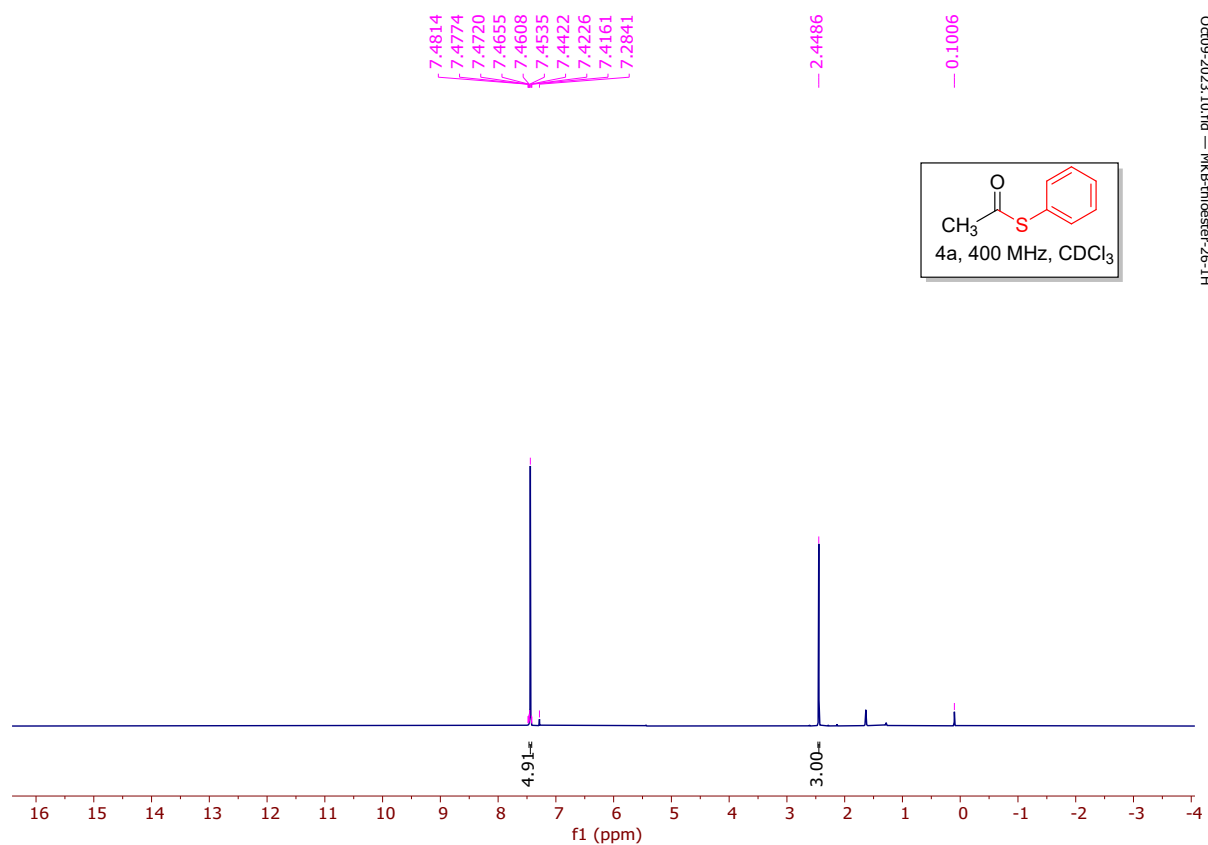

0c09-2023.10.fid — MKB-thioester-26-1H

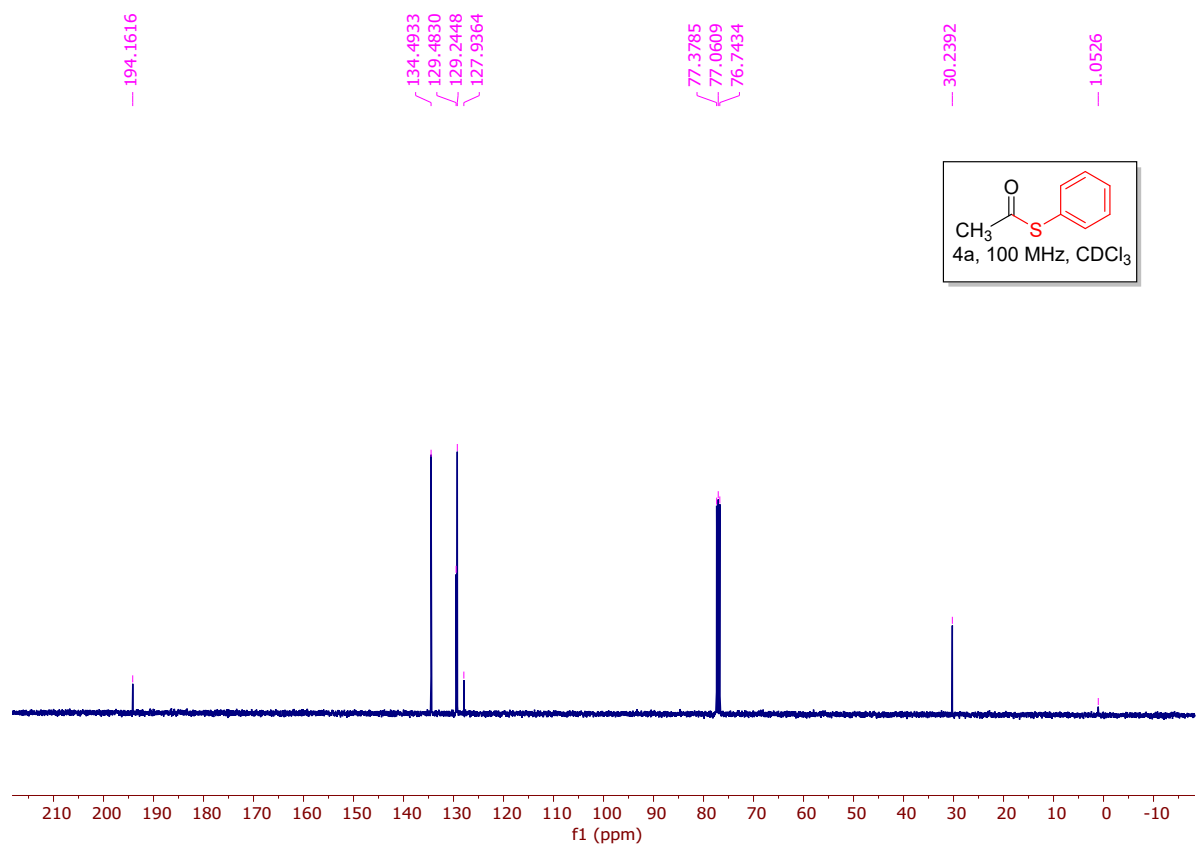

0c12-2023.30.fid — MKB-thioester-26-13C

4b - <sup>1</sup>H & <sup>13</sup>C NMR

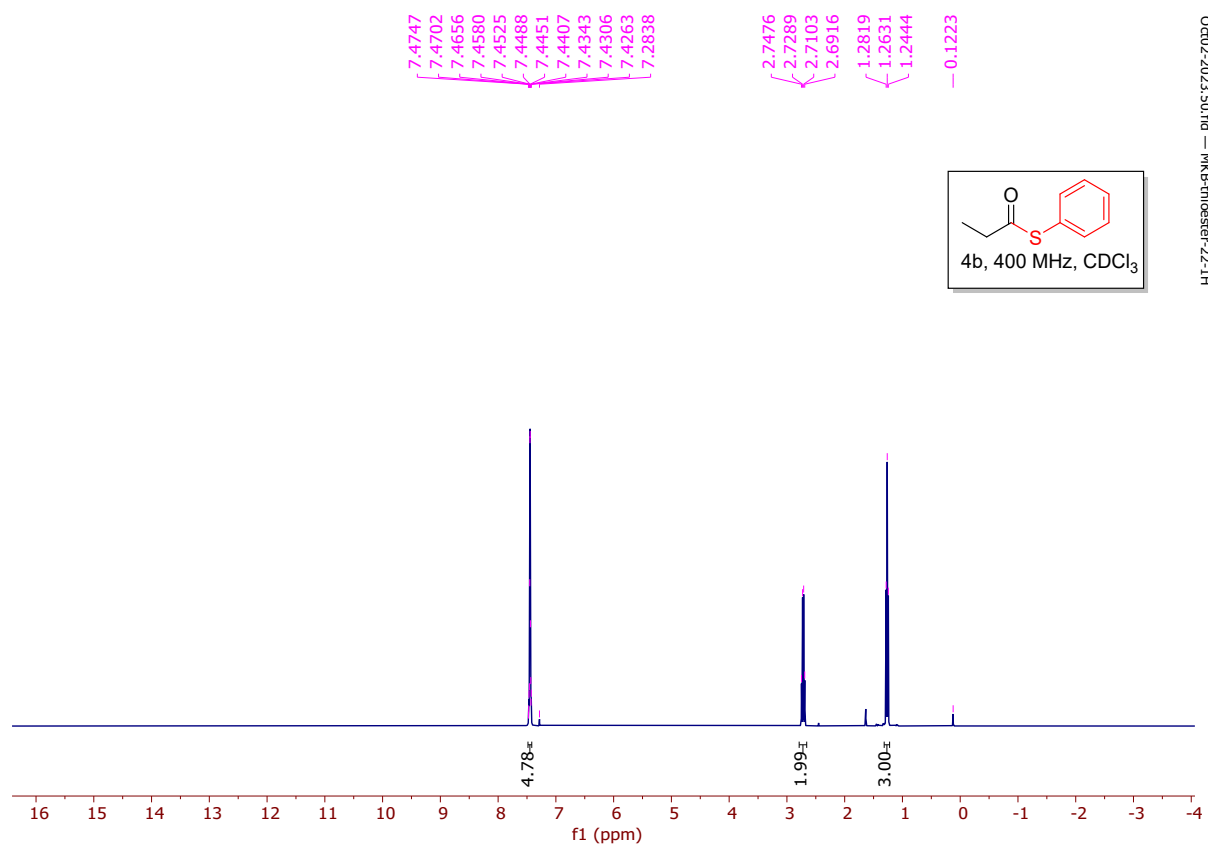

0604-2023.50.fid — MKB-THIOESTER-22-1H

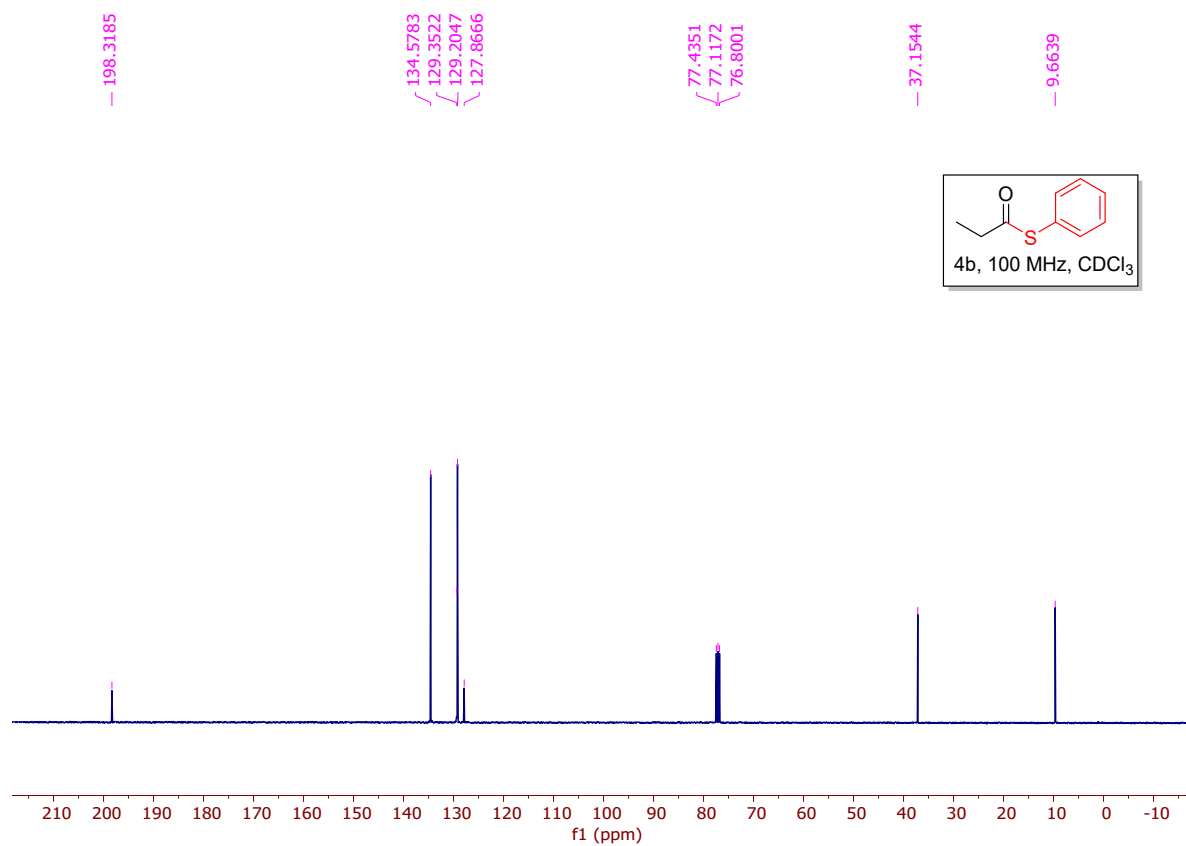

0604-2023.100.fid — MKB-THIOESTER-22-13C

4c - <sup>1</sup>H & <sup>13</sup>C NMR

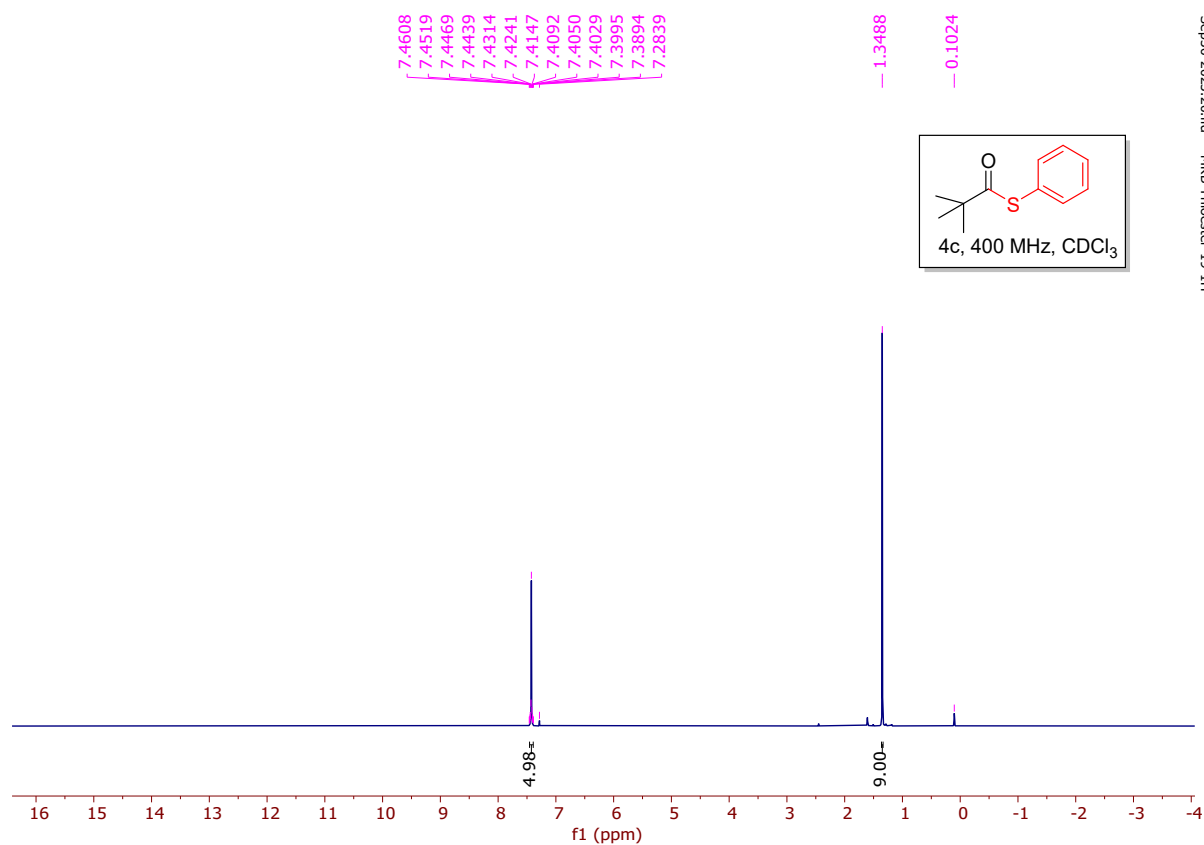

Sept30-2023\_20.fid — MKB-thioester-19-1H

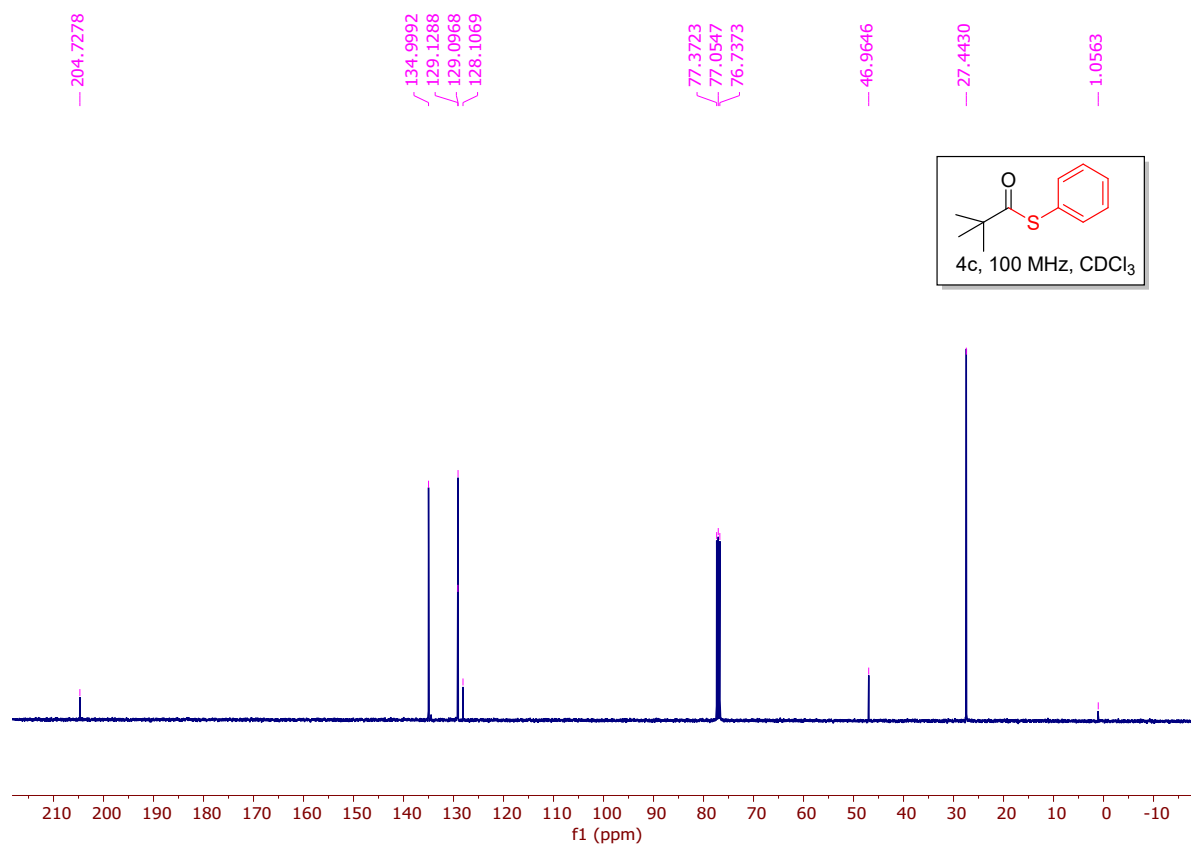

Oct02-2023\_20.fid — MKB-thioester-19-13C

# 4d - <sup>1</sup>H & <sup>13</sup>C NMR

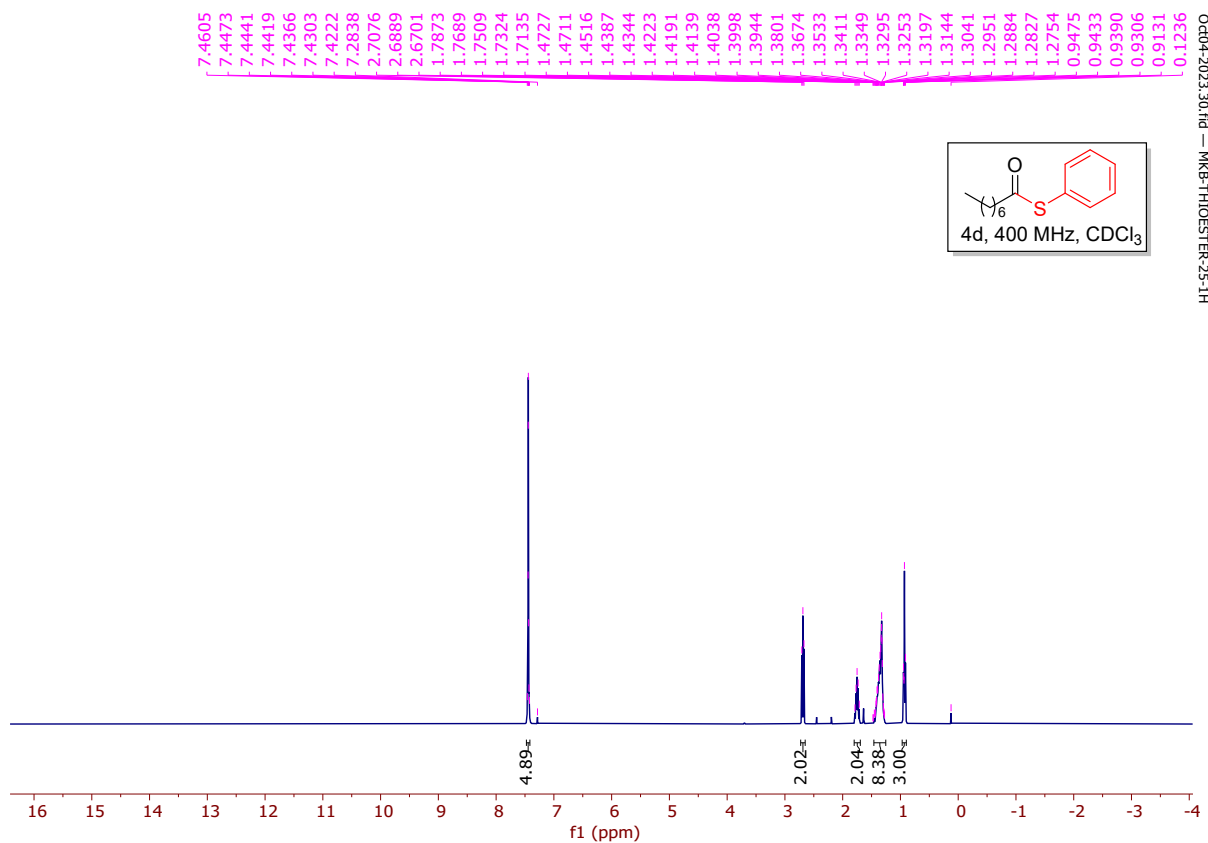

OC130-2023.30.fid — MKB-THIOESTER-25-1H

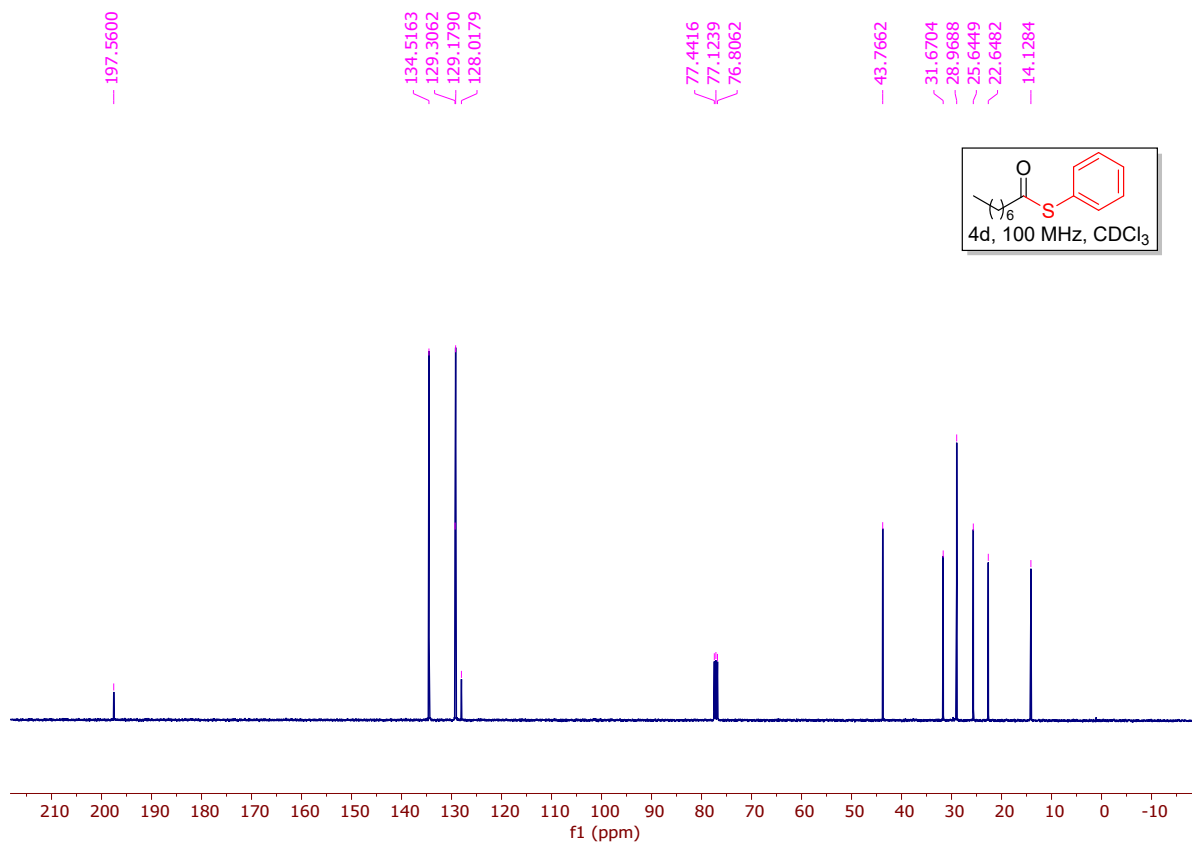

OC130-2023.30.fid — MKB-THIOESTER-25-13C



4e - <sup>1</sup>H & <sup>13</sup>C NMR

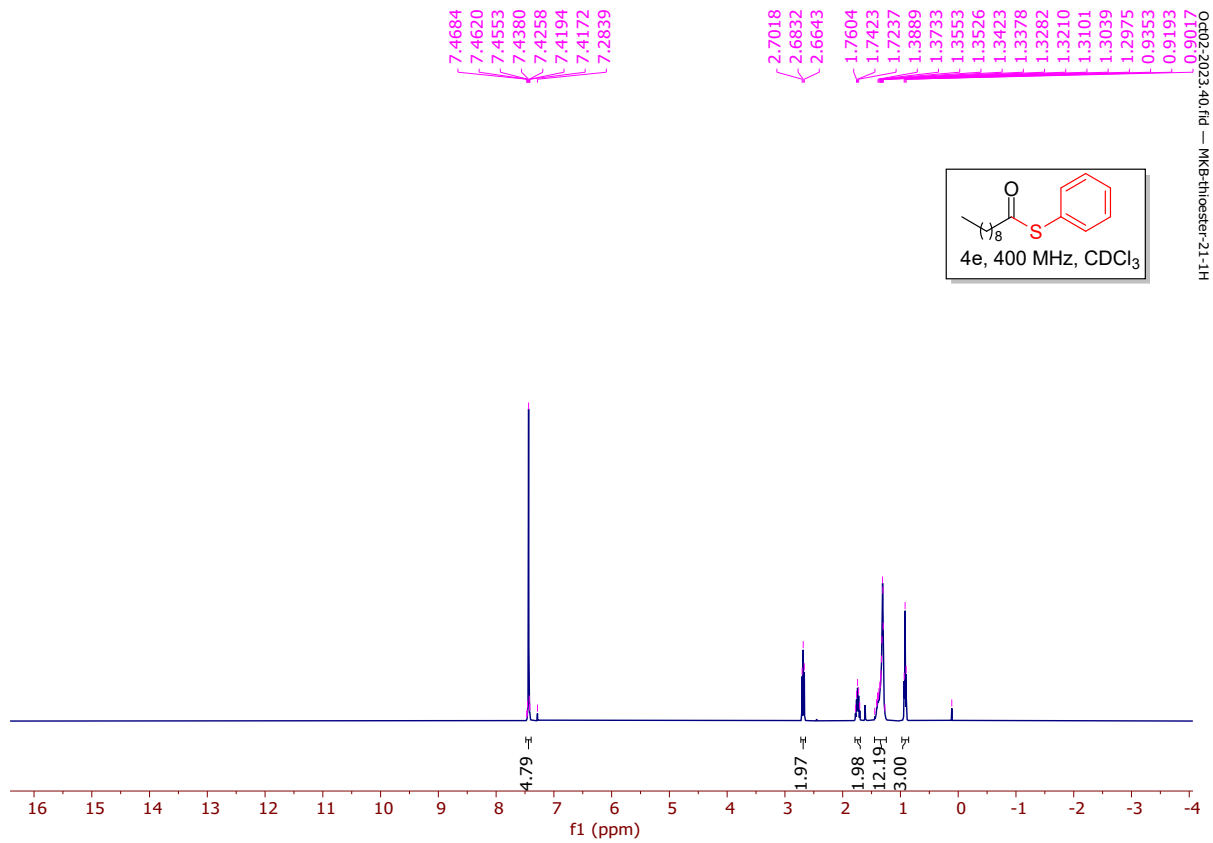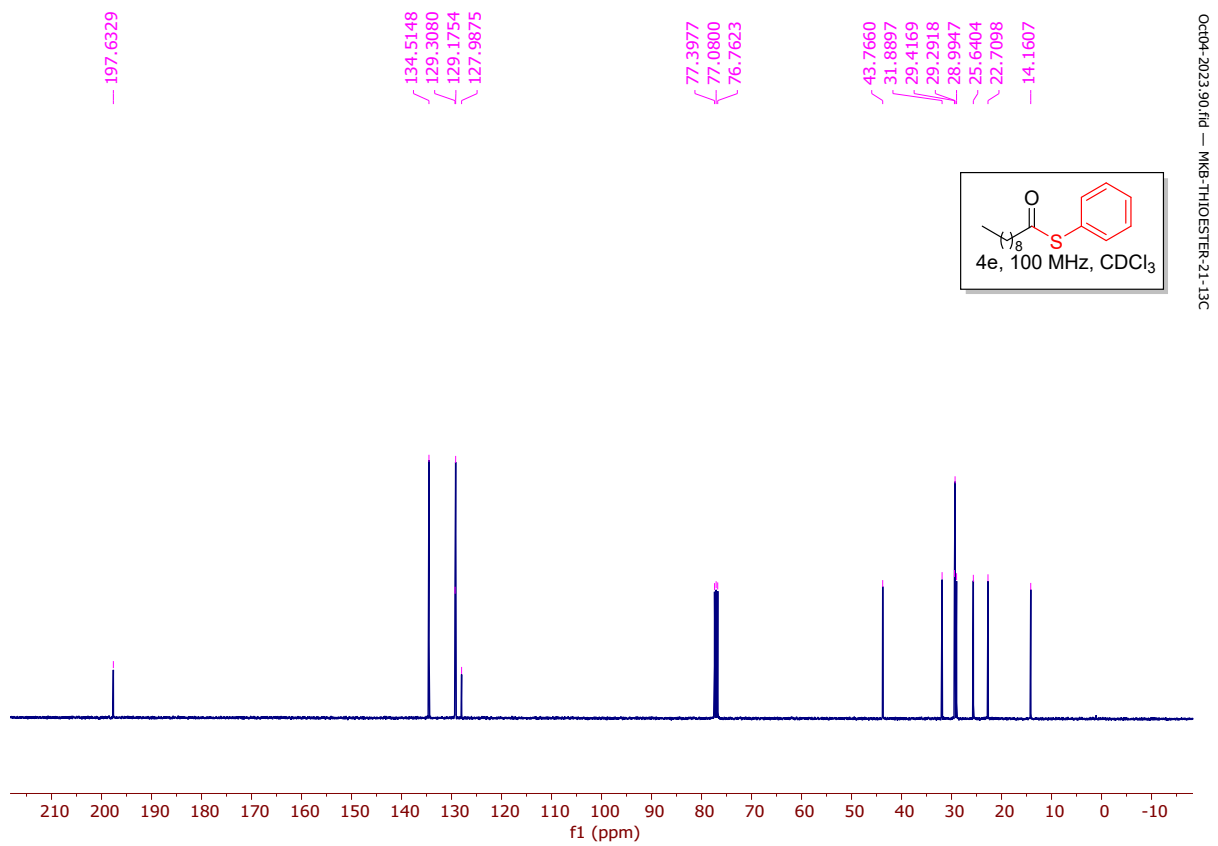

4f - <sup>1</sup>H & <sup>13</sup>C NMR

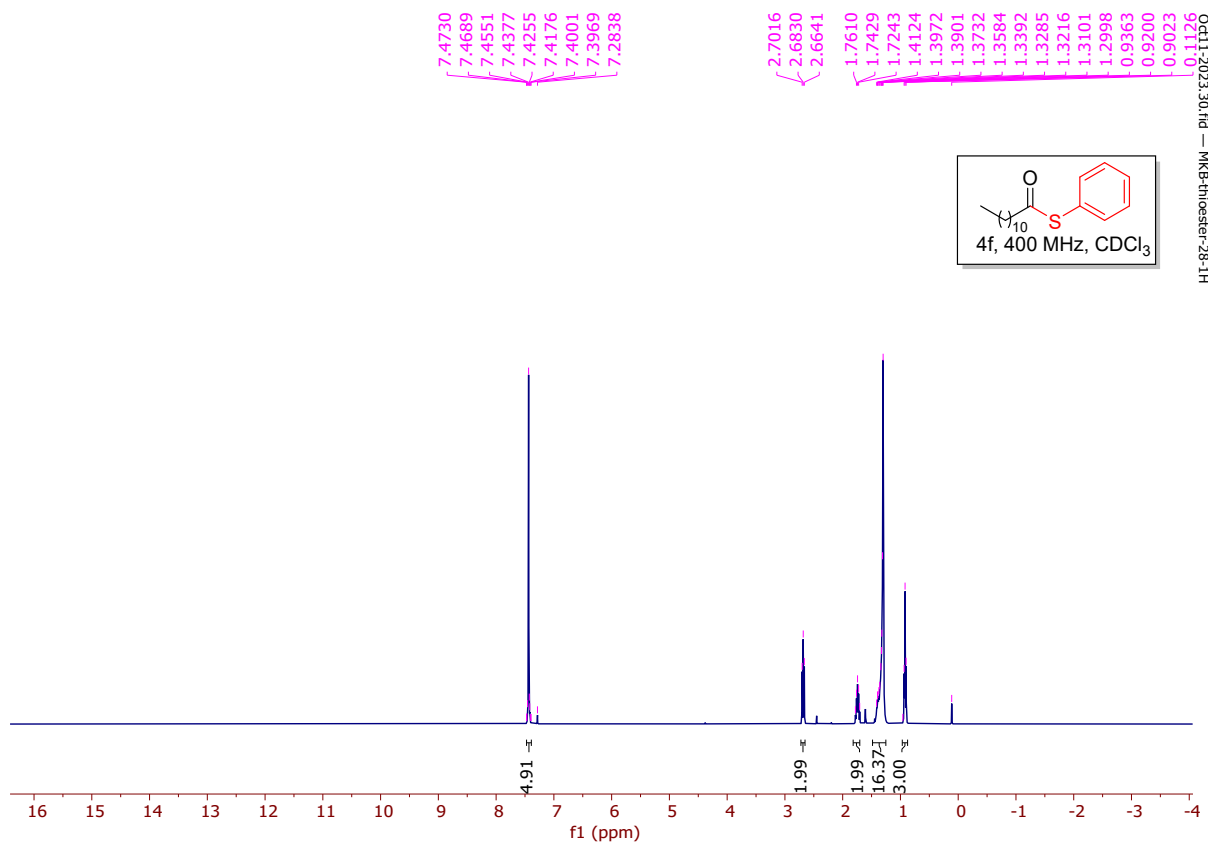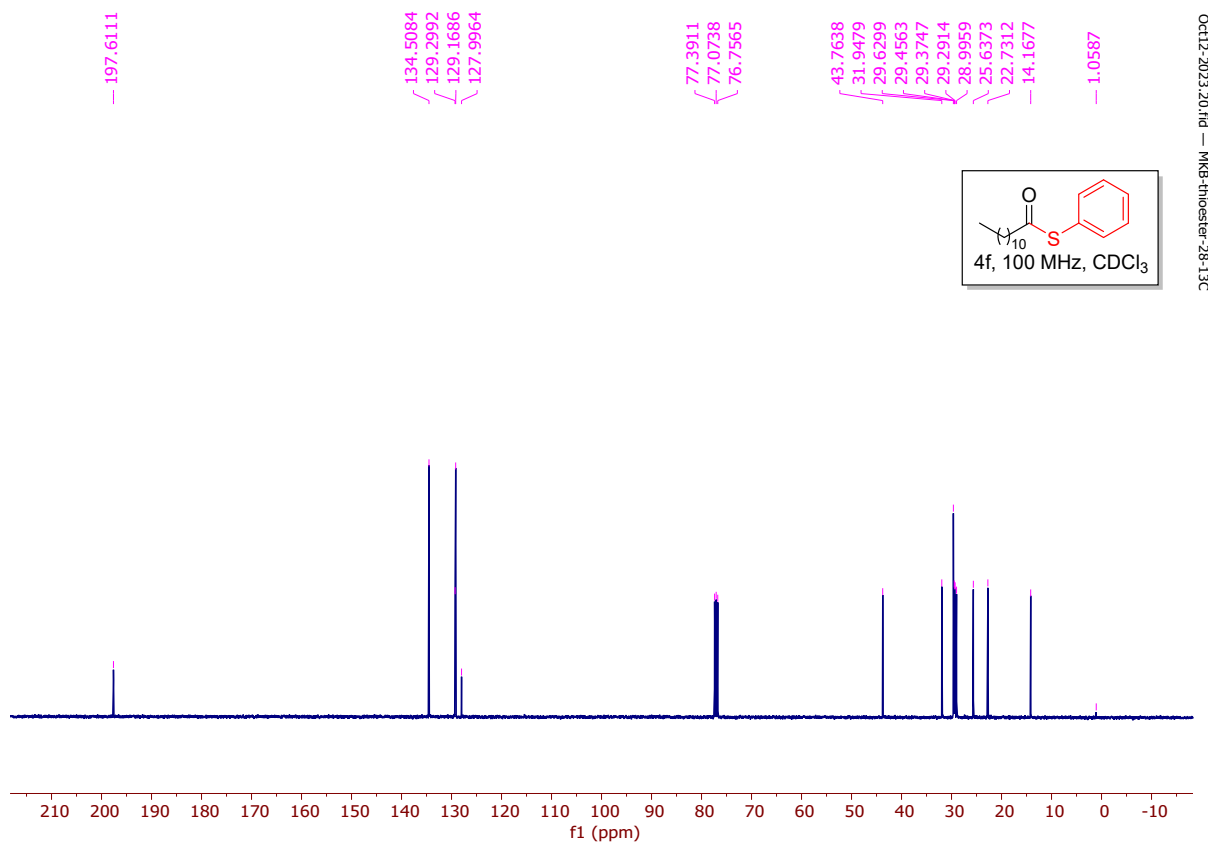

4g -  $^1\text{H}$  &  $^{13}\text{C}$  NMR

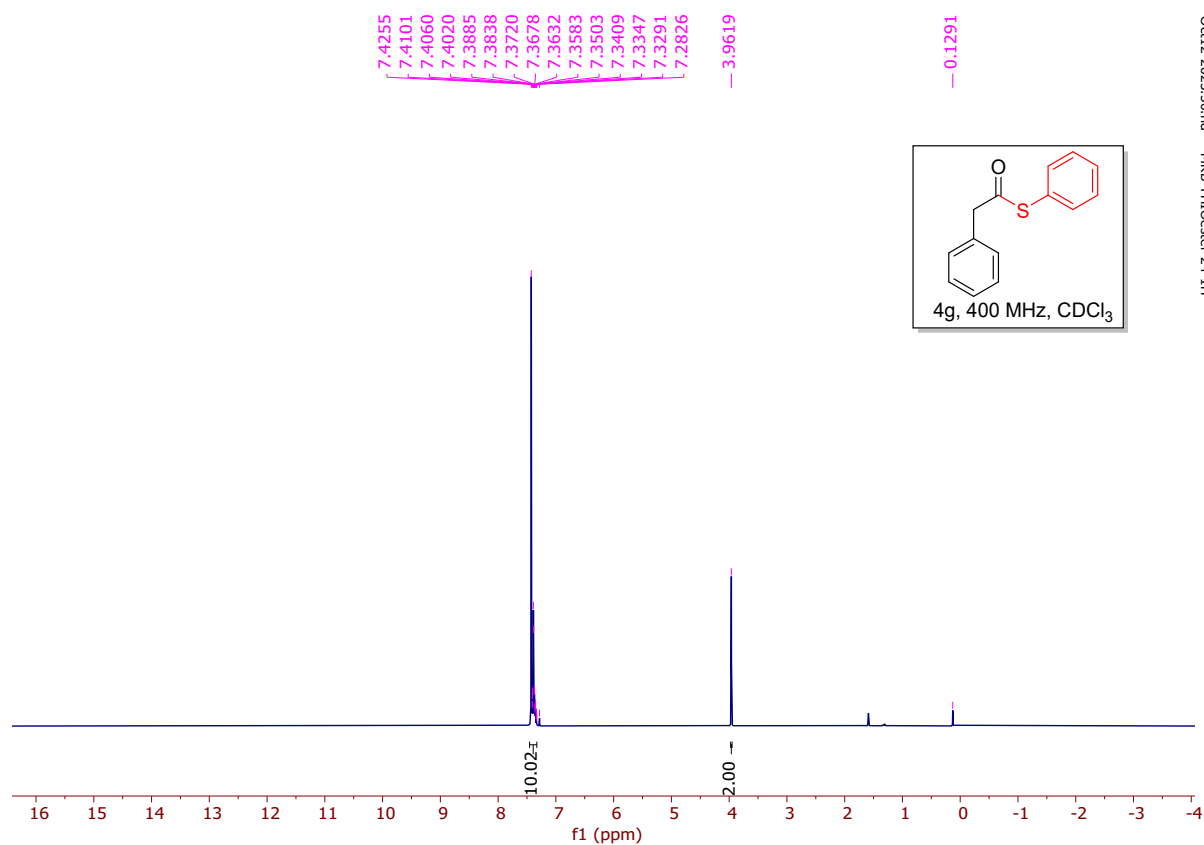

0612-2023.50.fid — MK8-THIOESTER-24-1H

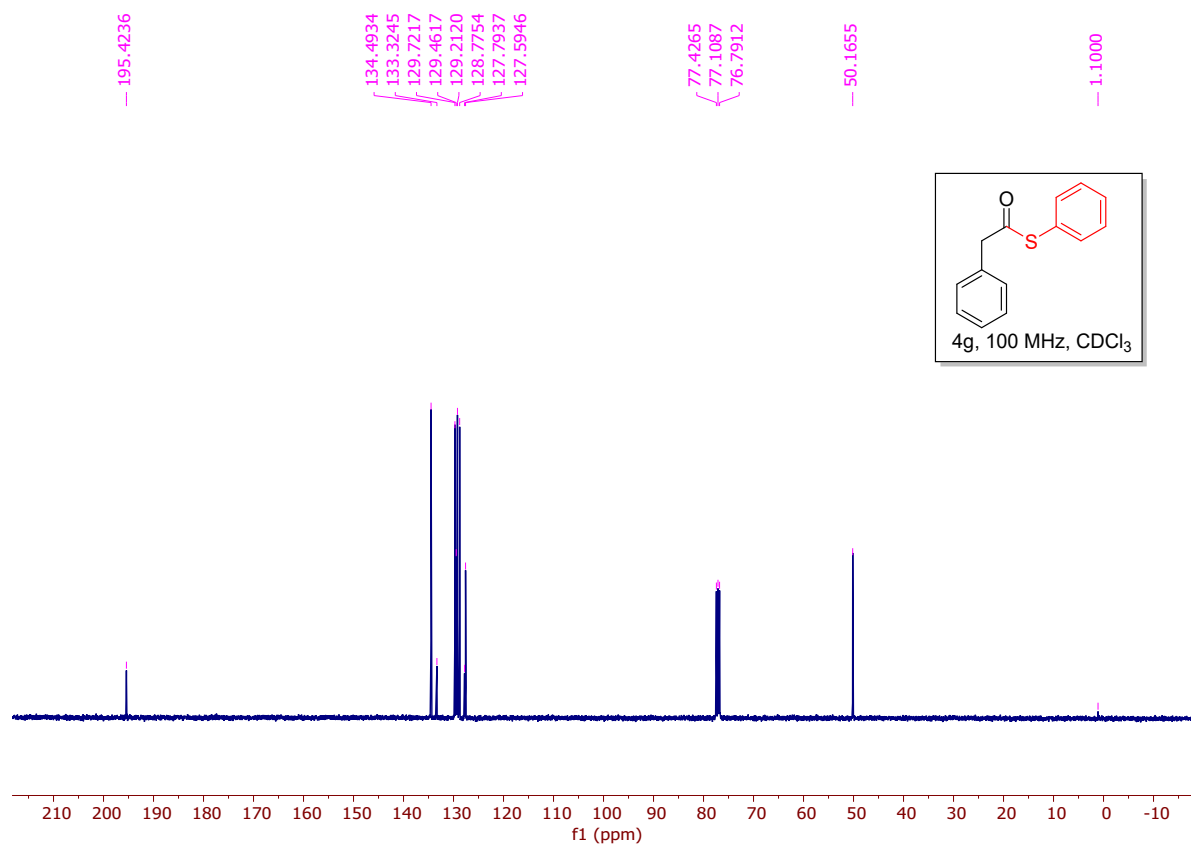

06130-2023.20.fid — MK8-THIOESTER-24-13C

4h - <sup>1</sup>H & <sup>13</sup>C NMR

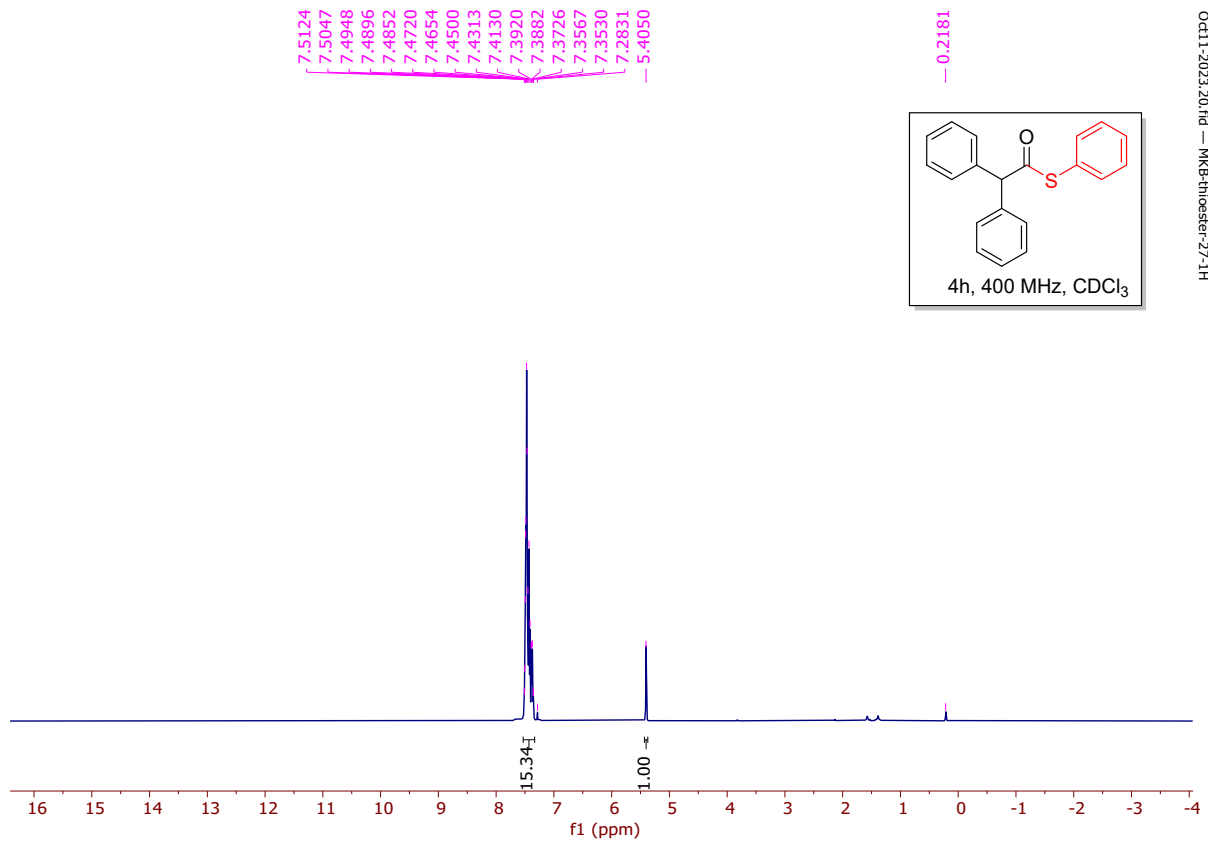

Oct11-2023.20.fid — MKB-thioester-27-1H

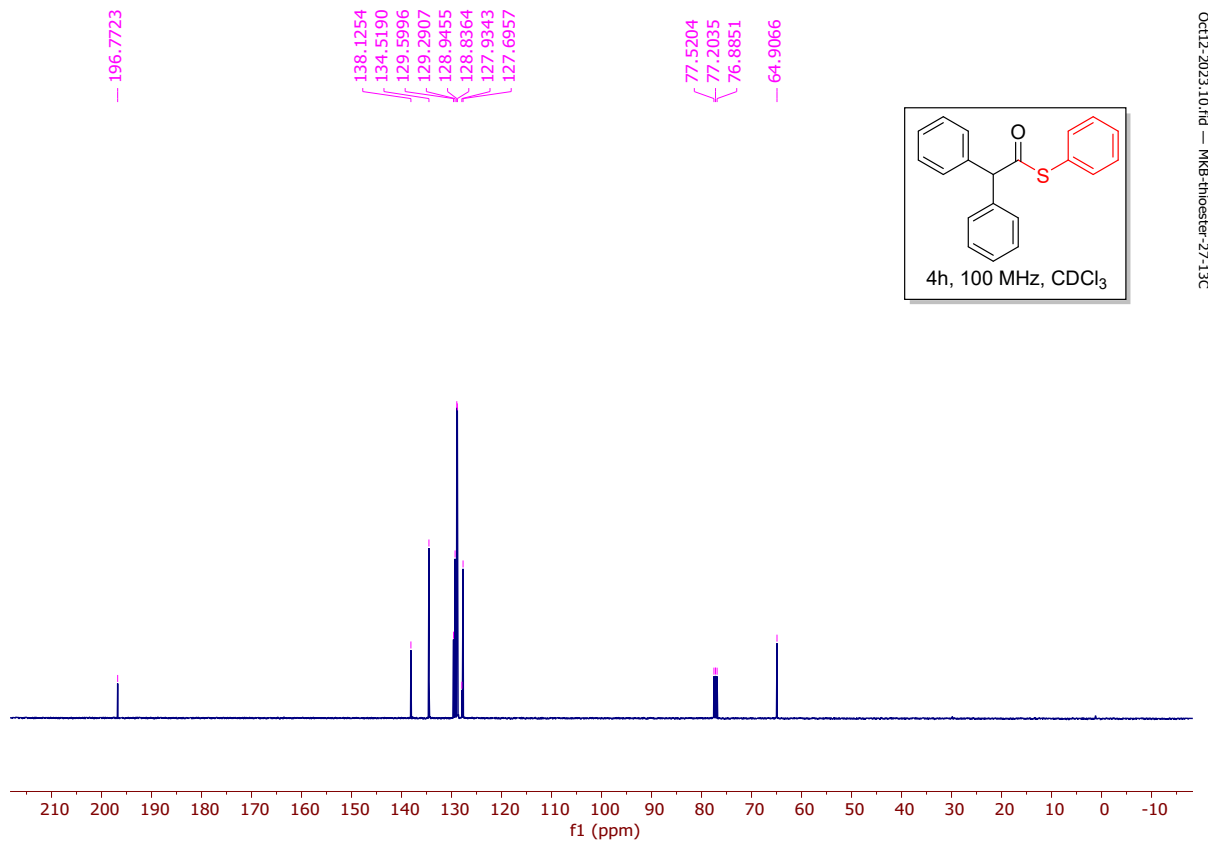

Oct12-2023.10.fid — MKB-thioester-27-13C

6a - <sup>1</sup>H & <sup>13</sup>C NMR

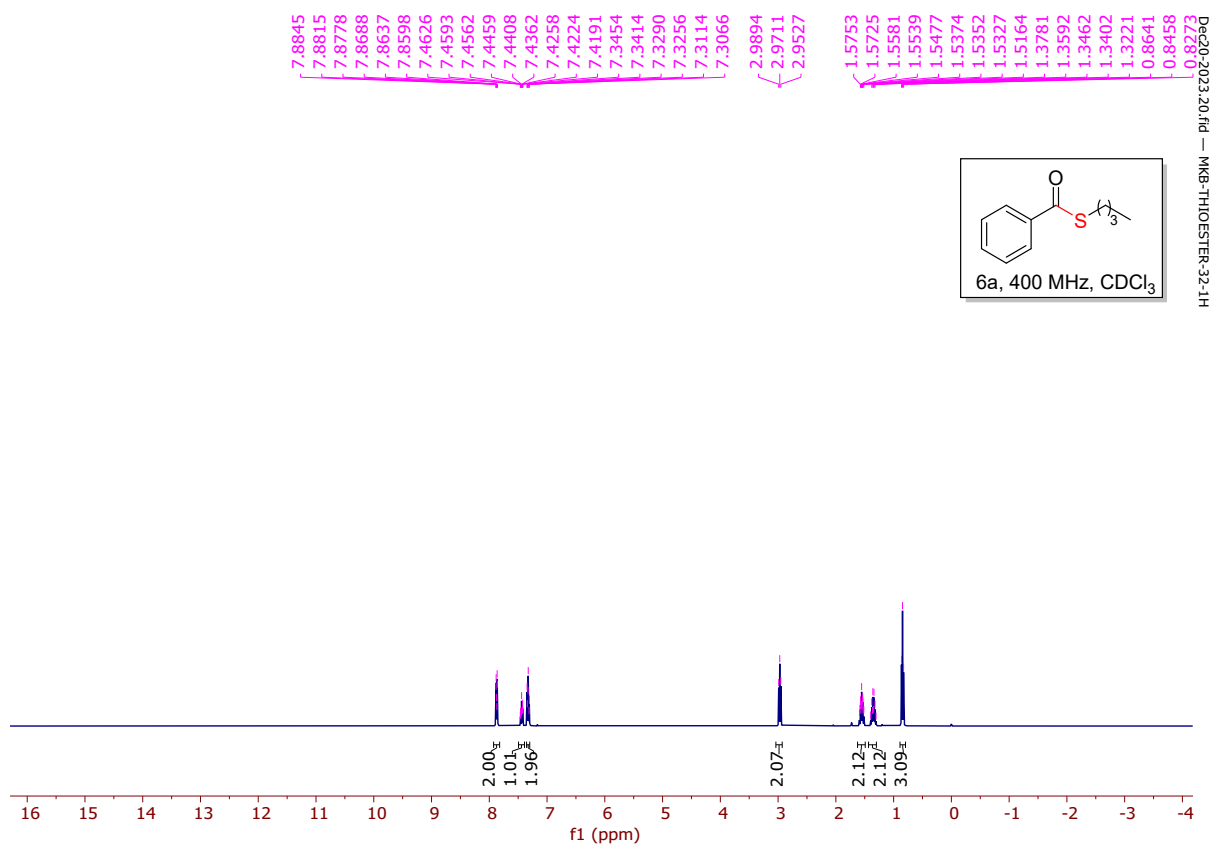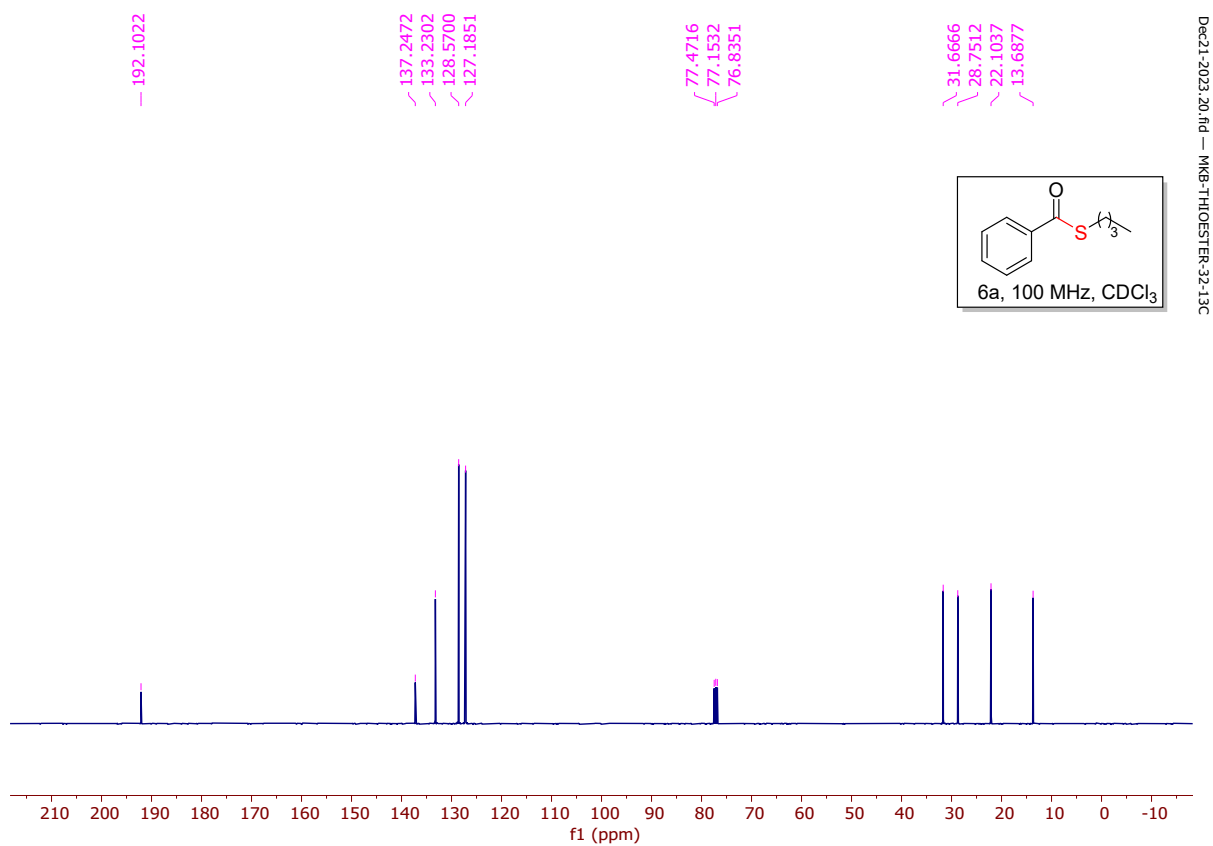

**6b** -  $^1\text{H}$  &  $^{13}\text{C}$  NMR

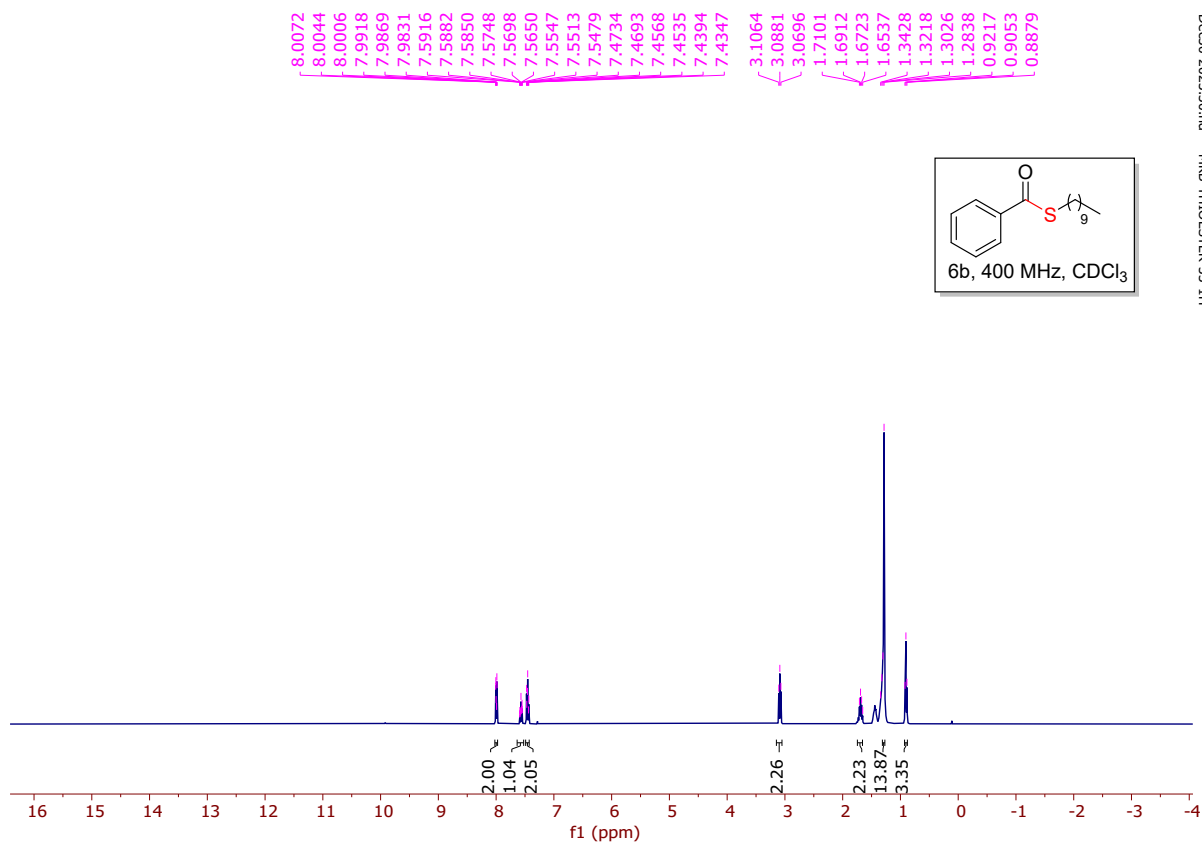

DeC30-2023-30.fid — MK8-THIOESTER-33-1H

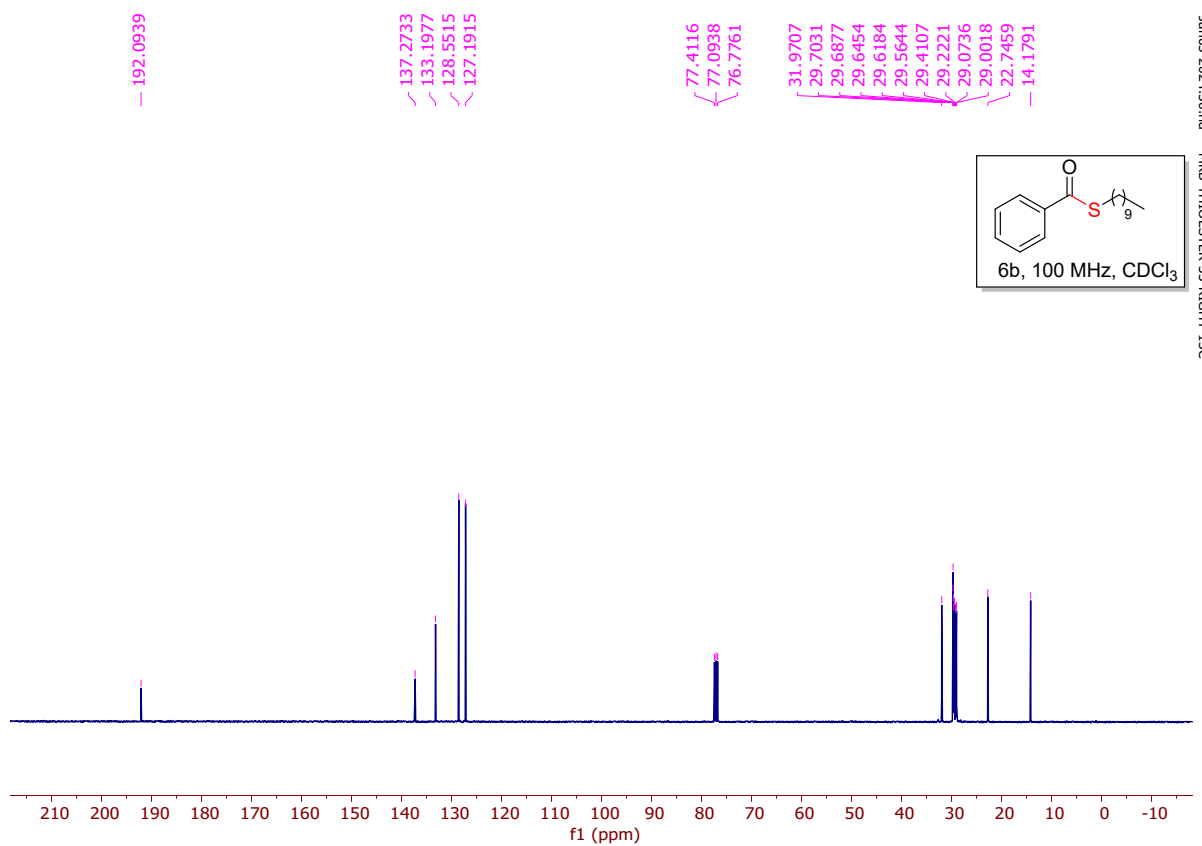

Jan03-2024-30.fid — MK8-THIOESTER-33-RIGHT-13C

# 6c - <sup>1</sup>H & <sup>13</sup>C NMR

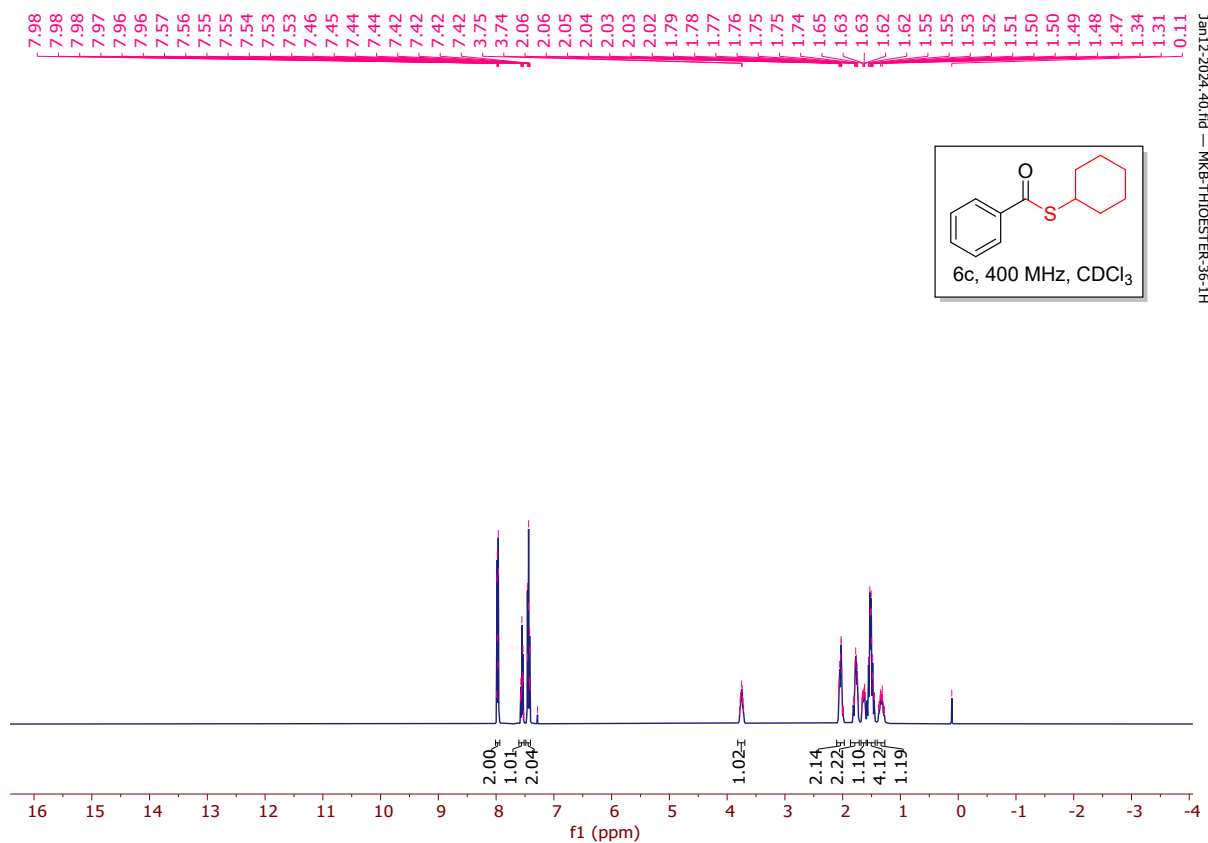

Jan12-2024\_40.fid — MKB-THIOESTER-36-1H

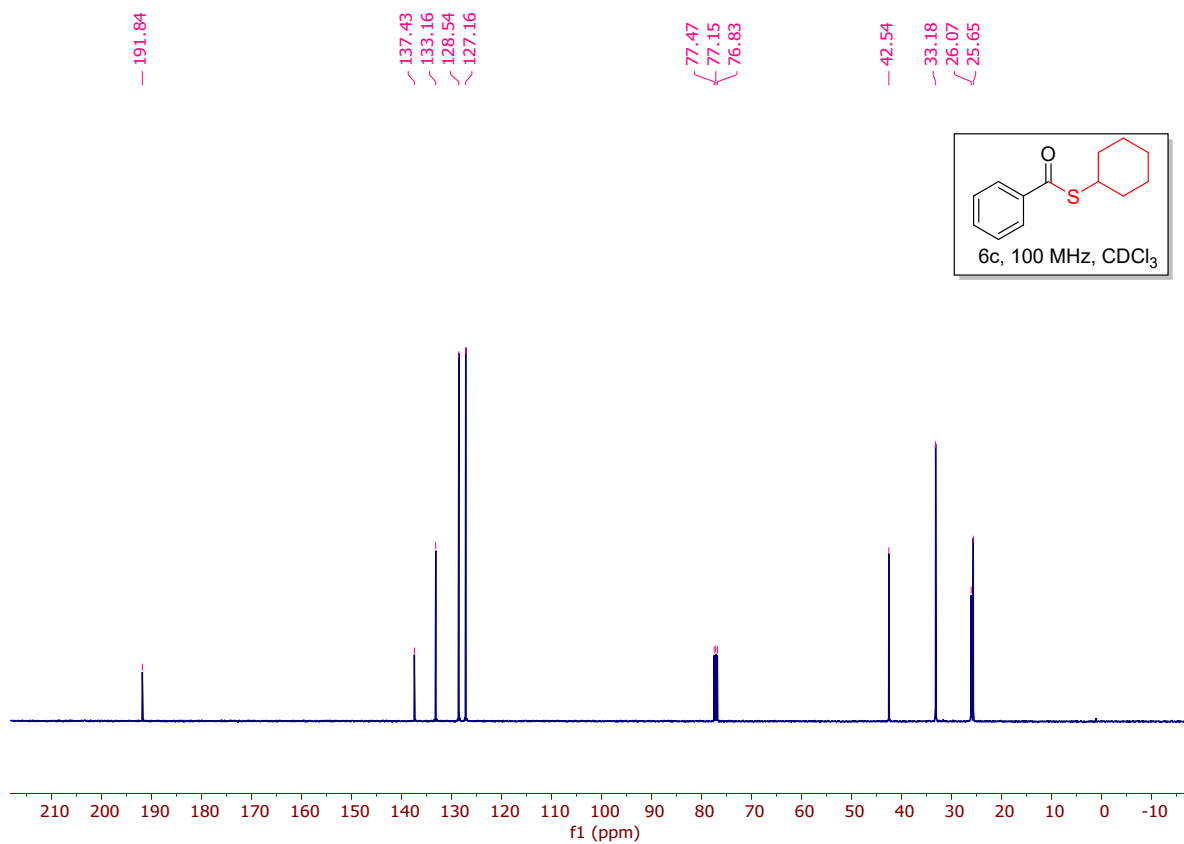

Jan16-2024\_20.fid — MKB-THIOESTER-36-13C

6d - <sup>1</sup>H & <sup>13</sup>C NMR

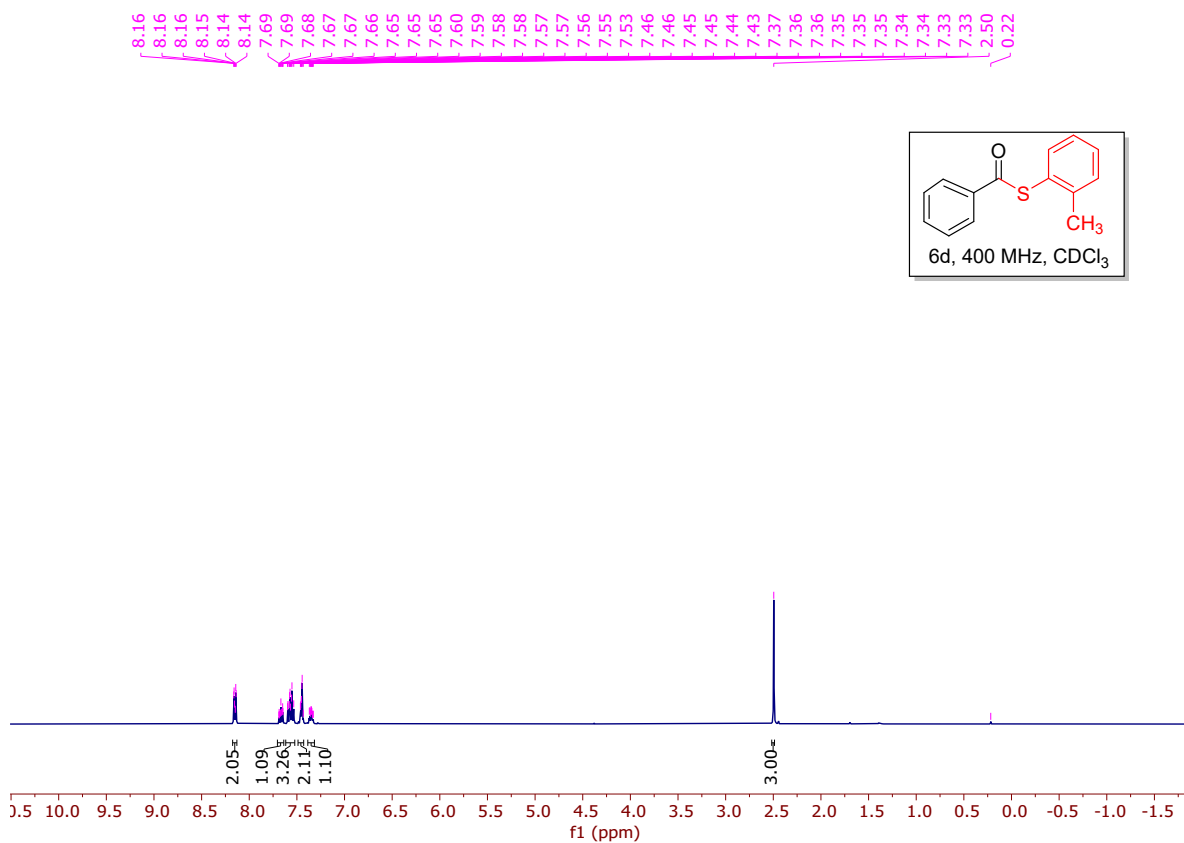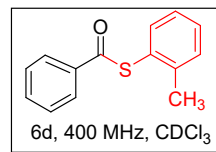

Jan03-2024\_60.fid — MKB-THIOESTER-35-1H

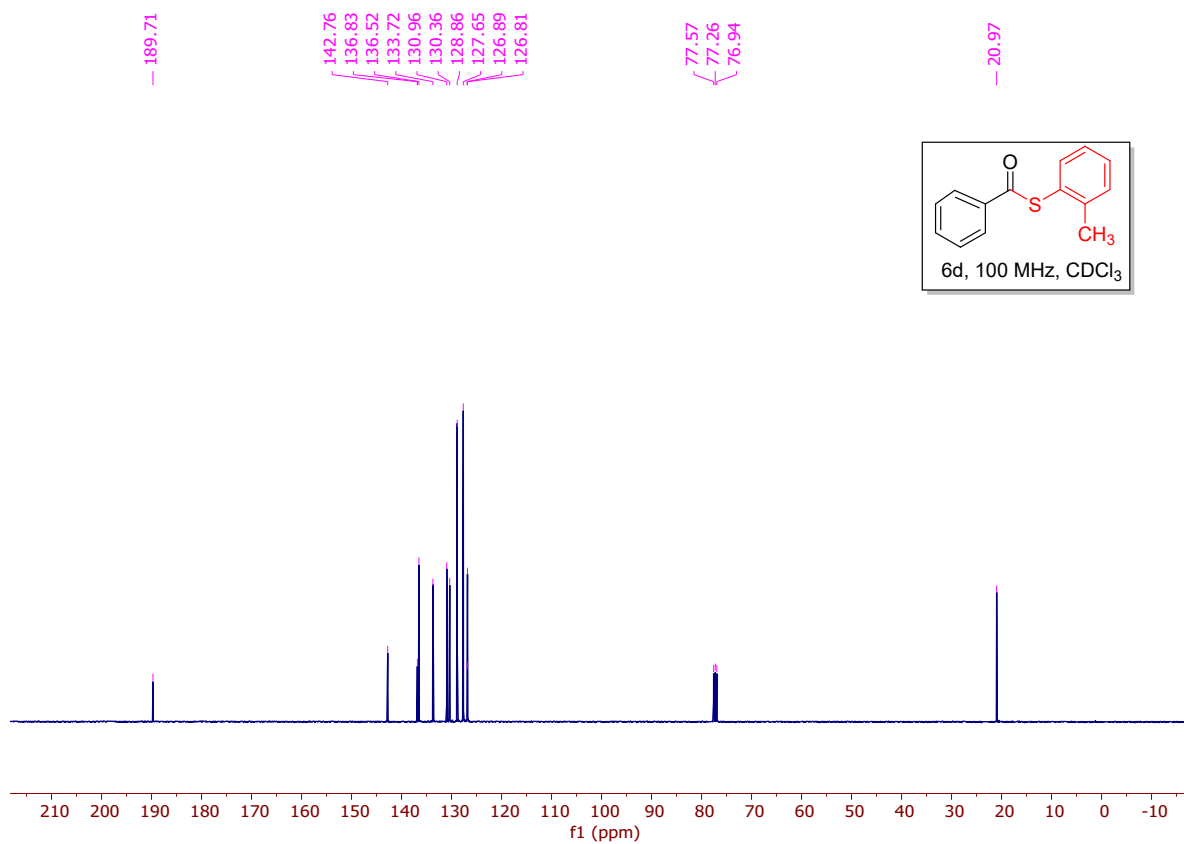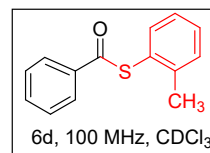

Jan04-2024\_30.fid — MKB-THIOESTER-35-13C



6e - <sup>1</sup>H & <sup>13</sup>C NMR

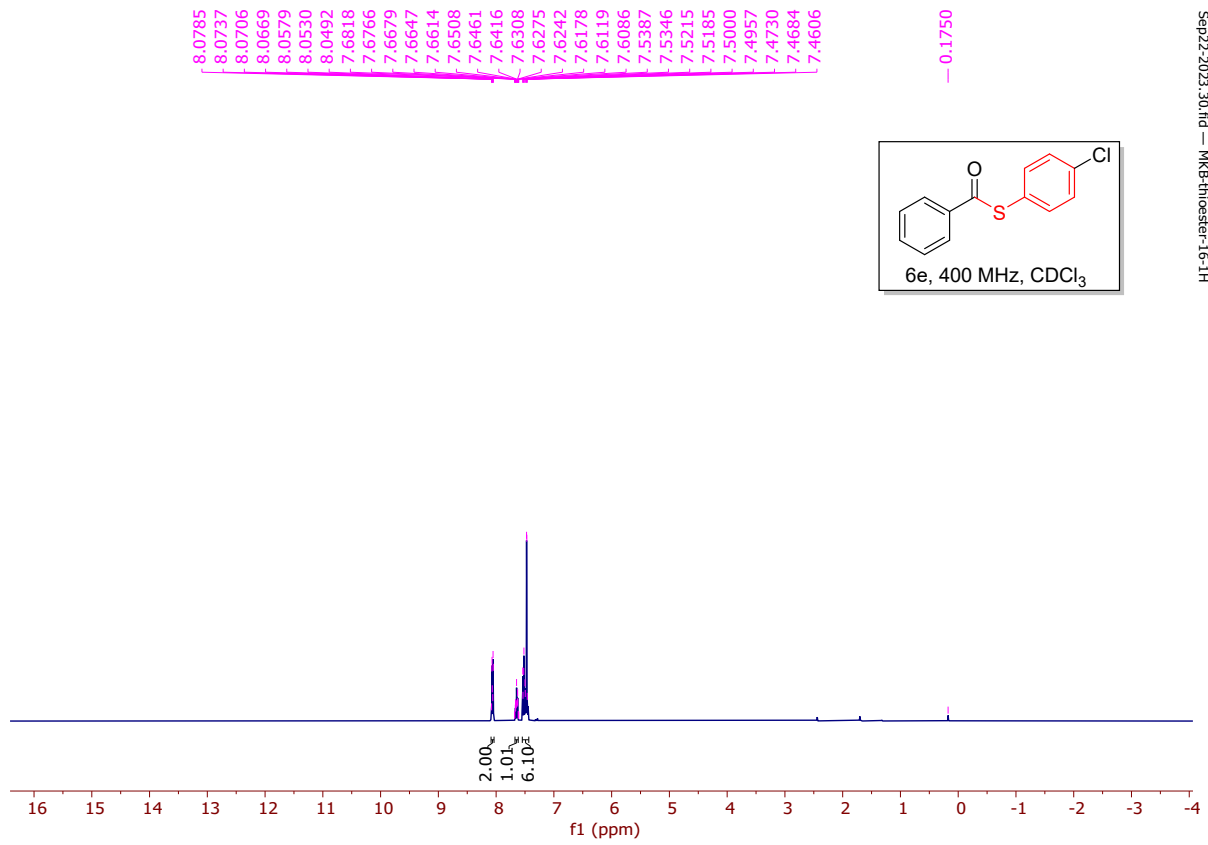

Sep22-2023\_30.fid — MKB-thioester-16-1H

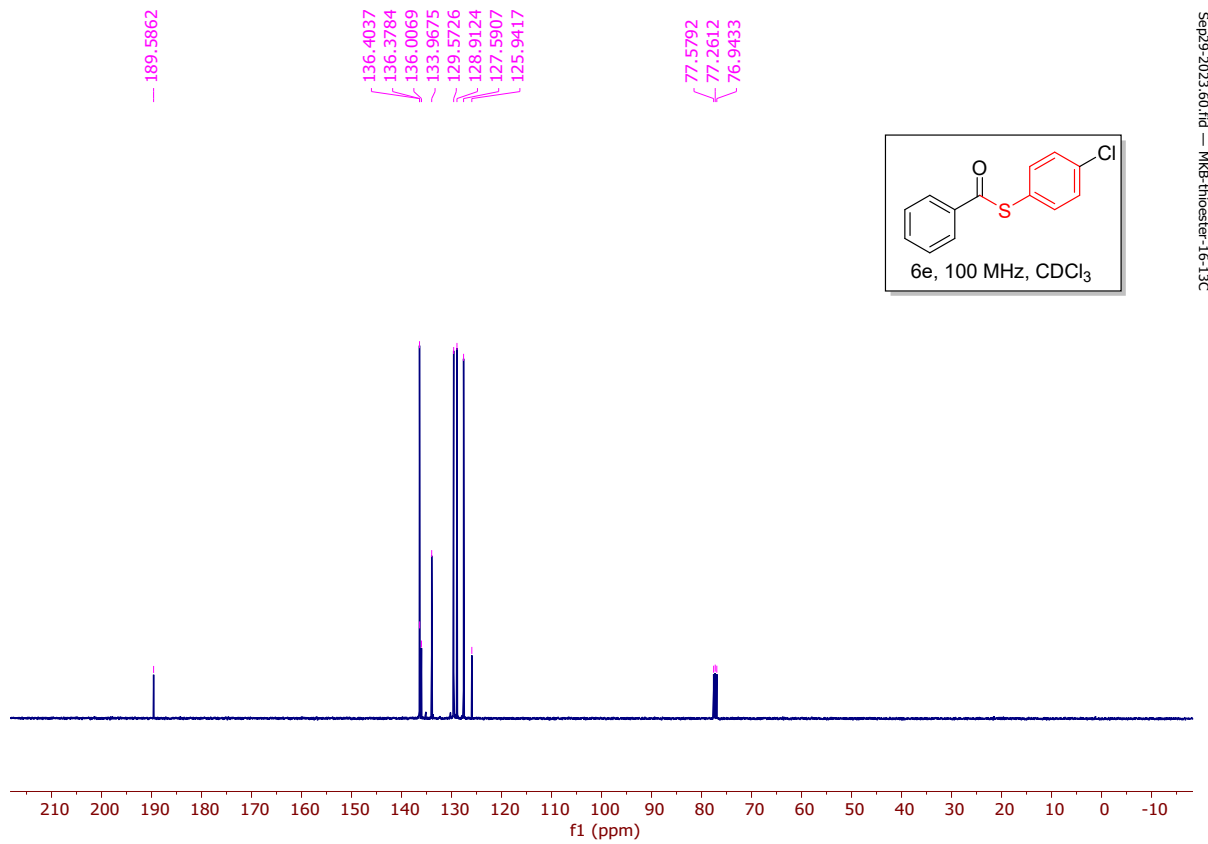

Sep29-2023\_60.fid — MKB-thioester-16-13C

6f - <sup>1</sup>H & <sup>13</sup>C NMR

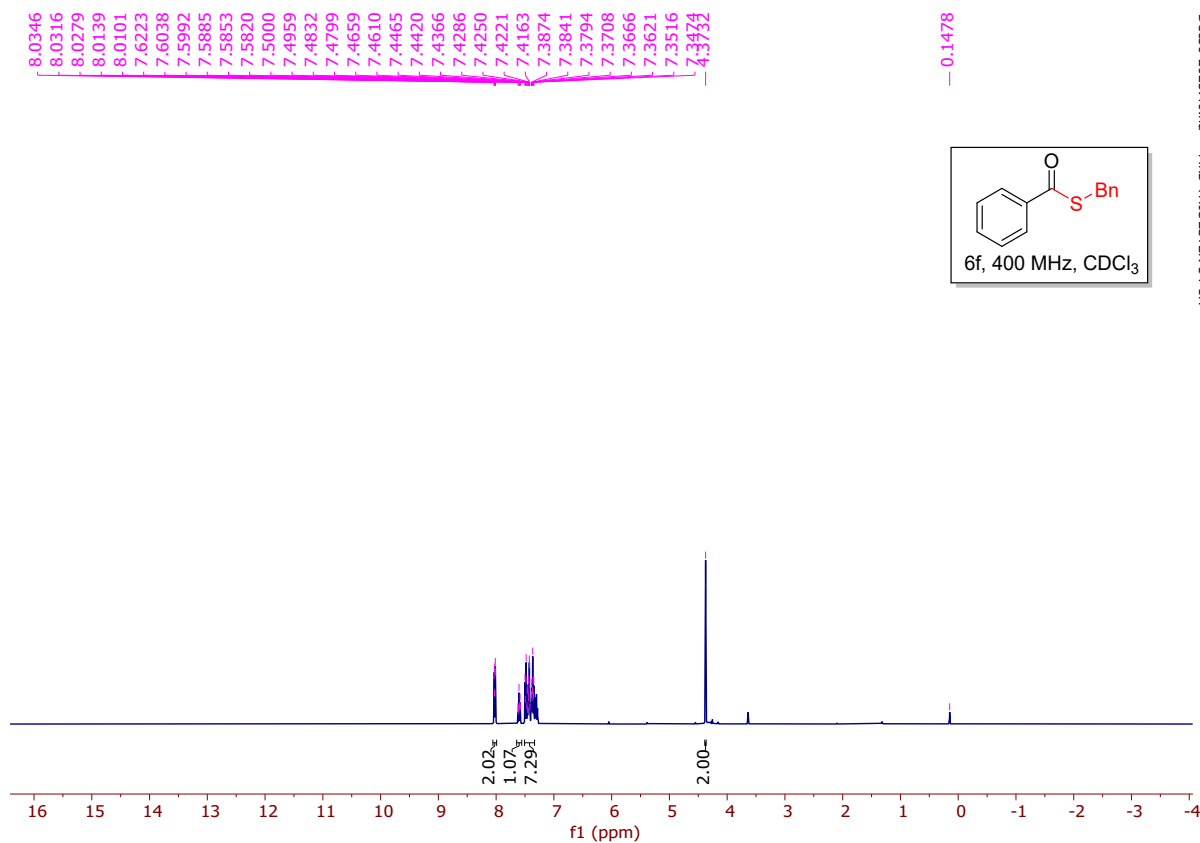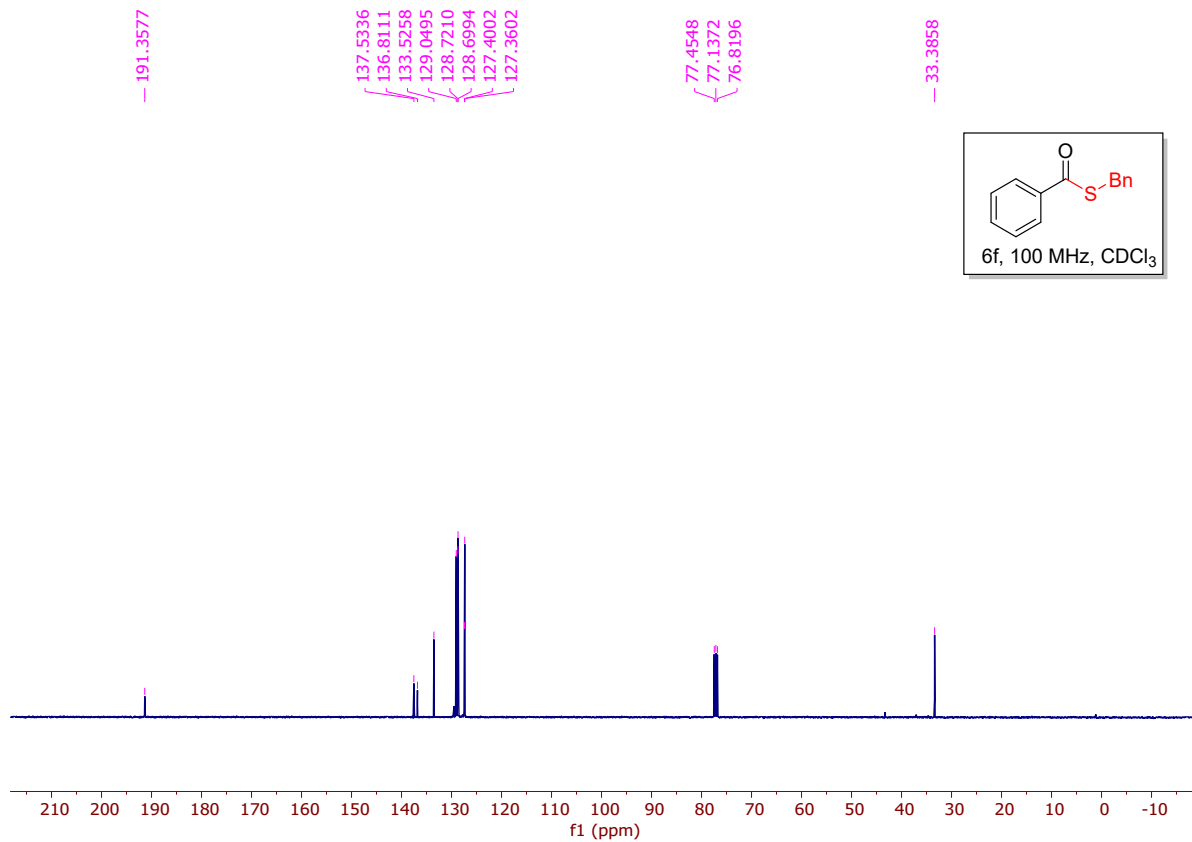

Dec30-2023:40.fid — MK8-THIOESTER-34-1H

Jan03-2024:20.fid — MK8-THIOESTER-33-13C

6g -  $^1\text{H}$  &  $^{13}\text{C}$  NMR

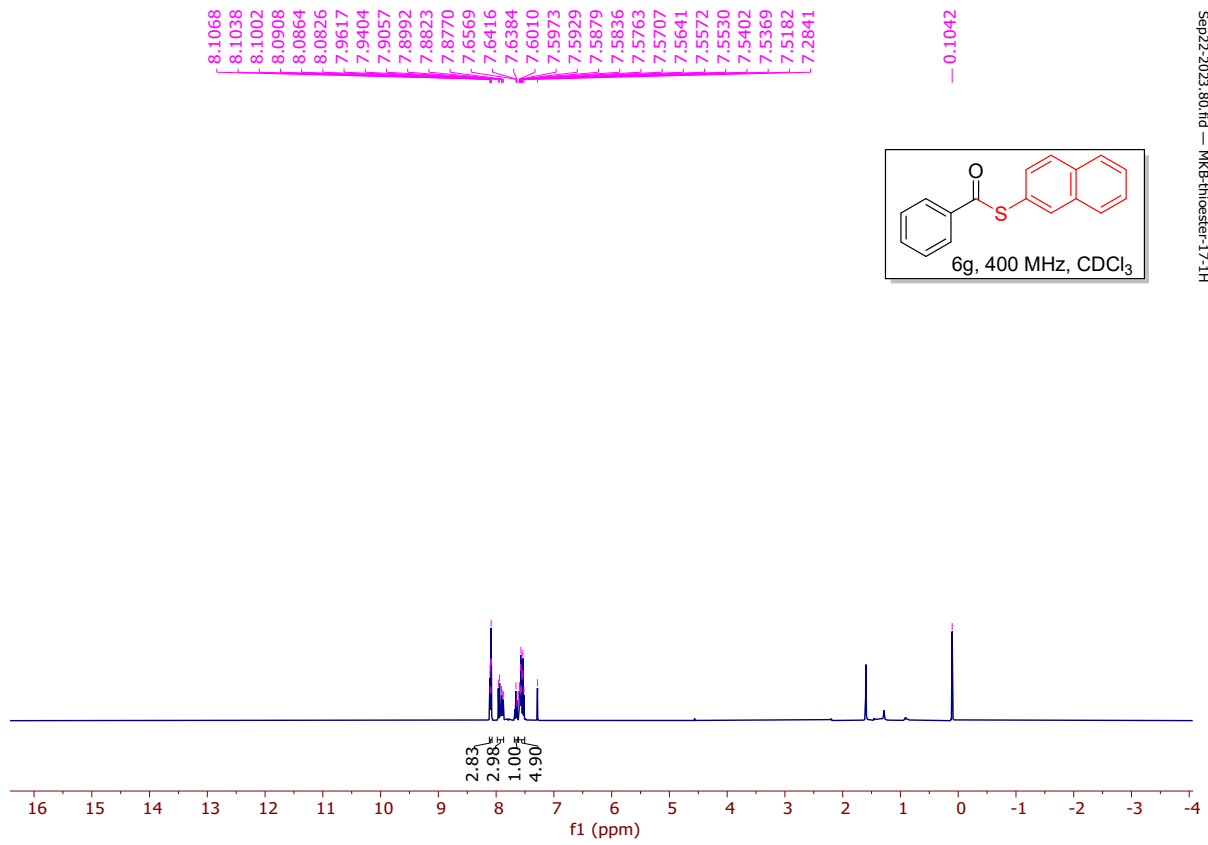

Sep22-2023.80.fid — MKB-thioester-17-1H

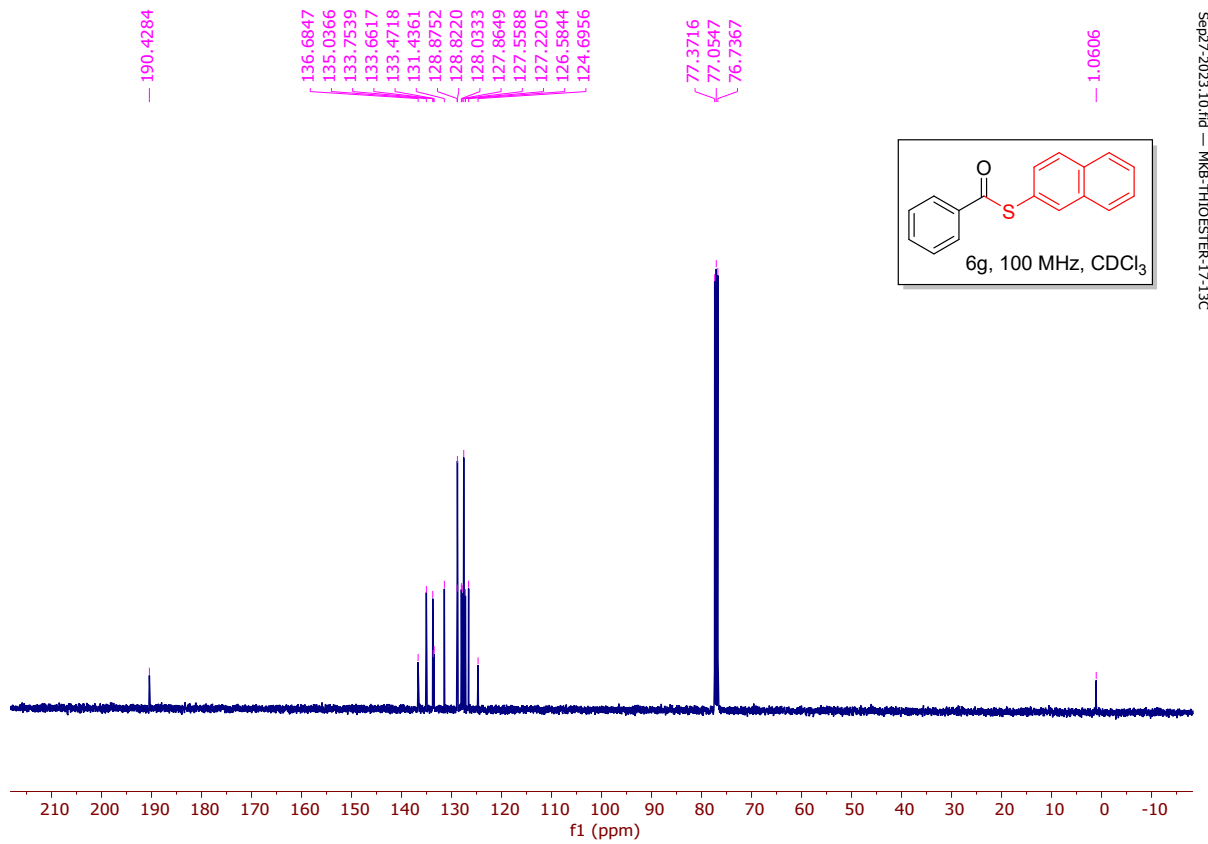

Sep27-2023.10.fid — MKB-THIOESTER-17-13C

8- 1H & 13C NMR

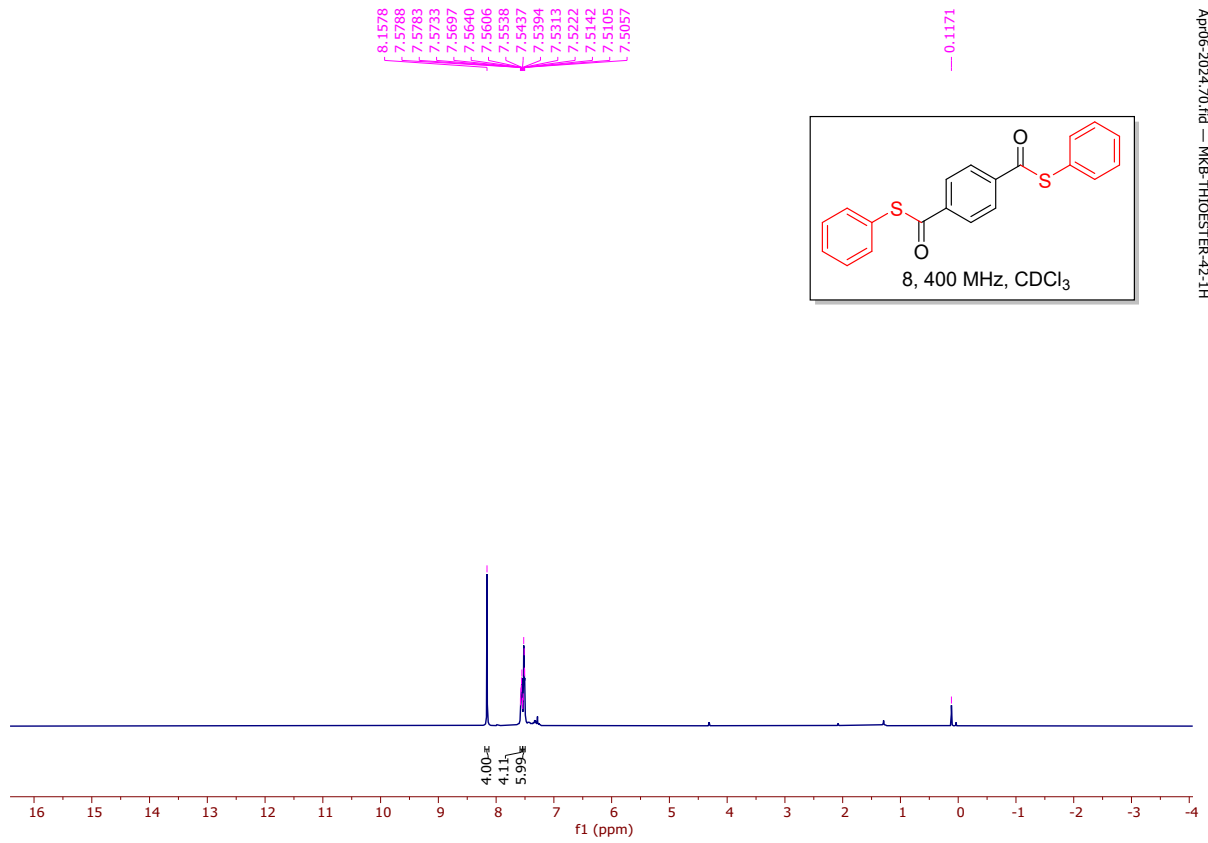

Apr06-2024.20.fid — MKB-THIOESTER-42-1H

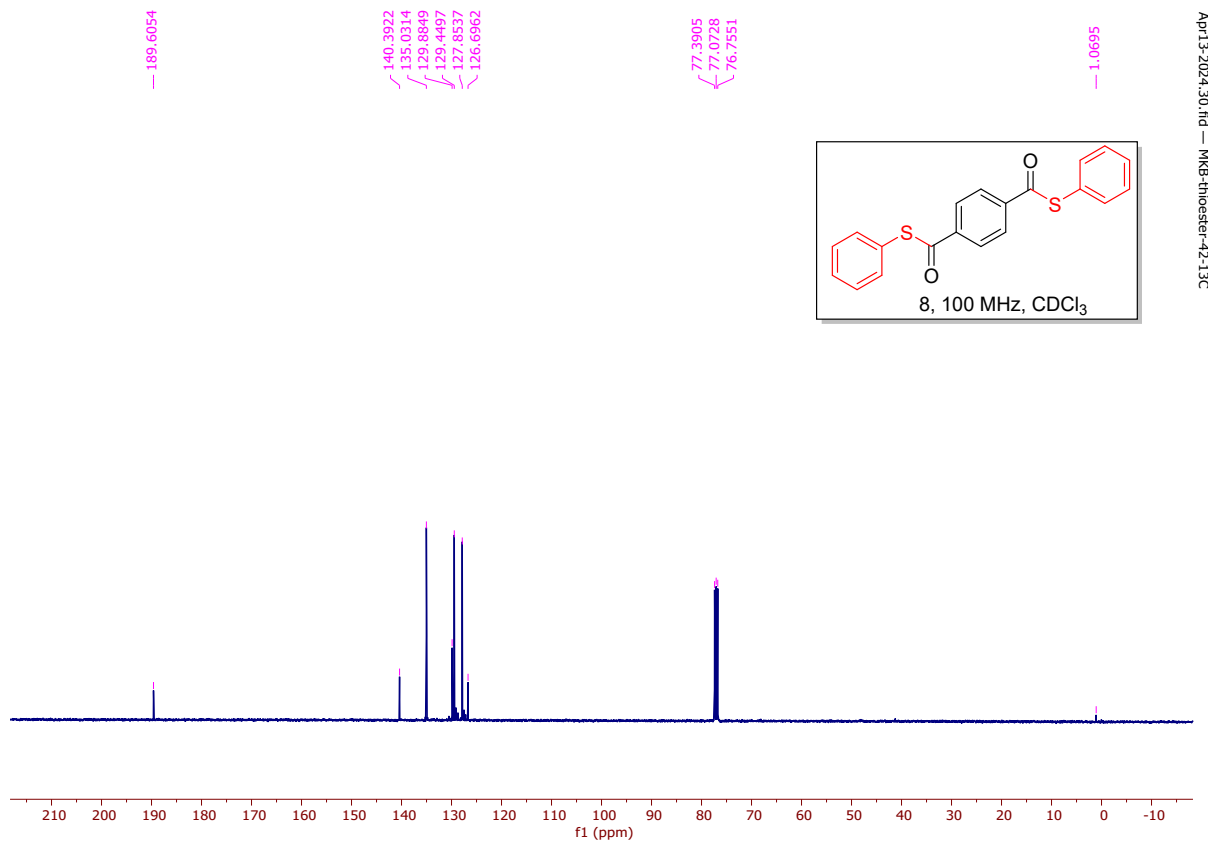

Apr13-2024.30.fid — MKB-thioester-42-13C

10a - <sup>1</sup>H & <sup>13</sup>C NMR

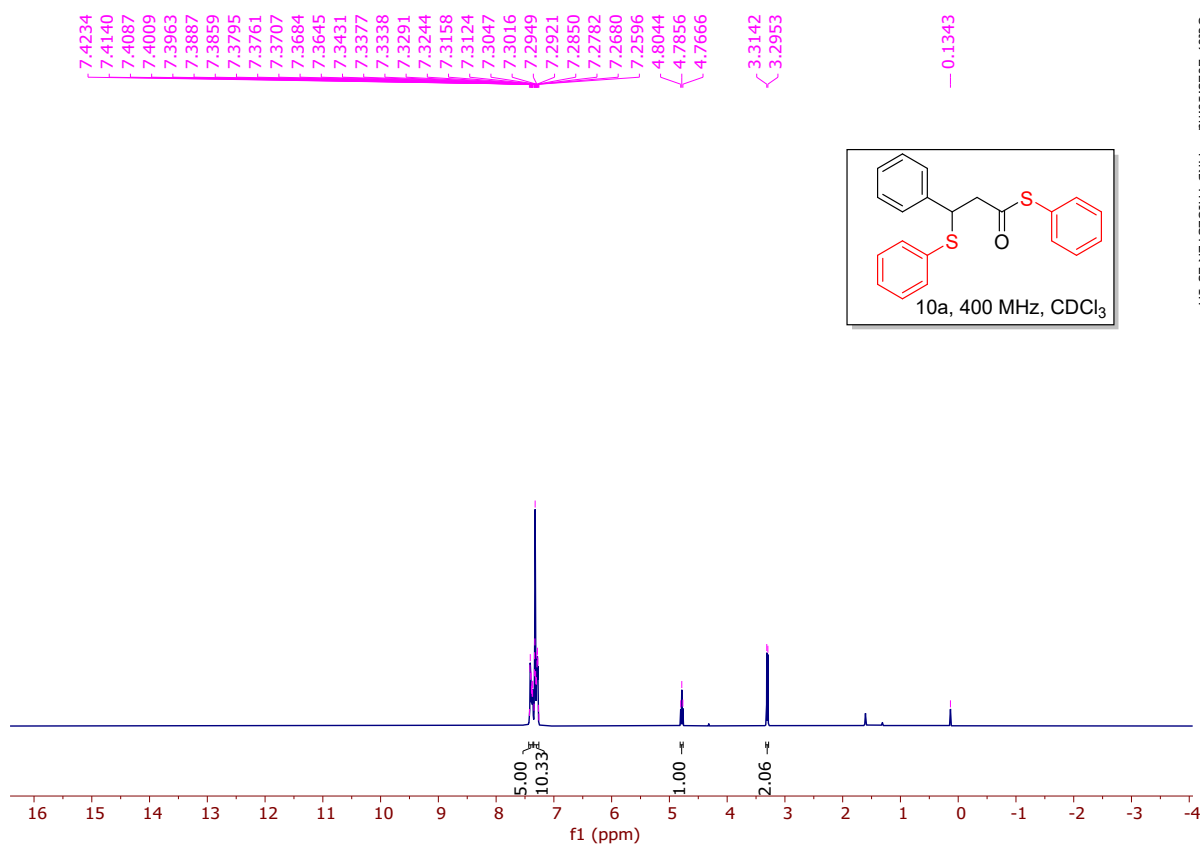

Oct07-2023.10.fid — MKB-THIOESTER-23-1H

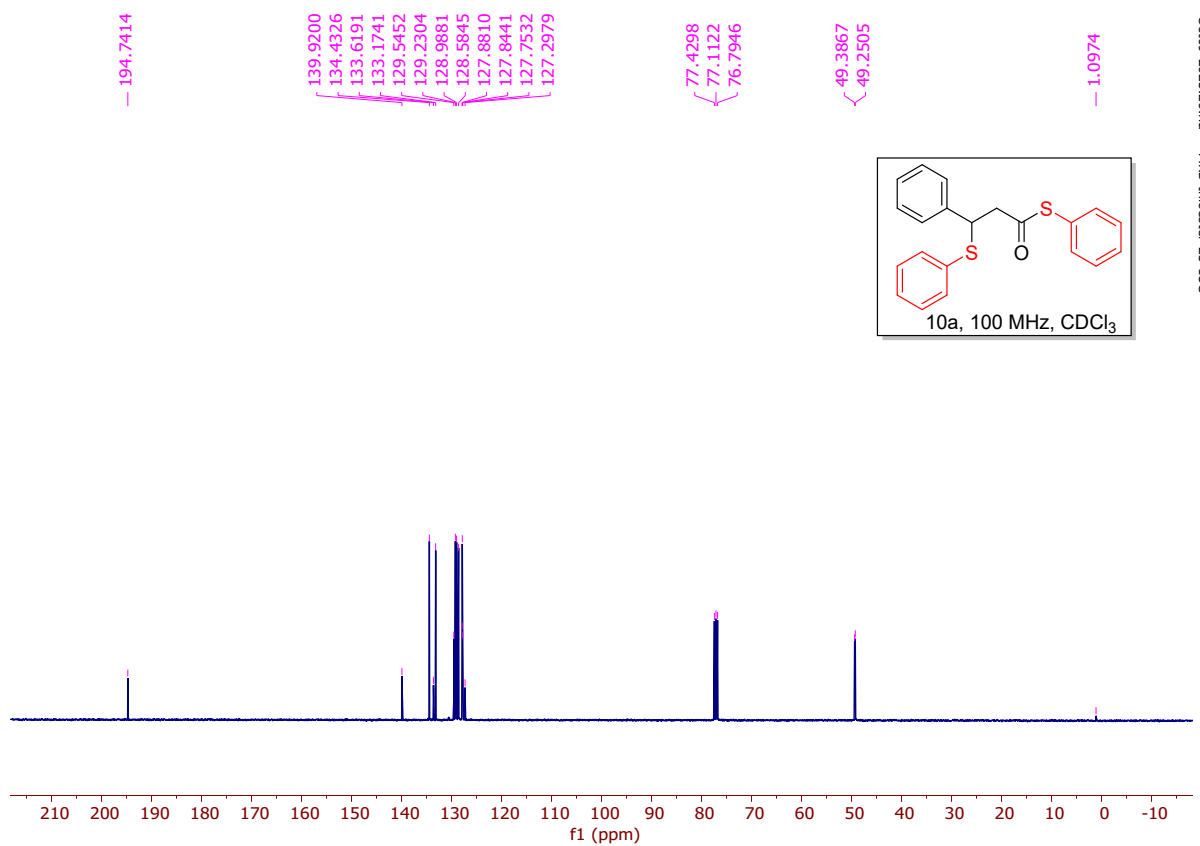

Oct09-2023.20.fid — MKB-thioester-23-13C

# 10b - <sup>1</sup>H & <sup>13</sup>C NMR

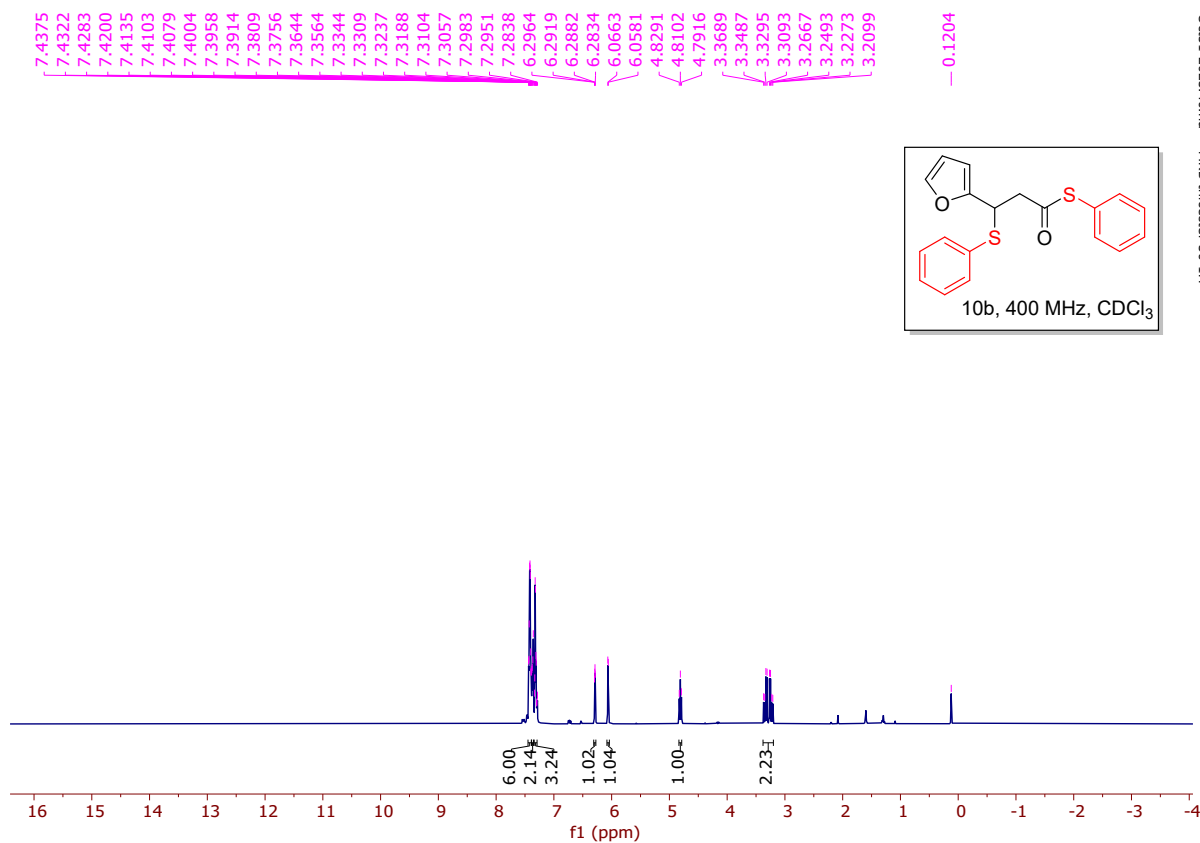

Oct31-2023-40.fid — MKB-thioester-30-1H

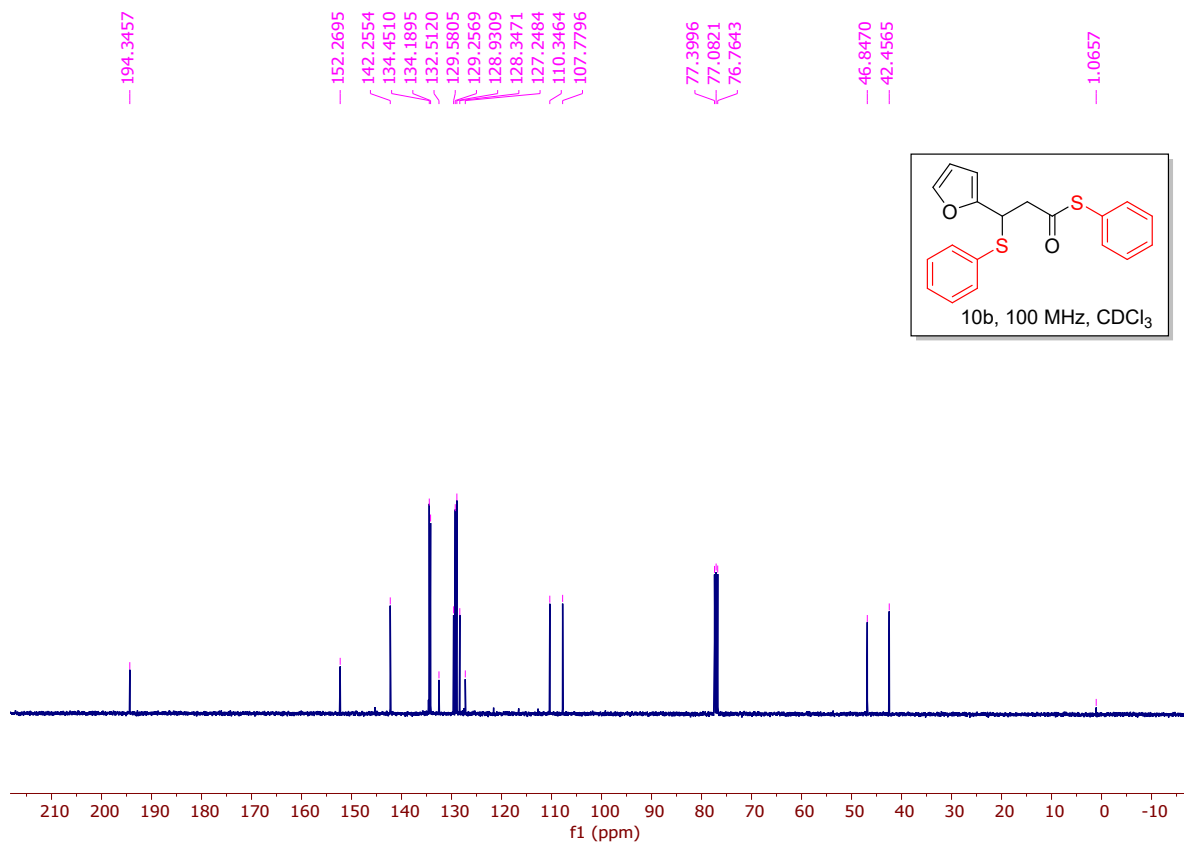

Nov06-2023-20.fid — MKB-THIOESTER-30-13C

# 10c - <sup>1</sup>H & <sup>13</sup>C NMR

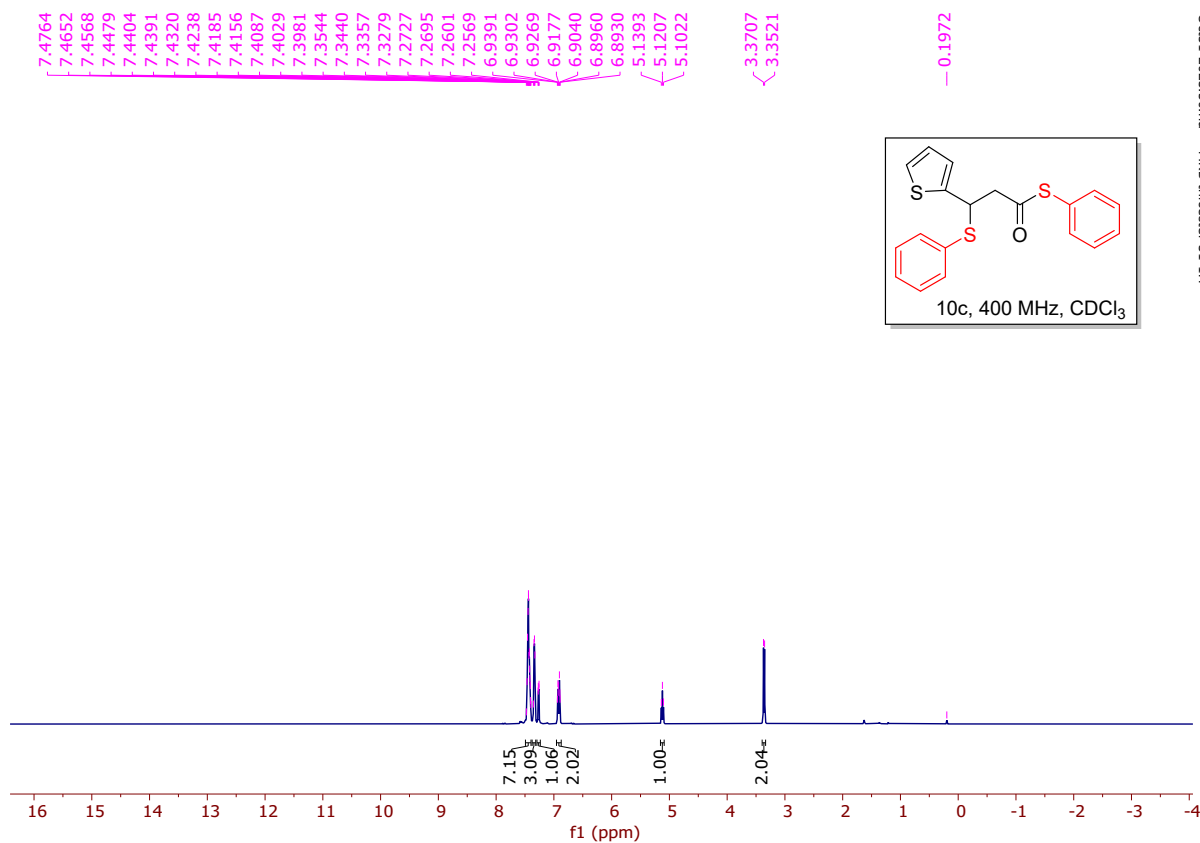

Oct31-2023.50.fid — MKB-thioester-31-1H

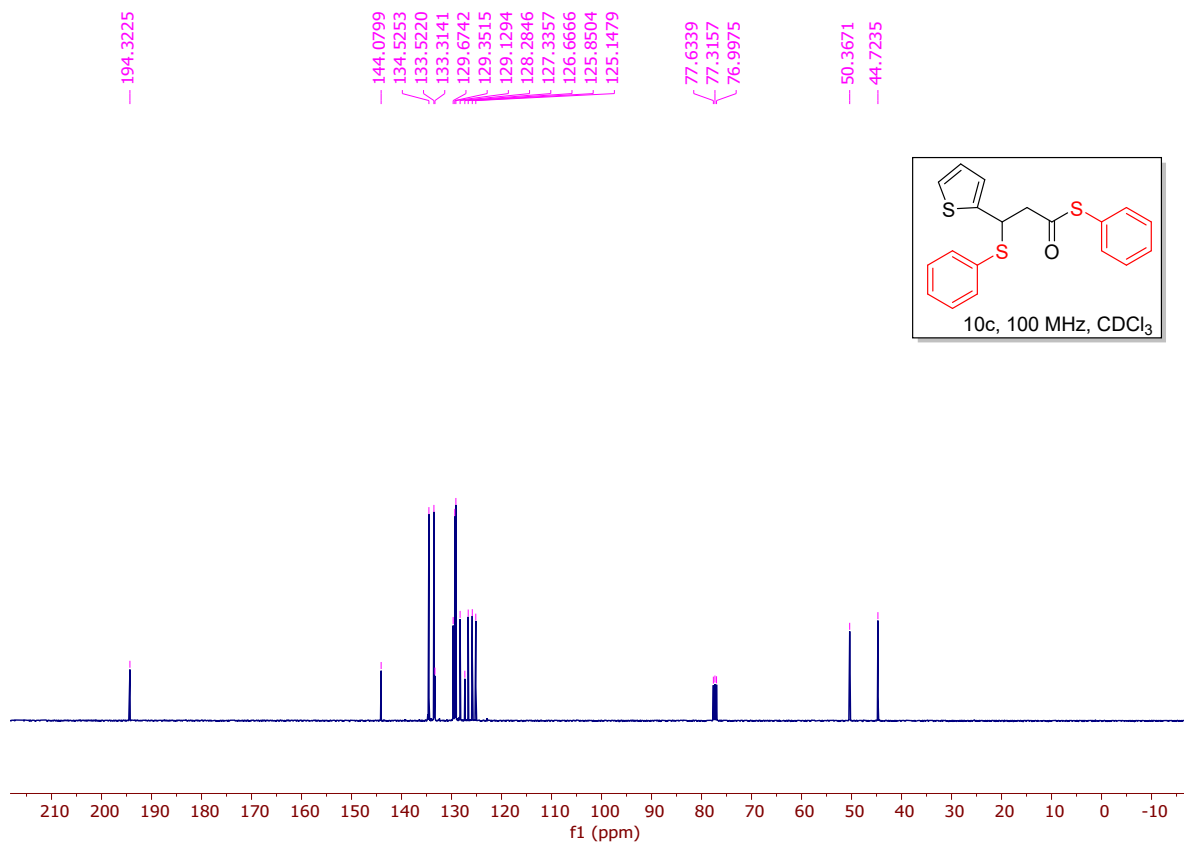

Nov06-2023.30.fid — MKB-THIOESTER-31-13C

10d - <sup>1</sup>H & <sup>13</sup>C NMR

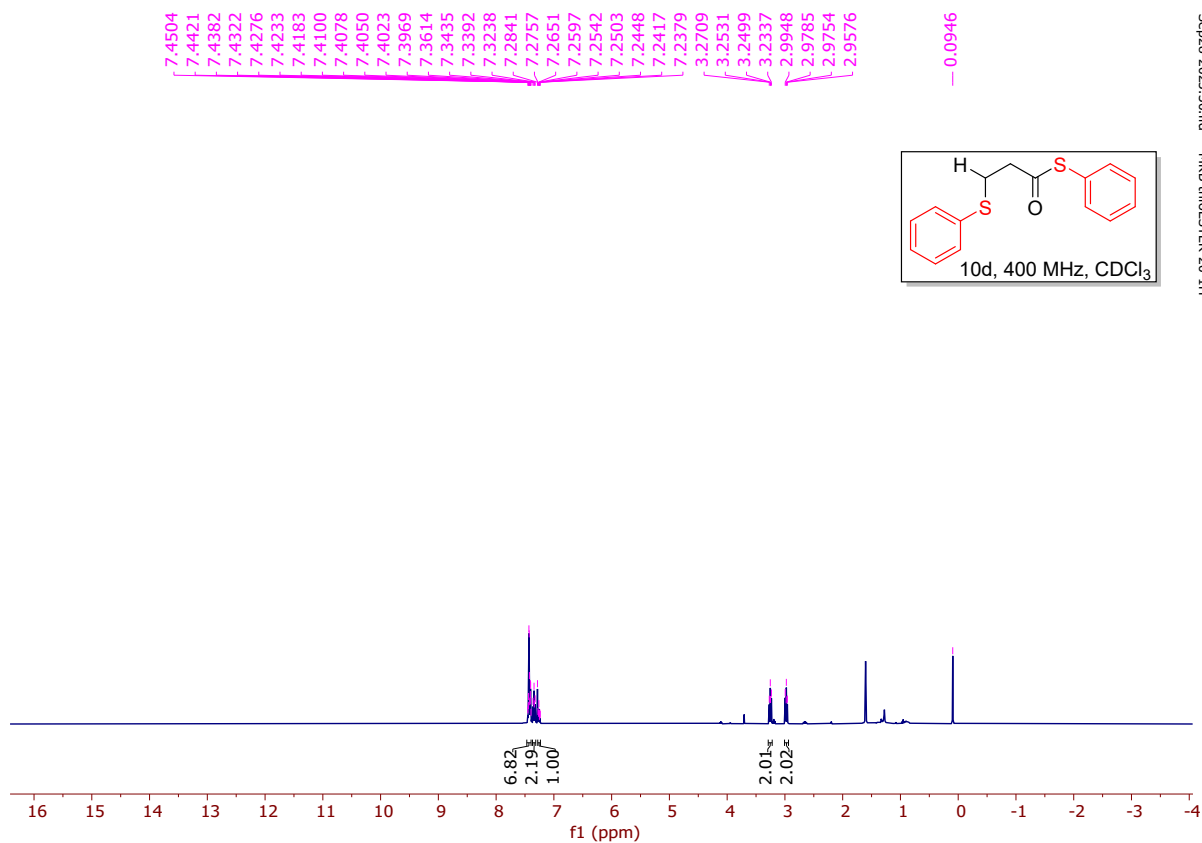

Seq28-2023\_30.fid — MK8-thioester-20-1H

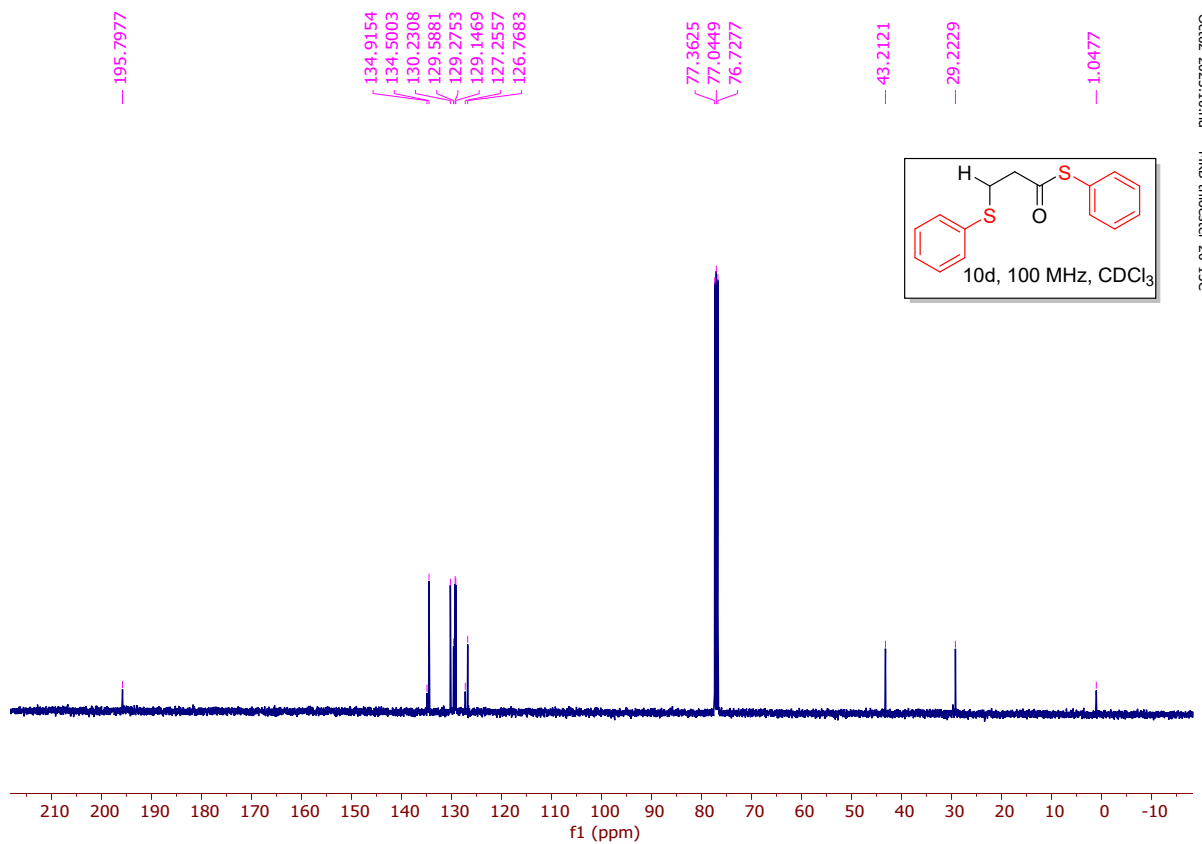

Oct02-2023\_10.fid — MK8-thioester-20-13C



# 10e - <sup>1</sup>H & <sup>13</sup>C NMR

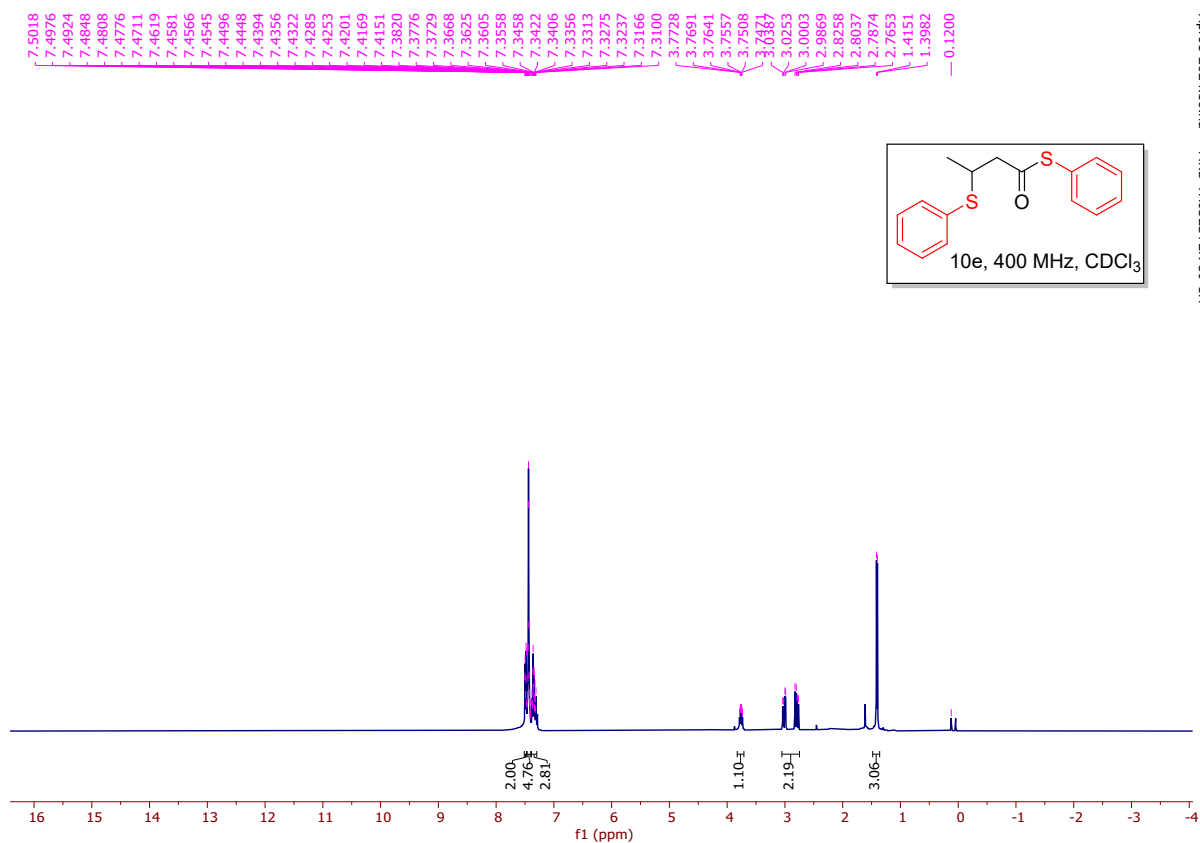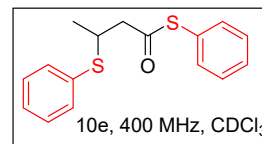

Apr01-2024.10.fid — MKB-THIOESTER-39-1H

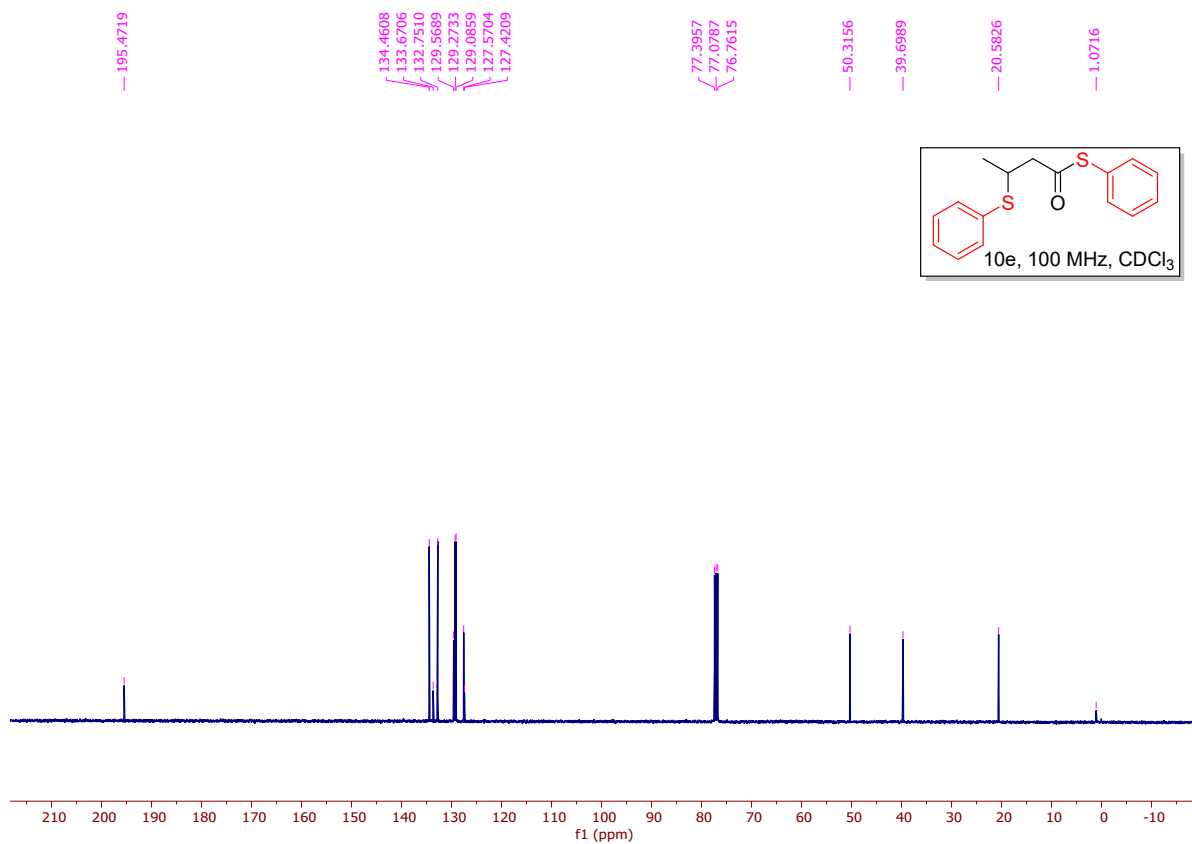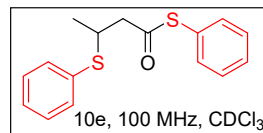

Apr13-2024.20.fid — MKB-thioester-39-13C

# 10f - <sup>1</sup>H & <sup>13</sup>C NMR

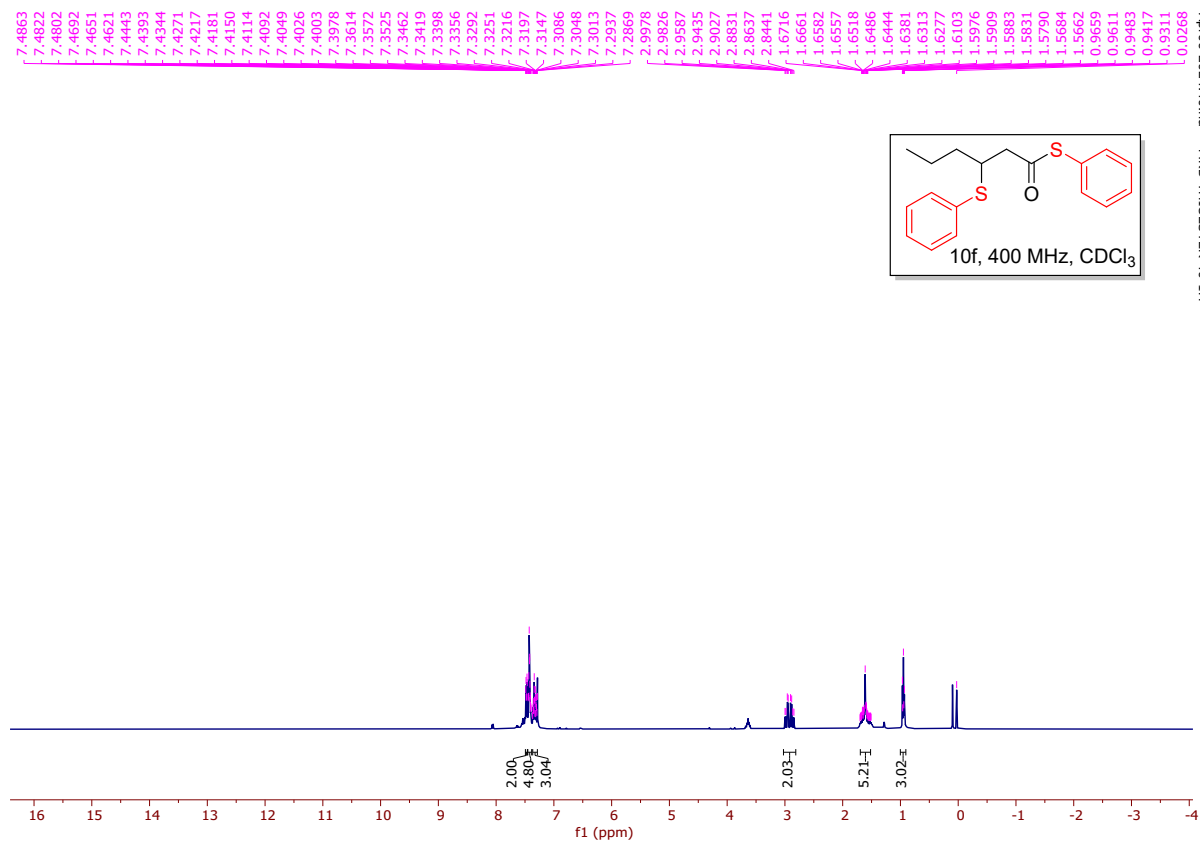

Apr06-2024-40.fid — MKB-THIOESTER-40-1H

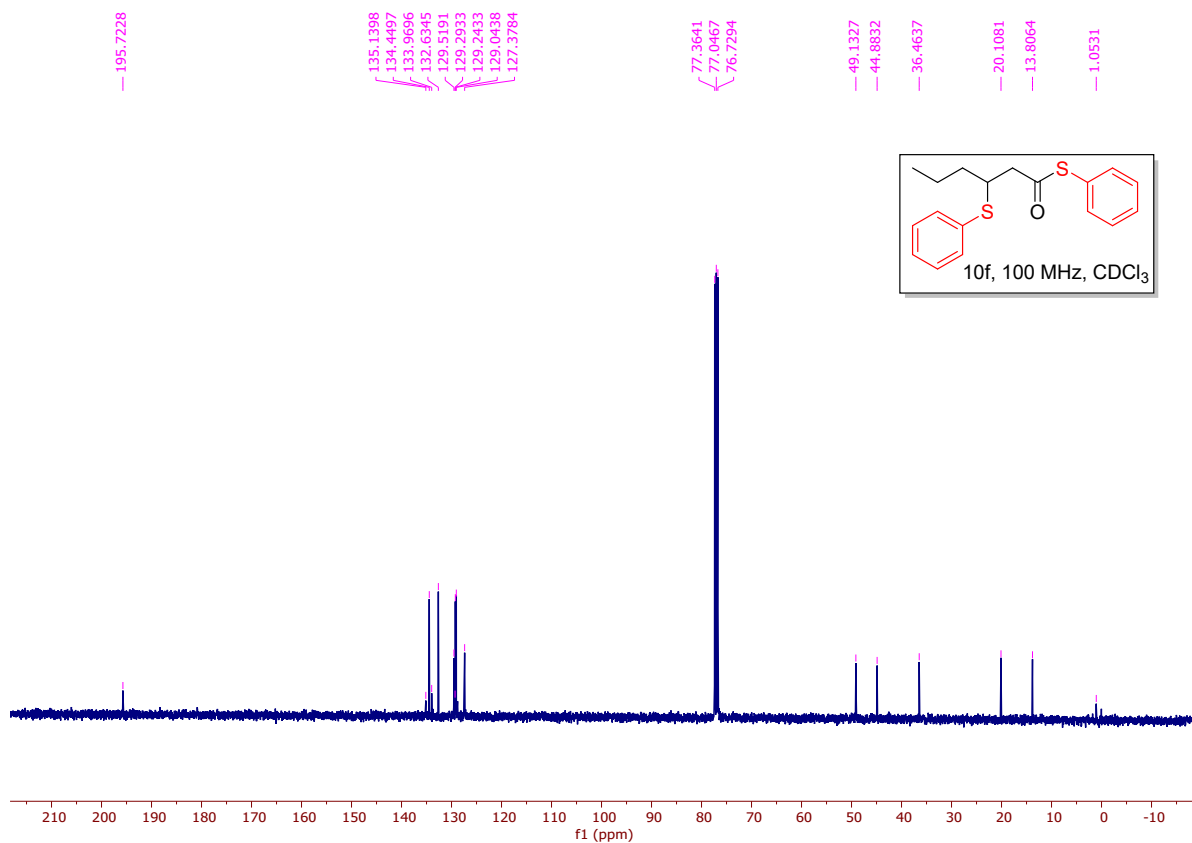

Apr10-2024-80.fid — MKB-Thioester-40-13C

## 9. Single crystal XRD study of thioester 2j

ORTEP diagram of 2j drawn with 50% contour space probability for all non-H atoms.

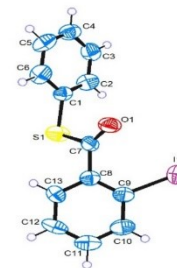

| Refined crystal data of 2j (CCDC no – 2339403) |                                                   |
|------------------------------------------------|---------------------------------------------------|
| Empirical formula                              | C <sub>13</sub> H <sub>9</sub> IOS                |
| Formula weight                                 | 340.1785                                          |
| Temperature/K                                  | 298                                               |
| Crystal system                                 | Monoclinic                                        |
| Space group                                    | P 21/C                                            |
| a/Å                                            | 18.834(3)                                         |
| b/Å                                            | 7.9364(13)                                        |
| c/Å                                            | 17.557(3)                                         |
| α/°                                            | 90                                                |
| β/°                                            | 103.605(6)                                        |
| γ/°                                            | 90                                                |
| Volume/Å <sup>3</sup>                          | 2550.7(7)                                         |
| Z                                              | 27                                                |
| ρ/g.cm <sup>-3</sup>                           | 1.772                                             |
| μ/mm <sup>-1</sup>                             | 2.650                                             |
| F (000)                                        | 1312                                              |
| Radiation                                      | MoKα (λ = 0.71073)                                |
| 2θ range for data collection/°                 | 2.225 to 24.854                                   |
| Index ranges                                   | -22 ≤ h ≤ 22, -9 ≤ k ≤ 9, -20 ≤ l ≤ 20            |
| Reflections collected                          | 57729                                             |
| Independent reflections                        | 4423                                              |
| Goodness-of-fit on F <sup>2</sup>              | 1.160                                             |
| Final R indexes [I ≥ 2σ (I)]                   | R <sub>1</sub> = 0.0494, wR <sub>2</sub> = 0.1512 |
| Final R indexes (all data)                     | R <sub>1</sub> = 0.0723, wR <sub>2</sub> = 0.1699 |
